# Supplementary material for: SMRT sequencing of a full-length transcriptome reveals transcript variants involved in C18 unsaturated fatty acid biosynthesis and metabolism pathways at chilling temperature in Pennisetum giganteum
Source: BMC Genomics. 2020 Jan 16;21:52. doi: 10.1186/s12864-019-6441-3 (PMC6966868; doi:10.1186/s12864-019-6441-3)
Supplement: Supplementary file 5 — Additional file 5 Table S2. Distribution of transcripts and unigenes. [file 12864_2019_6441_MOESM5_ESM.xlsx]

## Sheet: Sheet1
Table S2. Distribution of transcripts and unigenes.
Transcripts length interval	<500bp	500-1kbp	1k-2kbp	2k-3kbp	>3kbp	Total
Number of Transcripts	34941	45156	64530	66612	125651	336890
Number of Unigenes	34041	42609	60043	62506	120727	319926
