# Supplementary material for: SMRT sequencing of a full-length transcriptome reveals transcript variants involved in C18 unsaturated fatty acid biosynthesis and metabolism pathways at chilling temperature in Pennisetum giganteum
Source: BMC Genomics. 2020 Jan 16;21:52. doi: 10.1186/s12864-019-6441-3 (PMC6966868; doi:10.1186/s12864-019-6441-3)
Supplement: Supplementary file 6 — Additional file 6 Table S3. Summary of unigenes annotation. [file 12864_2019_6441_MOESM6_ESM.xlsx]

## Sheet: Sheet1
Table S3. Summary of unigenes annotation.
	Number of Unigenes		Percentage (%)
	RT	CT	RT	CT
Annotated in NR	163748	120529	83.4921	85.6237
Annotated in NT	165942	122147	84.6108	86.7731
Annotated in SwissProt	124098	99970	63.2753	71.0186
Annotated in GO	65341	71041	33.3162	50.4674
Annotated in KOG	87244	73324	44.4841	52.0893
Annotated in KEGG	158795	117980	80.9666	83.8129
Annotated in all Databases	35979	46225	18.345	32.8382
Annotated in at least one Database	178330	129746	90.9272	92.1714
Total Unigenes	196124	140766	100	100
