# Supplementary material for: SMRT sequencing of a full-length transcriptome reveals transcript variants involved in C18 unsaturated fatty acid biosynthesis and metabolism pathways at chilling temperature in Pennisetum giganteum
Source: BMC Genomics. 2020 Jan 16;21:52. doi: 10.1186/s12864-019-6441-3 (PMC6966868; doi:10.1186/s12864-019-6441-3)
Supplement: Supplementary file 8 — Additional file 8 Table S5. LncRNA prediction. [file 12864_2019_6441_MOESM8_ESM.xlsx]

## Sheet: Sheet1
Table S5. LncRNA prediction.
RT						CT
Transcript ID	length	cnci	cpc	pfam	plek	Transcript ID	length	cnci	cpc	pfam	plek
i0_HQ_N_c100028/f2p0/422	422	N	N	Y	Y	i0_HQ_C_c10011/f3p1/952	952	N	N	N	Y
i0_HQ_N_c10003/f2p41/456	456	Y	N	Y	Y	i0_HQ_C_c10019/f2p1/802	802	N	N	N	Y
i0_HQ_N_c100040/f2p2/300	300	Y	Y	Y	Y	i0_HQ_C_c1003/f4p0/577	577	Y	Y	Y	Y
i0_HQ_N_c10007/f2p0/283	283	Y	Y	Y	Y	i0_HQ_C_c10038/f4p1/780	780	N	Y	Y	Y
i0_HQ_N_c1001/f9p3/581	581	N	N	Y	Y	i0_HQ_C_c10041/f2p3/508	508	Y	Y	Y	Y
i0_HQ_N_c10016/f2p0/359	359	Y	Y	Y	Y	i0_HQ_C_c10045/f2p4/507	507	N	N	Y	Y
i0_HQ_N_c100261/f2p4/655	655	N	N	N	Y	i0_HQ_C_c10056/f2p0/604	604	N	N	N	Y
i0_HQ_N_c1003/f10p2/788	788	N	N	N	Y	i0_HQ_C_c10057/f2p0/950	950	N	N	N	Y
i0_HQ_N_c100315/f2p7/817	817	N	N	N	Y	i0_HQ_C_c10061/f2p4/355	355	N	N	Y	Y
i0_HQ_N_c10038/f3p0/791	791	N	N	Y	Y	i0_HQ_C_c10073/f3p0/737	737	N	Y	Y	Y
i0_HQ_N_c100408/f2p0/323	323	Y	Y	Y	Y	i0_HQ_C_c10075/f2p9/774	774	N	N	N	Y
i0_HQ_N_c10043/f10p1/707	707	N	N	Y	Y	i0_HQ_C_c10078/f2p2/923	923	Y	N	N	Y
i0_HQ_N_c100510/f3p1/830	830	N	N	N	Y	i0_HQ_C_c10095/f5p1/657	657	N	N	N	Y
i0_HQ_N_c100519/f2p0/300	300	Y	Y	Y	Y	i0_HQ_C_c1010/f6p5/685	685	N	N	N	Y
i0_HQ_N_c10052/f2p0/874	874	N	N	N	Y	i0_HQ_C_c10111/f3p1/886	886	N	N	N	Y
i0_HQ_N_c100549/f2p1/407	407	N	Y	Y	Y	i0_HQ_C_c10118/f10p1/482	482	Y	N	Y	Y
i0_HQ_N_c10064/f3p0/357	357	Y	Y	Y	Y	i0_HQ_C_c10122/f2p3/712	712	N	N	N	Y
i0_HQ_N_c100670/f2p21/561	561	Y	N	Y	Y	i0_HQ_C_c10124/f2p3/420	420	Y	Y	Y	Y
i0_HQ_N_c100676/f2p0/302	302	Y	Y	Y	Y	i0_HQ_C_c10127/f4p2/311	311	Y	Y	Y	Y
i0_HQ_N_c10069/f2p2/772	772	N	N	N	Y	i0_HQ_C_c10131/f3p0/311	311	Y	Y	Y	Y
i0_HQ_N_c10070/f3p0/697	697	N	Y	Y	N	i0_HQ_C_c10156/f2p0/800	800	N	N	Y	Y
i0_HQ_N_c10074/f4p10/864	864	N	N	N	Y	i0_HQ_C_c10171/f3p0/778	778	N	N	Y	N
i0_HQ_N_c1008/f10p2/590	590	N	N	Y	Y	i0_HQ_C_c10183/f2p2/652	652	N	N	Y	Y
i0_HQ_N_c10082/f6p3/968	968	N	N	Y	Y	i0_HQ_C_c10191/f2p0/318	318	Y	Y	Y	Y
i0_HQ_N_c100829/f2p3/910	910	N	N	N	Y	i0_HQ_C_c10193/f2p0/714	714	N	Y	Y	Y
i0_HQ_N_c100830/f2p161/445	445	Y	N	Y	Y	i0_HQ_C_c10199/f2p1/780	780	N	N	Y	N
i0_HQ_N_c10090/f3p0/377	377	Y	N	Y	Y	i0_HQ_C_c10208/f2p0/353	353	Y	Y	Y	Y
i0_HQ_N_c100959/f2p23/497	497	N	N	Y	Y	i0_HQ_C_c10212/f3p0/774	774	N	N	Y	Y
i0_HQ_N_c10104/f7p3/921	921	N	N	N	Y	i0_HQ_C_c10215/f5p2/855	855	N	Y	Y	Y
i0_HQ_N_c10108/f2p5/379	379	Y	Y	Y	Y	i0_HQ_C_c10225/f4p0/726	726	N	N	N	Y
i0_HQ_N_c10110/f3p6/931	931	N	N	N	Y	i0_HQ_C_c10228/f2p0/971	971	N	N	N	Y
i0_HQ_N_c10121/f2p1/685	685	N	N	Y	Y	i0_HQ_C_c10233/f2p4/670	670	N	N	Y	Y
i0_HQ_N_c10126/f2p2/590	590	N	N	N	Y	i0_HQ_C_c10250/f2p15/938	938	Y	N	N	Y
i0_HQ_N_c10129/f4p10/952	952	N	N	N	Y	i0_HQ_C_c1028/f6p5/917	917	N	Y	Y	Y
i0_HQ_N_c10130/f2p2/645	645	N	N	N	Y	i0_HQ_C_c1029/f4p1/838	838	N	N	N	Y
i0_HQ_N_c10134/f2p3/471	471	Y	N	Y	Y	i0_HQ_C_c10297/f2p1/752	752	N	N	N	Y
i0_HQ_N_c101355/f2p0/280	280	Y	Y	Y	Y	i0_HQ_C_c1030/f5p11/296	296	Y	Y	Y	Y
i0_HQ_N_c101410/f2p3/684	684	N	N	N	Y	i0_HQ_C_c10302/f2p0/583	583	Y	Y	Y	Y
i0_HQ_N_c101467/f2p1/557	557	N	N	N	Y	i0_HQ_C_c10315/f2p3/646	646	N	N	N	Y
i0_HQ_N_c10148/f5p1/392	392	Y	Y	Y	Y	i0_HQ_C_c10326/f2p1/597	597	Y	N	Y	Y
i0_HQ_N_c10154/f3p1/660	660	N	N	Y	Y	i0_HQ_C_c10332/f3p3/347	347	Y	N	Y	Y
i0_HQ_N_c101545/f2p3/786	786	N	N	N	Y	i0_HQ_C_c1034/f5p3/628	628	N	N	N	Y
i0_HQ_N_c10166/f4p1/395	395	N	N	Y	Y	i0_HQ_C_c10344/f6p9/998	998	N	N	N	Y
i0_HQ_N_c10169/f3p1/451	451	N	N	Y	Y	i0_HQ_C_c10347/f4p0/826	826	N	N	N	Y
i0_HQ_N_c10172/f3p3/437	437	N	N	Y	Y	i0_HQ_C_c1035/f8p4/574	574	N	N	N	Y
i0_HQ_N_c101731/f2p1/645	645	N	N	Y	Y	i0_HQ_C_c10351/f5p2/524	524	Y	Y	Y	Y
i0_HQ_N_c10176/f2p0/278	278	Y	Y	Y	Y	i0_HQ_C_c10356/f2p3/445	445	Y	Y	Y	Y
i0_HQ_N_c10177/f2p429/742	742	Y	N	N	Y	i0_HQ_C_c10365/f3p0/692	692	N	Y	Y	Y
i0_HQ_N_c101828/f2p0/553	553	N	N	Y	Y	i0_HQ_C_c10369/f2p31/572	572	Y	N	N	Y
i0_HQ_N_c101870/f2p0/944	944	N	N	N	Y	i0_HQ_C_c10371/f3p132/672	672	Y	N	Y	Y
i0_HQ_N_c1019/f9p2/793	793	N	N	N	Y	i0_HQ_C_c10379/f3p2/680	680	N	N	Y	Y
i0_HQ_N_c101914/f2p0/851	851	N	N	N	Y	i0_HQ_C_c1038/f3p3/591	591	N	N	Y	Y
i0_HQ_N_c10193/f4p3/515	515	N	N	Y	Y	i0_HQ_C_c10385/f2p0/403	403	N	N	Y	Y
i0_HQ_N_c10195/f2p0/675	675	N	N	N	Y	i0_HQ_C_c10386/f5p3/699	699	N	N	N	Y
i0_HQ_N_c10199/f2p1/441	441	N	N	Y	Y	i0_HQ_C_c10388/f4p10/459	459	Y	Y	Y	Y
i0_HQ_N_c102/f23p6/449	449	N	N	Y	Y	i0_HQ_C_c10403/f3p0/533	533	N	N	N	Y
i0_HQ_N_c10200/f4p0/288	288	Y	Y	Y	Y	i0_HQ_C_c10406/f2p1/814	814	N	N	N	Y
i0_HQ_N_c102003/f2p0/246	246	Y	Y	Y	Y	i0_HQ_C_c10413/f2p0/525	525	N	N	Y	Y
i0_HQ_N_c10205/f4p2/898	898	N	N	Y	Y	i0_HQ_C_c10414/f7p2/679	679	N	N	N	Y
i0_HQ_N_c10210/f3p17/505	505	Y	Y	Y	Y	i0_HQ_C_c10428/f2p10/946	946	N	N	N	Y
i0_HQ_N_c10224/f2p2/432	432	Y	Y	Y	Y	i0_HQ_C_c10442/f4p1/455	455	N	N	Y	Y
i0_HQ_N_c102282/f2p0/489	489	Y	Y	Y	Y	i0_HQ_C_c10443/f2p7/708	708	N	N	N	Y
i0_HQ_N_c10229/f2p2/923	923	N	N	N	Y	i0_HQ_C_c10445/f2p1/620	620	N	N	Y	N
i0_HQ_N_c102350/f2p4/667	667	N	N	Y	Y	i0_HQ_C_c1046/f3p0/645	645	N	N	N	Y
i0_HQ_N_c102429/f2p7/935	935	Y	N	N	Y	i0_HQ_C_c10467/f2p7/409	409	Y	Y	Y	Y
i0_HQ_N_c10250/f2p1/310	310	Y	Y	Y	Y	i0_HQ_C_c1049/f3p21/891	891	N	N	N	Y
i0_HQ_N_c102504/f2p2/299	299	Y	Y	Y	Y	i0_HQ_C_c10492/f2p1/644	644	Y	N	Y	Y
i0_HQ_N_c10258/f4p1/822	822	N	N	Y	Y	i0_HQ_C_c10499/f2p1/547	547	N	Y	Y	Y
i0_HQ_N_c1027/f24p8/771	771	N	N	N	Y	i0_HQ_C_c1050/f5p6/512	512	Y	N	Y	Y
i0_HQ_N_c10274/f2p0/620	620	N	Y	Y	Y	i0_HQ_C_c10502/f3p0/871	871	N	N	Y	Y
i0_HQ_N_c10280/f3p1/539	539	Y	Y	Y	Y	i0_HQ_C_c10503/f2p3/699	699	N	Y	Y	Y
i0_HQ_N_c102827/f2p3/731	731	N	N	N	Y	i0_HQ_C_c10516/f9p3/465	465	N	N	Y	Y
i0_HQ_N_c102868/f2p2/835	835	N	N	N	Y	i0_HQ_C_c10521/f2p0/732	732	N	N	Y	Y
i0_HQ_N_c10290/f6p7/801	801	N	N	N	Y	i0_HQ_C_c10531/f3p3/498	498	N	N	Y	Y
i0_HQ_N_c102988/f2p6/953	953	N	N	Y	N	i0_HQ_C_c10535/f2p1/498	498	N	N	N	Y
i0_HQ_N_c10300/f2p8/577	577	N	N	Y	Y	i0_HQ_C_c10541/f2p0/267	267	Y	Y	Y	Y
i0_HQ_N_c10301/f2p27/821	821	Y	N	Y	Y	i0_HQ_C_c10551/f2p0/321	321	Y	N	Y	Y
i0_HQ_N_c103025/f2p2/587	587	N	Y	Y	Y	i0_HQ_C_c10556/f3p0/601	601	N	N	Y	Y
i0_HQ_N_c10309/f4p2/519	519	N	N	Y	Y	i0_HQ_C_c1056/f3p6/355	355	Y	Y	Y	Y
i0_HQ_N_c103194/f2p9/652	652	N	N	Y	Y	i0_HQ_C_c10563/f2p0/720	720	N	N	Y	Y
i0_HQ_N_c1032/f3p0/541	541	N	Y	Y	Y	i0_HQ_C_c10564/f2p1/516	516	N	N	N	Y
i0_HQ_N_c10326/f3p3/670	670	N	N	N	Y	i0_HQ_C_c1057/f3p0/447	447	Y	N	Y	Y
i0_HQ_N_c10327/f3p3/795	795	N	N	N	Y	i0_HQ_C_c10587/f6p1/644	644	N	N	Y	Y
i0_HQ_N_c103274/f2p0/518	518	N	N	N	Y	i0_HQ_C_c10589/f3p2/503	503	N	N	Y	Y
i0_HQ_N_c103275/f2p3/467	467	Y	N	Y	Y	i0_HQ_C_c1059/f3p0/392	392	Y	N	Y	Y
i0_HQ_N_c103288/f2p1/527	527	Y	N	Y	Y	i0_HQ_C_c1060/f4p2/664	664	N	N	N	Y
i0_HQ_N_c10330/f2p18/606	606	Y	N	N	Y	i0_HQ_C_c10602/f2p4/803	803	N	N	N	Y
i0_HQ_N_c10332/f2p26/485	485	Y	N	Y	Y	i0_HQ_C_c10606/f2p1/358	358	Y	Y	Y	Y
i0_HQ_N_c103324/f2p6/916	916	N	N	N	Y	i0_HQ_C_c1061/f6p1/713	713	N	N	N	Y
i0_HQ_N_c103355/f2p0/346	346	N	N	Y	Y	i0_HQ_C_c10616/f2p0/457	457	Y	Y	Y	Y
i0_HQ_N_c103362/f2p9/672	672	N	N	N	Y	i0_HQ_C_c1062/f5p3/572	572	Y	N	Y	Y
i0_HQ_N_c10341/f9p4/788	788	N	N	N	Y	i0_HQ_C_c10626/f2p0/507	507	N	N	Y	Y
i0_HQ_N_c103413/f2p9/615	615	N	N	N	Y	i0_HQ_C_c10629/f2p0/769	769	N	N	N	Y
i0_HQ_N_c10347/f2p5/437	437	Y	Y	Y	Y	i0_HQ_C_c1063/f4p0/368	368	Y	Y	Y	Y
i0_HQ_N_c10349/f3p2/977	977	N	N	N	Y	i0_HQ_C_c10631/f2p14/637	637	Y	N	Y	Y
i0_HQ_N_c103506/f2p0/753	753	N	N	N	Y	i0_HQ_C_c10636/f2p2/346	346	Y	Y	Y	Y
i0_HQ_N_c103523/f2p5/790	790	N	N	N	Y	i0_HQ_C_c1064/f7p1/899	899	N	N	Y	Y
i0_HQ_N_c10366/f5p3/778	778	N	N	N	Y	i0_HQ_C_c10642/f2p4/376	376	Y	Y	Y	Y
i0_HQ_N_c103667/f2p0/864	864	N	Y	Y	Y	i0_HQ_C_c10650/f3p4/844	844	N	N	Y	Y
i0_HQ_N_c103738/f2p0/279	279	Y	Y	Y	Y	i0_HQ_C_c10654/f5p3/518	518	Y	N	N	Y
i0_HQ_N_c10375/f7p9/929	929	N	N	Y	Y	i0_HQ_C_c1066/f2p0/295	295	Y	Y	Y	Y
i0_HQ_N_c10382/f2p1/612	612	N	N	N	Y	i0_HQ_C_c1067/f3p6/742	742	N	N	N	Y
i0_HQ_N_c10386/f2p5/597	597	N	N	N	Y	i0_HQ_C_c10677/f2p2/569	569	N	N	N	Y
i0_HQ_N_c10387/f2p2/844	844	N	N	N	Y	i0_HQ_C_c10678/f6p2/584	584	N	N	N	Y
i0_HQ_N_c1039/f7p0/576	576	N	N	Y	Y	i0_HQ_C_c1068/f9p0/779	779	N	N	N	Y
i0_HQ_N_c10396/f2p6/962	962	N	N	N	Y	i0_HQ_C_c10691/f2p1/942	942	N	N	Y	N
i0_HQ_N_c103980/f2p3/374	374	Y	Y	Y	Y	i0_HQ_C_c10693/f3p4/350	350	Y	Y	Y	Y
i0_HQ_N_c10406/f4p3/740	740	N	N	N	Y	i0_HQ_C_c10708/f2p2/424	424	Y	Y	Y	Y
i0_HQ_N_c10407/f2p0/710	710	Y	Y	Y	Y	i0_HQ_C_c1071/f5p5/947	947	N	N	N	Y
i0_HQ_N_c10409/f3p10/883	883	N	N	Y	Y	i0_HQ_C_c10711/f2p0/845	845	N	N	Y	Y
i0_HQ_N_c104121/f2p4/389	389	Y	Y	Y	Y	i0_HQ_C_c1072/f5p1/834	834	N	N	Y	Y
i0_HQ_N_c104164/f9p261/929	929	N	N	Y	N	i0_HQ_C_c10720/f3p30/613	613	Y	N	Y	Y
i0_HQ_N_c10427/f5p1/911	911	N	N	Y	Y	i0_HQ_C_c10726/f3p3/978	978	N	N	N	Y
i0_HQ_N_c104317/f9p0/231	231	Y	Y	Y	Y	i0_HQ_C_c10727/f2p0/348	348	Y	Y	Y	Y
i0_HQ_N_c104375/f4p1/597	597	N	Y	Y	Y	i0_HQ_C_c1073/f6p3/572	572	N	N	Y	Y
i0_HQ_N_c104385/f3p0/764	764	N	N	N	Y	i0_HQ_C_c1074/f4p2/539	539	N	N	N	Y
i0_HQ_N_c1044/f4p0/492	492	Y	Y	Y	Y	i0_HQ_C_c10741/f4p7/628	628	Y	N	Y	Y
i0_HQ_N_c104471/f6p6/400	400	Y	N	Y	Y	i0_HQ_C_c10742/f2p0/837	837	N	N	Y	Y
i0_HQ_N_c10448/f2p1/960	960	N	Y	Y	Y	i0_HQ_C_c10746/f2p6/803	803	N	N	N	Y
i0_HQ_N_c10449/f3p1/504	504	N	Y	Y	Y	i0_HQ_C_c1076/f3p2/864	864	N	Y	Y	Y
i0_HQ_N_c10450/f5p0/600	600	N	N	Y	Y	i0_HQ_C_c10765/f3p0/715	715	N	N	N	Y
i0_HQ_N_c104564/f6p0/235	235	Y	Y	Y	Y	i0_HQ_C_c1077/f3p23/974	974	N	N	N	Y
i0_HQ_N_c104576/f6p0/227	227	Y	Y	Y	Y	i0_HQ_C_c10773/f2p0/837	837	N	N	N	Y
i0_HQ_N_c104723/f4p30/607	607	N	N	Y	Y	i0_HQ_C_c10779/f3p5/565	565	N	N	Y	Y
i0_HQ_N_c104736/f4p2/357	357	Y	N	Y	Y	i0_HQ_C_c10797/f7p3/507	507	N	N	N	Y
i0_HQ_N_c104762/f3p1/741	741	N	N	N	Y	i0_HQ_C_c108/f29p3/576	576	N	N	N	Y
i0_HQ_N_c10477/f2p1/404	404	N	N	Y	Y	i0_HQ_C_c10800/f5p5/549	549	Y	N	Y	Y
i0_HQ_N_c1048/f6p5/623	623	Y	N	Y	Y	i0_HQ_C_c10801/f3p7/641	641	N	Y	Y	Y
i0_HQ_N_c104835/f4p0/236	236	Y	Y	Y	Y	i0_HQ_C_c10811/f2p4/840	840	N	N	Y	N
i0_HQ_N_c104838/f4p0/220	220	Y	Y	Y	Y	i0_HQ_C_c10829/f2p1/304	304	Y	Y	Y	Y
i0_HQ_N_c10484/f5p1/980	980	N	N	N	Y	i0_HQ_C_c10840/f2p27/826	826	N	N	N	Y
i0_HQ_N_c104857/f4p0/237	237	Y	Y	Y	Y	i0_HQ_C_c1085/f4p1/527	527	Y	N	Y	Y
i0_HQ_N_c104868/f2p0/312	312	Y	Y	Y	Y	i0_HQ_C_c10866/f2p4/354	354	Y	Y	Y	Y
i0_HQ_N_c104906/f4p18/473	473	N	Y	Y	Y	i0_HQ_C_c10878/f2p1/484	484	N	N	N	Y
i0_HQ_N_c104907/f4p0/223	223	Y	Y	Y	Y	i0_HQ_C_c10896/f2p0/320	320	Y	Y	Y	Y
i0_HQ_N_c104919/f4p3/534	534	N	N	Y	Y	i0_HQ_C_c10897/f2p2/436	436	Y	N	Y	Y
i0_HQ_N_c104922/f4p0/239	239	Y	N	Y	Y	i0_HQ_C_c10902/f2p1/383	383	N	Y	Y	Y
i0_HQ_N_c104943/f3p0/236	236	Y	Y	Y	Y	i0_HQ_C_c10906/f3p4/778	778	N	N	Y	N
i0_HQ_N_c104948/f4p0/225	225	Y	Y	Y	Y	i0_HQ_C_c10907/f4p3/911	911	N	N	N	Y
i0_HQ_N_c104951/f7p26/793	793	N	N	Y	N	i0_HQ_C_c10922/f4p0/821	821	N	N	N	Y
i0_HQ_N_c10497/f2p3/604	604	N	N	N	Y	i0_HQ_C_c10928/f4p0/491	491	N	N	Y	Y
i0_HQ_N_c10500/f3p1/848	848	N	N	N	Y	i0_HQ_C_c10934/f2p5/698	698	N	N	Y	Y
i0_HQ_N_c10501/f2p9/441	441	Y	Y	Y	Y	i0_HQ_C_c10938/f4p4/424	424	N	N	Y	Y
i0_HQ_N_c10502/f6p2/543	543	N	N	N	Y	i0_HQ_C_c10939/f4p2/448	448	Y	Y	Y	Y
i0_HQ_N_c105024/f3p0/229	229	Y	Y	Y	Y	i0_HQ_C_c10987/f2p0/318	318	Y	Y	Y	Y
i0_HQ_N_c105031/f3p0/217	217	Y	Y	Y	Y	i0_HQ_C_c1099/f6p2/901	901	N	N	N	Y
i0_HQ_N_c105049/f4p8/746	746	N	N	N	Y	i0_HQ_C_c10991/f2p0/721	721	N	N	Y	Y
i0_HQ_N_c105052/f2p0/258	258	Y	Y	Y	Y	i0_HQ_C_c11001/f2p0/261	261	Y	Y	Y	Y
i0_HQ_N_c105054/f3p0/210	210	Y	Y	Y	Y	i0_HQ_C_c11021/f2p0/413	413	Y	N	Y	Y
i0_HQ_N_c105070/f3p0/211	211	Y	Y	Y	Y	i0_HQ_C_c11023/f5p13/903	903	N	N	N	Y
i0_HQ_N_c10508/f8p9/723	723	N	N	Y	Y	i0_HQ_C_c11024/f2p0/538	538	Y	N	Y	Y
i0_HQ_N_c105093/f3p0/211	211	Y	Y	Y	Y	i0_HQ_C_c1105/f3p1/361	361	Y	Y	Y	Y
i0_HQ_N_c105113/f3p0/231	231	Y	Y	Y	Y	i0_HQ_C_c11050/f3p40/878	878	N	N	Y	Y
i0_HQ_N_c105124/f2p3/563	563	N	N	Y	Y	i0_HQ_C_c11056/f2p0/358	358	Y	Y	Y	Y
i0_HQ_N_c105130/f3p0/234	234	Y	Y	Y	Y	i0_HQ_C_c11057/f6p1/765	765	N	N	Y	Y
i0_HQ_N_c105169/f3p3/648	648	N	N	Y	Y	i0_HQ_C_c11060/f2p1/412	412	N	N	Y	Y
i0_HQ_N_c105226/f2p0/230	230	Y	Y	Y	Y	i0_HQ_C_c11065/f2p0/401	401	Y	Y	Y	Y
i0_HQ_N_c105233/f3p0/214	214	Y	Y	Y	Y	i0_HQ_C_c11067/f6p0/246	246	Y	N	Y	Y
i0_HQ_N_c105284/f2p2/645	645	N	N	Y	Y	i0_HQ_C_c11068/f2p0/366	366	Y	Y	Y	Y
i0_HQ_N_c105287/f2p0/234	234	Y	Y	Y	Y	i0_HQ_C_c11084/f2p14/731	731	N	N	Y	Y
i0_HQ_N_c105292/f2p0/224	224	Y	Y	Y	Y	i0_HQ_C_c11091/f2p0/682	682	N	N	Y	Y
i0_HQ_N_c105293/f2p0/277	277	Y	Y	Y	Y	i0_HQ_C_c11095/f4p0/597	597	N	N	Y	Y
i0_HQ_N_c105294/f2p0/282	282	Y	Y	Y	Y	i0_HQ_C_c11108/f2p6/746	746	N	N	N	Y
i0_HQ_N_c105295/f2p0/214	214	Y	Y	Y	Y	i0_HQ_C_c11109/f4p2/292	292	Y	Y	Y	Y
i0_HQ_N_c105301/f2p0/217	217	Y	Y	Y	Y	i0_HQ_C_c11111/f2p1/321	321	Y	Y	Y	Y
i0_HQ_N_c105303/f2p0/219	219	Y	Y	Y	Y	i0_HQ_C_c11124/f2p0/556	556	N	Y	Y	Y
i0_HQ_N_c105308/f2p0/215	215	Y	N	Y	Y	i0_HQ_C_c11128/f2p171/630	630	Y	N	Y	Y
i0_HQ_N_c105312/f2p0/248	248	Y	Y	Y	Y	i0_HQ_C_c11137/f2p8/713	713	N	N	Y	Y
i0_HQ_N_c105321/f2p0/238	238	Y	Y	Y	Y	i0_HQ_C_c1114/f5p2/491	491	Y	N	Y	Y
i0_HQ_N_c105322/f2p1/357	357	Y	Y	Y	Y	i0_HQ_C_c11143/f3p0/277	277	Y	Y	Y	Y
i0_HQ_N_c105327/f2p0/222	222	Y	Y	Y	Y	i0_HQ_C_c1115/f5p3/602	602	N	N	Y	Y
i0_HQ_N_c105328/f2p11/462	462	Y	N	Y	Y	i0_HQ_C_c11173/f3p5/476	476	Y	Y	Y	Y
i0_HQ_N_c105334/f3p7/842	842	N	N	N	Y	i0_HQ_C_c11174/f2p1/525	525	N	N	N	Y
i0_HQ_N_c105338/f2p4/411	411	Y	Y	Y	Y	i0_HQ_C_c11176/f2p1/729	729	N	Y	Y	Y
i0_HQ_N_c105346/f2p0/255	255	Y	Y	Y	Y	i0_HQ_C_c1118/f4p9/469	469	N	N	Y	Y
i0_HQ_N_c105357/f2p1/454	454	Y	Y	Y	Y	i0_HQ_C_c1119/f4p1/815	815	N	N	N	Y
i0_HQ_N_c105361/f2p0/227	227	Y	Y	Y	Y	i0_HQ_C_c11191/f2p4/367	367	Y	Y	Y	Y
i0_HQ_N_c10537/f2p1/683	683	Y	Y	Y	Y	i0_HQ_C_c11195/f2p2/665	665	Y	Y	Y	Y
i0_HQ_N_c105376/f5p9/546	546	Y	N	Y	Y	i0_HQ_C_c11197/f3p5/829	829	N	N	Y	Y
i0_HQ_N_c105377/f2p0/232	232	Y	Y	Y	Y	i0_HQ_C_c11205/f2p1/692	692	N	N	Y	Y
i0_HQ_N_c105381/f2p0/214	214	Y	Y	Y	Y	i0_HQ_C_c11221/f4p4/698	698	N	N	N	Y
i0_HQ_N_c105384/f2p0/232	232	Y	Y	Y	Y	i0_HQ_C_c11235/f9p3/637	637	N	N	Y	N
i0_HQ_N_c105388/f2p0/243	243	Y	Y	Y	Y	i0_HQ_C_c11237/f2p48/334	334	Y	Y	Y	Y
i0_HQ_N_c105392/f2p0/231	231	Y	Y	Y	Y	i0_HQ_C_c11241/f2p11/581	581	N	N	Y	Y
i0_HQ_N_c105393/f2p0/235	235	Y	Y	Y	Y	i0_HQ_C_c11242/f4p50/846	846	N	N	N	Y
i0_HQ_N_c105395/f2p0/270	270	Y	Y	Y	Y	i0_HQ_C_c11245/f2p0/362	362	Y	N	Y	Y
i0_HQ_N_c105403/f2p0/221	221	Y	Y	Y	Y	i0_HQ_C_c1125/f4p0/248	248	Y	Y	Y	Y
i0_HQ_N_c105408/f2p0/224	224	Y	Y	Y	Y	i0_HQ_C_c11251/f3p1/491	491	Y	Y	Y	Y
i0_HQ_N_c105415/f2p6/389	389	Y	Y	Y	Y	i0_HQ_C_c11275/f2p3/316	316	Y	Y	Y	Y
i0_HQ_N_c105425/f2p0/208	208	Y	Y	Y	Y	i0_HQ_C_c11288/f2p1/370	370	N	Y	Y	Y
i0_HQ_N_c105426/f2p3/858	858	N	N	N	Y	i0_HQ_C_c1129/f3p3/657	657	Y	N	Y	Y
i0_HQ_N_c105427/f3p0/296	296	Y	N	Y	Y	i0_HQ_C_c11297/f2p65/382	382	Y	Y	Y	Y
i0_HQ_N_c105429/f2p0/232	232	Y	Y	Y	Y	i0_HQ_C_c1131/f5p1/846	846	N	N	Y	Y
i0_HQ_N_c105433/f2p0/218	218	Y	Y	Y	Y	i0_HQ_C_c11315/f8p8/702	702	N	N	Y	Y
i0_HQ_N_c105434/f2p0/287	287	Y	N	Y	Y	i0_HQ_C_c11319/f2p1/618	618	N	N	N	Y
i0_HQ_N_c105437/f2p0/243	243	Y	Y	Y	Y	i0_HQ_C_c11324/f3p11/719	719	N	N	N	Y
i0_HQ_N_c105439/f2p0/236	236	N	Y	Y	Y	i0_HQ_C_c11332/f2p0/392	392	Y	Y	Y	Y
i0_HQ_N_c105444/f5p0/627	627	N	N	N	Y	i0_HQ_C_c11341/f3p2/820	820	N	N	Y	Y
i0_HQ_N_c105445/f2p0/238	238	Y	Y	Y	Y	i0_HQ_C_c11352/f2p5/421	421	N	N	Y	Y
i0_HQ_N_c105446/f2p0/215	215	Y	Y	Y	Y	i0_HQ_C_c11371/f3p2/610	610	N	N	Y	Y
i0_HQ_N_c105453/f2p0/295	295	Y	Y	Y	Y	i0_HQ_C_c11373/f2p0/276	276	Y	Y	Y	Y
i0_HQ_N_c105455/f2p0/223	223	Y	Y	Y	Y	i0_HQ_C_c11381/f4p4/598	598	Y	Y	Y	Y
i0_HQ_N_c105458/f2p1/354	354	Y	Y	Y	Y	i0_HQ_C_c11383/f3p2/617	617	N	Y	Y	Y
i0_HQ_N_c105459/f2p1/656	656	N	N	N	Y	i0_HQ_C_c11388/f2p3/718	718	N	N	N	Y
i0_HQ_N_c105461/f2p0/233	233	Y	Y	Y	Y	i0_HQ_C_c1139/f9p1/674	674	N	N	Y	Y
i0_HQ_N_c105467/f2p0/221	221	Y	Y	Y	Y	i0_HQ_C_c11391/f2p2/469	469	N	N	Y	Y
i0_HQ_N_c105470/f2p8/561	561	N	Y	Y	Y	i0_HQ_C_c11392/f4p3/479	479	N	N	Y	Y
i0_HQ_N_c105471/f2p0/238	238	Y	Y	Y	Y	i0_HQ_C_c11397/f2p0/537	537	N	N	Y	Y
i0_HQ_N_c105473/f2p0/225	225	Y	Y	Y	Y	i0_HQ_C_c11400/f2p2/657	657	N	N	Y	Y
i0_HQ_N_c105477/f2p0/216	216	Y	Y	Y	Y	i0_HQ_C_c11433/f3p0/683	683	Y	Y	Y	Y
i0_HQ_N_c105485/f2p0/227	227	Y	Y	Y	Y	i0_HQ_C_c11437/f3p0/323	323	Y	Y	Y	Y
i0_HQ_N_c105492/f2p1/331	331	Y	Y	Y	Y	i0_HQ_C_c1144/f9p2/875	875	N	N	Y	N
i0_HQ_N_c105496/f2p0/308	308	Y	N	Y	Y	i0_HQ_C_c11443/f2p2/691	691	N	N	Y	Y
i0_HQ_N_c105499/f2p0/216	216	Y	Y	Y	Y	i0_HQ_C_c1145/f5p1/523	523	N	N	N	Y
i0_HQ_N_c1055/f17p5/586	586	N	N	N	Y	i0_HQ_C_c11451/f2p2/751	751	N	N	Y	Y
i0_HQ_N_c105510/f2p0/231	231	Y	Y	Y	Y	i0_HQ_C_c11454/f2p0/461	461	Y	N	Y	Y
i0_HQ_N_c105517/f2p3/593	593	N	Y	Y	Y	i0_HQ_C_c11457/f2p2/342	342	Y	Y	Y	Y
i0_HQ_N_c10552/f4p0/573	573	Y	N	Y	Y	i0_HQ_C_c1146/f8p3/560	560	N	N	Y	Y
i0_HQ_N_c105521/f2p3/605	605	N	N	Y	Y	i0_HQ_C_c11479/f2p0/989	989	N	N	Y	N
i0_HQ_N_c105531/f2p1/740	740	N	N	Y	Y	i0_HQ_C_c1148/f7p5/829	829	N	N	Y	Y
i0_HQ_N_c105534/f2p5/317	317	Y	Y	Y	Y	i0_HQ_C_c1149/f3p1/450	450	Y	N	Y	Y
i0_HQ_N_c105545/f2p0/238	238	Y	Y	Y	Y	i0_HQ_C_c11491/f2p1/649	649	N	N	Y	Y
i0_HQ_N_c105548/f2p0/243	243	Y	Y	Y	Y	i0_HQ_C_c11497/f2p2/815	815	N	N	Y	Y
i0_HQ_N_c105553/f2p0/291	291	Y	Y	Y	Y	i0_HQ_C_c11503/f2p35/410	410	Y	Y	Y	Y
i0_HQ_N_c105555/f2p0/265	265	Y	Y	Y	Y	i0_HQ_C_c11519/f2p1/777	777	N	N	Y	Y
i0_HQ_N_c105557/f2p0/213	213	Y	Y	Y	Y	i0_HQ_C_c1152/f4p1/958	958	N	N	Y	Y
i0_HQ_N_c105566/f2p0/229	229	Y	N	Y	Y	i0_HQ_C_c11521/f2p0/289	289	Y	Y	Y	Y
i0_HQ_N_c105573/f2p0/232	232	Y	Y	Y	Y	i0_HQ_C_c11525/f2p4/574	574	N	N	N	Y
i0_HQ_N_c105576/f2p0/214	214	Y	Y	Y	Y	i0_HQ_C_c11530/f2p0/949	949	N	N	Y	Y
i0_HQ_N_c105579/f2p0/238	238	Y	Y	Y	Y	i0_HQ_C_c11560/f2p1/284	284	Y	Y	Y	Y
i0_HQ_N_c105584/f2p0/218	218	Y	Y	Y	Y	i0_HQ_C_c1157/f7p5/824	824	N	N	N	Y
i0_HQ_N_c105587/f2p0/223	223	Y	Y	Y	Y	i0_HQ_C_c11585/f3p1/873	873	N	N	N	Y
i0_HQ_N_c10566/f4p0/577	577	Y	N	Y	Y	i0_HQ_C_c11589/f6p25/494	494	N	N	Y	Y
i0_HQ_N_c105700/f2p0/236	236	Y	Y	Y	Y	i0_HQ_C_c11598/f3p0/763	763	N	N	Y	N
i0_HQ_N_c10578/f2p1/914	914	Y	N	N	Y	i0_HQ_C_c11606/f2p1/778	778	N	N	N	Y
i0_HQ_N_c10581/f2p3/417	417	N	N	Y	Y	i0_HQ_C_c1161/f5p2/743	743	N	N	Y	Y
i0_HQ_N_c10582/f8p3/624	624	N	N	N	Y	i0_HQ_C_c11610/f2p2/832	832	N	N	N	Y
i0_HQ_N_c10588/f3p1/305	305	Y	Y	Y	Y	i0_HQ_C_c1163/f5p44/893	893	N	N	N	Y
i0_HQ_N_c105904/f2p0/281	281	Y	Y	Y	Y	i0_HQ_C_c11639/f2p0/938	938	N	N	Y	N
i0_HQ_N_c10593/f3p0/424	424	N	N	Y	Y	i0_HQ_C_c11645/f2p0/295	295	Y	Y	Y	Y
i0_HQ_N_c10594/f3p6/752	752	N	N	N	Y	i0_HQ_C_c11659/f2p0/338	338	Y	Y	Y	Y
i0_HQ_N_c10597/f3p0/325	325	Y	N	Y	Y	i0_HQ_C_c11672/f2p0/747	747	Y	N	N	Y
i0_HQ_N_c106/f39p8/534	534	N	N	Y	Y	i0_HQ_C_c1168/f8p3/795	795	N	N	Y	Y
i0_HQ_N_c10602/f2p0/537	537	N	N	Y	Y	i0_HQ_C_c11681/f3p0/782	782	N	Y	Y	Y
i0_HQ_N_c10603/f5p5/662	662	N	N	N	Y	i0_HQ_C_c11686/f4p0/513	513	Y	Y	Y	Y
i0_HQ_N_c1062/f19p15/823	823	N	N	N	Y	i0_HQ_C_c11687/f4p3/805	805	N	N	N	Y
i0_HQ_N_c1063/f16p5/785	785	N	N	N	Y	i0_HQ_C_c11704/f2p2/630	630	N	N	Y	N
i0_HQ_N_c10631/f2p3/635	635	Y	N	N	Y	i0_HQ_C_c11729/f2p2/795	795	N	N	N	Y
i0_HQ_N_c106383/f2p1/693	693	N	N	Y	Y	i0_HQ_C_c11735/f2p0/583	583	Y	Y	Y	Y
i0_HQ_N_c10643/f4p0/612	612	N	N	Y	Y	i0_HQ_C_c11740/f2p1/569	569	N	N	N	Y
i0_HQ_N_c1065/f7p0/456	456	Y	Y	Y	Y	i0_HQ_C_c11749/f4p0/897	897	N	N	Y	N
i0_HQ_N_c10655/f2p0/660	660	Y	Y	Y	Y	i0_HQ_C_c1176/f8p5/852	852	N	N	Y	Y
i0_HQ_N_c106555/f2p0/255	255	Y	Y	Y	Y	i0_HQ_C_c11768/f3p0/287	287	Y	Y	Y	Y
i0_HQ_N_c10660/f3p4/905	905	N	N	Y	Y	i0_HQ_C_c1177/f5p2/1003	1003	N	N	Y	Y
i0_HQ_N_c106714/f2p1/655	655	Y	N	Y	Y	i0_HQ_C_c11770/f3p1/967	967	N	N	N	Y
i0_HQ_N_c10674/f2p1/498	498	Y	N	Y	Y	i0_HQ_C_c11773/f2p4/314	314	Y	Y	Y	Y
i0_HQ_N_c106817/f2p1/968	968	N	N	Y	N	i0_HQ_C_c11776/f2p2/841	841	N	N	N	Y
i0_HQ_N_c10684/f2p0/327	327	Y	Y	Y	Y	i0_HQ_C_c1178/f8p2/621	621	N	N	N	Y
i0_HQ_N_c10691/f3p8/622	622	N	N	Y	Y	i0_HQ_C_c11780/f3p2/685	685	Y	Y	Y	Y
i0_HQ_N_c106924/f2p3/770	770	N	N	N	Y	i0_HQ_C_c11781/f2p2/702	702	N	N	Y	Y
i0_HQ_N_c10701/f2p8/597	597	N	N	Y	Y	i0_HQ_C_c1179/f3p3/906	906	N	N	N	Y
i0_HQ_N_c10706/f2p0/708	708	N	N	Y	Y	i0_HQ_C_c11793/f2p0/277	277	Y	Y	Y	Y
i0_HQ_N_c107181/f2p1/794	794	N	N	Y	Y	i0_HQ_C_c118/f34p21/924	924	N	N	Y	Y
i0_HQ_N_c1073/f5p0/716	716	N	N	N	Y	i0_HQ_C_c11806/f2p5/991	991	N	N	Y	Y
i0_HQ_N_c10731/f2p1/433	433	Y	Y	Y	Y	i0_HQ_C_c11807/f2p2/464	464	N	N	Y	Y
i0_HQ_N_c107347/f2p0/261	261	Y	N	Y	Y	i0_HQ_C_c11812/f2p2/497	497	Y	N	Y	Y
i0_HQ_N_c10736/f2p0/529	529	N	N	Y	Y	i0_HQ_C_c11815/f2p0/731	731	N	N	Y	Y
i0_HQ_N_c10740/f2p0/955	955	N	N	N	Y	i0_HQ_C_c11818/f2p5/906	906	N	N	Y	N
i0_HQ_N_c10744/f2p1/897	897	Y	N	N	Y	i0_HQ_C_c1183/f10p7/921	921	N	N	Y	N
i0_HQ_N_c10745/f2p423/908	908	Y	N	Y	Y	i0_HQ_C_c11832/f2p1/570	570	N	N	Y	Y
i0_HQ_N_c10752/f2p2/748	748	N	N	Y	Y	i0_HQ_C_c11833/f2p2/831	831	N	N	Y	Y
i0_HQ_N_c10756/f2p14/397	397	Y	N	Y	Y	i0_HQ_C_c11835/f7p0/572	572	N	N	Y	Y
i0_HQ_N_c1076/f20p4/676	676	N	N	Y	Y	i0_HQ_C_c1184/f4p4/627	627	N	N	Y	Y
i0_HQ_N_c1077/f8p5/952	952	N	N	Y	Y	i0_HQ_C_c11849/f2p2/743	743	N	N	Y	Y
i0_HQ_N_c10773/f12p7/567	567	N	N	Y	Y	i0_HQ_C_c11852/f2p0/605	605	N	N	Y	Y
i0_HQ_N_c10776/f2p3/601	601	Y	N	Y	Y	i0_HQ_C_c11856/f5p4/690	690	N	N	Y	N
i0_HQ_N_c107776/f2p0/216	216	Y	Y	Y	Y	i0_HQ_C_c11857/f3p7/596	596	N	N	Y	Y
i0_HQ_N_c10786/f5p1/855	855	N	N	Y	N	i0_HQ_C_c11864/f2p4/467	467	Y	N	Y	Y
i0_HQ_N_c10789/f5p1/651	651	N	N	N	Y	i0_HQ_C_c11865/f5p17/503	503	Y	Y	Y	Y
i0_HQ_N_c1079/f4p0/867	867	N	N	N	Y	i0_HQ_C_c11871/f4p3/453	453	N	N	N	Y
i0_HQ_N_c10791/f2p0/562	562	Y	Y	Y	Y	i0_HQ_C_c11877/f2p5/822	822	N	N	N	Y
i0_HQ_N_c1080/f3p1/499	499	N	Y	Y	Y	i0_HQ_C_c1188/f3p0/523	523	N	N	Y	Y
i0_HQ_N_c10800/f3p0/668	668	N	N	N	Y	i0_HQ_C_c11886/f9p4/823	823	N	N	Y	N
i0_HQ_N_c108074/f2p3/513	513	Y	N	N	Y	i0_HQ_C_c1191/f3p2/434	434	N	N	Y	Y
i0_HQ_N_c10808/f2p1/562	562	Y	Y	Y	Y	i0_HQ_C_c11918/f2p4/708	708	N	N	Y	Y
i0_HQ_N_c10809/f5p1/897	897	N	N	Y	N	i0_HQ_C_c11923/f2p0/556	556	N	N	Y	Y
i0_HQ_N_c10814/f2p4/495	495	Y	N	Y	Y	i0_HQ_C_c11944/f2p1/596	596	N	N	Y	Y
i0_HQ_N_c1082/f4p10/797	797	N	N	N	Y	i0_HQ_C_c1195/f7p3/618	618	N	N	N	Y
i0_HQ_N_c10821/f2p0/670	670	Y	N	Y	Y	i0_HQ_C_c1197/f6p6/938	938	N	N	N	Y
i0_HQ_N_c108228/f2p0/271	271	Y	Y	Y	Y	i0_HQ_C_c11987/f3p6/574	574	N	N	Y	Y
i0_HQ_N_c1083/f18p5/934	934	N	N	Y	N	i0_HQ_C_c1199/f2p1/632	632	N	N	N	Y
i0_HQ_N_c10833/f6p0/569	569	Y	N	Y	Y	i0_HQ_C_c1201/f4p1/863	863	N	N	N	Y
i0_HQ_N_c10834/f3p0/590	590	N	N	Y	Y	i0_HQ_C_c12013/f2p0/728	728	N	Y	Y	Y
i0_HQ_N_c10839/f4p2/856	856	N	N	Y	Y	i0_HQ_C_c12014/f2p0/300	300	Y	Y	Y	Y
i0_HQ_N_c1084/f5p5/486	486	N	N	Y	Y	i0_HQ_C_c12015/f3p12/693	693	Y	N	N	Y
i0_HQ_N_c108440/f2p2/426	426	Y	Y	Y	Y	i0_HQ_C_c12020/f2p0/276	276	Y	Y	Y	Y
i0_HQ_N_c10846/f2p0/573	573	N	N	N	Y	i0_HQ_C_c12021/f2p2/648	648	N	N	N	Y
i0_HQ_N_c10851/f7p3/862	862	N	N	N	Y	i0_HQ_C_c12041/f8p2/782	782	N	N	N	Y
i0_HQ_N_c1087/f11p10/596	596	N	N	Y	Y	i0_HQ_C_c12043/f9p3/607	607	N	Y	Y	Y
i0_HQ_N_c10873/f2p7/553	553	N	N	N	Y	i0_HQ_C_c12048/f2p0/681	681	N	N	N	Y
i0_HQ_N_c10879/f3p3/755	755	N	N	Y	Y	i0_HQ_C_c12054/f2p4/864	864	N	N	Y	Y
i0_HQ_N_c10895/f2p2/785	785	N	N	Y	N	i0_HQ_C_c1206/f3p2/607	607	N	N	Y	Y
i0_HQ_N_c1091/f5p1/631	631	N	N	Y	Y	i0_HQ_C_c12086/f5p5/655	655	N	N	N	Y
i0_HQ_N_c10918/f2p4/682	682	N	N	Y	Y	i0_HQ_C_c12095/f2p0/672	672	N	N	N	Y
i0_HQ_N_c10922/f3p3/968	968	N	N	Y	Y	i0_HQ_C_c1210/f5p3/696	696	Y	Y	Y	N
i0_HQ_N_c10923/f3p2/617	617	N	N	N	Y	i0_HQ_C_c12108/f2p5/467	467	N	N	Y	Y
i0_HQ_N_c1094/f9p2/534	534	N	N	Y	Y	i0_HQ_C_c12112/f2p1/526	526	N	N	Y	Y
i0_HQ_N_c10940/f7p3/614	614	N	N	Y	Y	i0_HQ_C_c12116/f2p47/914	914	N	N	N	Y
i0_HQ_N_c10944/f3p1/974	974	N	N	Y	Y	i0_HQ_C_c12121/f2p2/691	691	N	N	Y	Y
i0_HQ_N_c109478/f2p1/470	470	Y	N	Y	Y	i0_HQ_C_c12125/f4p22/516	516	Y	N	Y	Y
i0_HQ_N_c10956/f2p1/884	884	N	N	N	Y	i0_HQ_C_c12132/f2p2/364	364	N	N	Y	Y
i0_HQ_N_c10976/f2p6/525	525	N	Y	Y	Y	i0_HQ_C_c12152/f2p7/579	579	N	N	Y	Y
i0_HQ_N_c109823/f2p10/489	489	Y	N	Y	Y	i0_HQ_C_c1217/f9p8/722	722	N	N	N	Y
i0_HQ_N_c10983/f2p0/572	572	Y	Y	Y	Y	i0_HQ_C_c1218/f5p0/352	352	N	Y	Y	Y
i0_HQ_N_c10990/f6p2/597	597	N	N	N	Y	i0_HQ_C_c12187/f2p47/838	838	N	N	N	Y
i0_HQ_N_c10998/f3p43/761	761	N	N	Y	Y	i0_HQ_C_c12191/f5p1/831	831	N	N	N	Y
i0_HQ_N_c10999/f2p0/900	900	Y	N	Y	Y	i0_HQ_C_c1221/f9p6/776	776	N	N	N	Y
i0_HQ_N_c1100/f3p2/805	805	N	Y	Y	Y	i0_HQ_C_c12218/f2p30/498	498	Y	N	Y	Y
i0_HQ_N_c11006/f3p1/360	360	Y	Y	Y	Y	i0_HQ_C_c12219/f3p0/636	636	N	Y	Y	Y
i0_HQ_N_c1101/f4p1/492	492	Y	N	N	Y	i0_HQ_C_c12220/f2p2/362	362	Y	Y	Y	Y
i0_HQ_N_c110155/f2p0/231	231	Y	Y	Y	Y	i0_HQ_C_c12227/f3p2/817	817	N	N	N	Y
i0_HQ_N_c1102/f5p3/570	570	N	N	N	Y	i0_HQ_C_c12230/f2p4/582	582	N	N	N	Y
i0_HQ_N_c11029/f3p1/795	795	N	N	Y	N	i0_HQ_C_c12235/f3p1/812	812	N	N	Y	N
i0_HQ_N_c11032/f3p0/505	505	N	N	Y	Y	i0_HQ_C_c1224/f16p6/738	738	N	N	N	Y
i0_HQ_N_c11034/f3p4/670	670	N	N	Y	Y	i0_HQ_C_c12242/f2p77/971	971	N	N	N	Y
i0_HQ_N_c11039/f2p2/849	849	N	N	Y	N	i0_HQ_C_c1225/f3p7/733	733	N	N	Y	Y
i0_HQ_N_c11043/f2p2/710	710	N	N	N	Y	i0_HQ_C_c12258/f2p0/429	429	Y	Y	Y	Y
i0_HQ_N_c1105/f25p9/790	790	N	N	Y	N	i0_HQ_C_c1226/f8p0/734	734	Y	Y	Y	Y
i0_HQ_N_c11057/f2p62/704	704	N	N	N	Y	i0_HQ_C_c12271/f2p2/682	682	N	N	Y	Y
i0_HQ_N_c1106/f6p6/560	560	N	N	Y	Y	i0_HQ_C_c1230/f6p33/668	668	Y	N	N	Y
i0_HQ_N_c11070/f2p3/380	380	Y	Y	Y	Y	i0_HQ_C_c12308/f2p6/820	820	N	Y	Y	Y
i0_HQ_N_c11073/f2p1/326	326	Y	Y	Y	Y	i0_HQ_C_c12313/f3p2/607	607	N	N	Y	Y
i0_HQ_N_c1108/f6p4/984	984	N	N	Y	N	i0_HQ_C_c12324/f2p8/549	549	Y	Y	Y	Y
i0_HQ_N_c11093/f3p1/524	524	N	N	Y	Y	i0_HQ_C_c12326/f3p13/700	700	N	N	N	Y
i0_HQ_N_c11095/f4p0/307	307	Y	Y	Y	Y	i0_HQ_C_c1235/f11p3/597	597	N	N	Y	N
i0_HQ_N_c110954/f2p0/239	239	Y	Y	Y	Y	i0_HQ_C_c1236/f3p5/615	615	N	N	Y	Y
i0_HQ_N_c11104/f4p2/562	562	N	N	Y	Y	i0_HQ_C_c12369/f3p0/683	683	N	N	Y	Y
i0_HQ_N_c111049/f2p1/368	368	N	Y	Y	Y	i0_HQ_C_c12374/f2p1/435	435	Y	Y	Y	Y
i0_HQ_N_c11117/f3p2/776	776	N	Y	Y	Y	i0_HQ_C_c1238/f4p0/897	897	N	N	N	Y
i0_HQ_N_c111202/f2p0/228	228	Y	Y	Y	Y	i0_HQ_C_c12383/f2p2/354	354	Y	Y	Y	Y
i0_HQ_N_c11126/f3p5/742	742	N	N	N	Y	i0_HQ_C_c12392/f2p0/486	486	N	Y	N	Y
i0_HQ_N_c111278/f2p7/549	549	N	N	Y	Y	i0_HQ_C_c12395/f2p30/482	482	N	N	Y	Y
i0_HQ_N_c11128/f2p1/426	426	Y	N	Y	Y	i0_HQ_C_c12398/f6p6/662	662	N	N	Y	Y
i0_HQ_N_c111288/f2p0/687	687	N	N	Y	Y	i0_HQ_C_c1240/f4p4/857	857	N	Y	Y	N
i0_HQ_N_c1113/f7p2/675	675	N	N	N	Y	i0_HQ_C_c12400/f2p0/769	769	N	Y	Y	Y
i0_HQ_N_c11130/f3p7/523	523	N	N	Y	Y	i0_HQ_C_c1242/f5p8/456	456	N	N	Y	Y
i0_HQ_N_c11139/f3p8/884	884	N	N	Y	N	i0_HQ_C_c12426/f2p1/748	748	Y	N	Y	Y
i0_HQ_N_c11142/f3p0/756	756	N	N	Y	Y	i0_HQ_C_c12446/f5p5/759	759	N	Y	Y	Y
i0_HQ_N_c11155/f7p2/991	991	N	N	N	Y	i0_HQ_C_c12452/f3p0/337	337	Y	Y	Y	Y
i0_HQ_N_c11156/f11p1/487	487	N	Y	Y	Y	i0_HQ_C_c12478/f2p6/331	331	N	N	Y	Y
i0_HQ_N_c11158/f2p1/524	524	N	Y	Y	Y	i0_HQ_C_c12479/f2p14/615	615	N	N	N	Y
i0_HQ_N_c1116/f4p1/878	878	N	N	N	Y	i0_HQ_C_c12486/f2p0/619	619	N	Y	Y	Y
i0_HQ_N_c11162/f7p2/728	728	N	N	Y	Y	i0_HQ_C_c1249/f4p2/690	690	N	N	Y	Y
i0_HQ_N_c11165/f2p1/547	547	N	N	Y	N	i0_HQ_C_c12497/f2p0/447	447	Y	Y	Y	Y
i0_HQ_N_c11170/f2p0/948	948	N	Y	Y	Y	i0_HQ_C_c1250/f5p2/513	513	N	N	Y	Y
i0_HQ_N_c11174/f15p6/651	651	N	N	N	Y	i0_HQ_C_c12520/f2p0/300	300	Y	N	Y	Y
i0_HQ_N_c1118/f15p2/733	733	N	N	N	Y	i0_HQ_C_c12525/f2p0/615	615	N	N	Y	Y
i0_HQ_N_c11180/f3p1/569	569	N	N	Y	Y	i0_HQ_C_c12553/f2p2/575	575	N	N	N	Y
i0_HQ_N_c111823/f2p3/539	539	N	N	N	Y	i0_HQ_C_c12554/f2p3/654	654	N	N	N	Y
i0_HQ_N_c11188/f2p0/724	724	N	N	N	Y	i0_HQ_C_c12560/f3p1/931	931	N	N	Y	N
i0_HQ_N_c1120/f5p0/908	908	N	N	Y	Y	i0_HQ_C_c12570/f2p4/389	389	Y	Y	Y	Y
i0_HQ_N_c11209/f2p2/696	696	N	N	Y	Y	i0_HQ_C_c12573/f3p1/372	372	N	Y	Y	Y
i0_HQ_N_c1121/f12p5/874	874	N	N	N	Y	i0_HQ_C_c12578/f2p0/501	501	N	N	Y	Y
i0_HQ_N_c11211/f2p2/670	670	N	N	N	Y	i0_HQ_C_c12579/f3p0/287	287	Y	Y	Y	Y
i0_HQ_N_c11213/f2p2/353	353	Y	Y	Y	Y	i0_HQ_C_c12581/f2p0/313	313	Y	Y	Y	Y
i0_HQ_N_c112153/f2p2/372	372	N	N	Y	Y	i0_HQ_C_c1259/f5p40/773	773	Y	N	Y	N
i0_HQ_N_c112192/f2p0/412	412	Y	N	Y	Y	i0_HQ_C_c12591/f3p4/988	988	N	Y	Y	Y
i0_HQ_N_c112342/f2p4/372	372	Y	Y	Y	Y	i0_HQ_C_c12592/f2p1/660	660	N	N	N	Y
i0_HQ_N_c112378/f2p3/577	577	N	N	N	Y	i0_HQ_C_c12597/f3p1/977	977	N	N	Y	Y
i0_HQ_N_c1124/f16p1/854	854	N	N	Y	N	i0_HQ_C_c12603/f2p2/706	706	N	N	N	Y
i0_HQ_N_c11242/f3p0/892	892	N	N	Y	N	i0_HQ_C_c12608/f2p1/992	992	N	N	N	Y
i0_HQ_N_c11254/f6p2/671	671	Y	N	Y	Y	i0_HQ_C_c12620/f2p0/593	593	N	N	N	Y
i0_HQ_N_c1126/f10p2/657	657	N	N	Y	Y	i0_HQ_C_c12621/f2p10/888	888	Y	N	Y	N
i0_HQ_N_c112624/f2p0/426	426	N	N	Y	Y	i0_HQ_C_c12623/f2p0/633	633	N	N	N	Y
i0_HQ_N_c11263/f4p3/958	958	N	N	Y	Y	i0_HQ_C_c1263/f8p1/683	683	Y	Y	Y	Y
i0_HQ_N_c11266/f2p1/605	605	Y	Y	Y	Y	i0_HQ_C_c12631/f6p1/930	930	N	N	Y	N
i0_HQ_N_c11269/f2p7/413	413	N	Y	Y	Y	i0_HQ_C_c1264/f5p2/479	479	N	N	Y	Y
i0_HQ_N_c11273/f9p2/449	449	Y	Y	Y	Y	i0_HQ_C_c12647/f2p0/341	341	Y	Y	Y	Y
i0_HQ_N_c11274/f2p2/697	697	Y	N	Y	Y	i0_HQ_C_c1265/f6p1/613	613	N	N	N	Y
i0_HQ_N_c11276/f3p0/523	523	N	Y	Y	Y	i0_HQ_C_c12650/f2p3/861	861	N	N	Y	Y
i0_HQ_N_c11278/f3p1/457	457	Y	Y	Y	Y	i0_HQ_C_c12654/f2p0/840	840	N	N	N	Y
i0_HQ_N_c11291/f2p0/505	505	Y	N	Y	Y	i0_HQ_C_c1267/f4p1/549	549	N	N	N	Y
i0_HQ_N_c113014/f2p7/365	365	Y	Y	Y	Y	i0_HQ_C_c1268/f7p0/907	907	N	Y	Y	Y
i0_HQ_N_c1131/f5p1/787	787	N	N	N	Y	i0_HQ_C_c12694/f2p4/500	500	N	N	Y	Y
i0_HQ_N_c113179/f2p0/219	219	Y	Y	Y	Y	i0_HQ_C_c12697/f4p3/464	464	N	N	Y	Y
i0_HQ_N_c1132/f9p4/987	987	N	N	N	Y	i0_HQ_C_c12701/f7p3/675	675	N	N	N	Y
i0_HQ_N_c11321/f2p4/761	761	N	Y	N	Y	i0_HQ_C_c12704/f5p0/623	623	Y	N	Y	Y
i0_HQ_N_c11331/f6p0/716	716	N	N	Y	Y	i0_HQ_C_c12708/f2p20/591	591	Y	N	N	Y
i0_HQ_N_c113319/f2p0/272	272	Y	Y	Y	Y	i0_HQ_C_c12713/f4p12/440	440	N	N	Y	Y
i0_HQ_N_c113342/f2p2/560	560	N	N	Y	Y	i0_HQ_C_c1272/f8p5/699	699	N	N	N	Y
i0_HQ_N_c113390/f2p0/285	285	Y	Y	Y	Y	i0_HQ_C_c12723/f2p0/642	642	N	N	N	Y
i0_HQ_N_c11343/f2p0/666	666	Y	Y	Y	Y	i0_HQ_C_c1273/f5p7/645	645	N	N	N	Y
i0_HQ_N_c11354/f11p3/828	828	N	N	Y	Y	i0_HQ_C_c12743/f6p3/514	514	N	N	N	Y
i0_HQ_N_c1136/f4p0/835	835	N	N	Y	Y	i0_HQ_C_c1275/f7p2/597	597	N	N	N	Y
i0_HQ_N_c11367/f3p4/671	671	N	N	Y	Y	i0_HQ_C_c12753/f2p5/910	910	N	N	Y	Y
i0_HQ_N_c1137/f3p3/969	969	N	N	Y	Y	i0_HQ_C_c12760/f2p0/341	341	Y	N	Y	Y
i0_HQ_N_c113767/f2p61/597	597	N	N	N	Y	i0_HQ_C_c12769/f2p37/858	858	Y	Y	N	Y
i0_HQ_N_c113777/f2p0/223	223	Y	Y	Y	Y	i0_HQ_C_c1277/f8p0/805	805	N	N	Y	Y
i0_HQ_N_c113845/f2p0/696	696	N	N	Y	N	i0_HQ_C_c1278/f4p5/649	649	N	N	Y	Y
i0_HQ_N_c1139/f5p1/708	708	N	N	N	Y	i0_HQ_C_c12782/f3p9/437	437	Y	Y	Y	Y
i0_HQ_N_c11390/f3p0/822	822	N	N	N	Y	i0_HQ_C_c12788/f2p4/436	436	Y	Y	Y	Y
i0_HQ_N_c11405/f2p2/579	579	N	N	Y	Y	i0_HQ_C_c12796/f3p0/592	592	N	Y	Y	Y
i0_HQ_N_c114147/f2p0/594	594	N	N	Y	Y	i0_HQ_C_c12810/f2p1/326	326	Y	Y	Y	Y
i0_HQ_N_c11420/f3p0/540	540	Y	Y	Y	Y	i0_HQ_C_c12816/f2p1/309	309	N	Y	Y	Y
i0_HQ_N_c11422/f2p3/580	580	Y	Y	Y	Y	i0_HQ_C_c12822/f2p7/808	808	N	N	N	Y
i0_HQ_N_c11426/f3p5/477	477	Y	N	Y	Y	i0_HQ_C_c12826/f2p0/652	652	N	N	Y	Y
i0_HQ_N_c11427/f2p1/537	537	N	N	Y	Y	i0_HQ_C_c12831/f2p0/1006	1006	N	N	N	Y
i0_HQ_N_c114342/f2p1/789	789	N	N	Y	N	i0_HQ_C_c12834/f2p0/364	364	Y	Y	Y	Y
i0_HQ_N_c11438/f3p0/717	717	N	N	N	Y	i0_HQ_C_c12839/f4p5/630	630	N	N	N	Y
i0_HQ_N_c11448/f3p1/485	485	N	Y	Y	Y	i0_HQ_C_c1284/f3p13/418	418	Y	Y	Y	Y
i0_HQ_N_c11463/f4p3/401	401	Y	N	Y	Y	i0_HQ_C_c12842/f6p0/671	671	N	N	Y	Y
i0_HQ_N_c11477/f3p3/744	744	N	N	N	Y	i0_HQ_C_c12847/f2p0/540	540	Y	Y	Y	Y
i0_HQ_N_c11482/f2p0/847	847	N	Y	Y	Y	i0_HQ_C_c12855/f2p3/701	701	N	N	N	Y
i0_HQ_N_c11493/f10p2/519	519	N	N	Y	Y	i0_HQ_C_c12856/f2p3/492	492	Y	Y	Y	Y
i0_HQ_N_c11495/f2p3/811	811	N	N	N	Y	i0_HQ_C_c12858/f6p4/960	960	N	N	N	Y
i0_HQ_N_c11496/f5p4/508	508	N	N	N	Y	i0_HQ_C_c1286/f9p1/696	696	N	N	N	Y
i0_HQ_N_c114972/f2p6/668	668	Y	N	Y	Y	i0_HQ_C_c12872/f3p2/960	960	N	N	N	Y
i0_HQ_N_c11523/f2p0/356	356	Y	N	Y	Y	i0_HQ_C_c12874/f3p3/911	911	N	N	N	Y
i0_HQ_N_c11529/f2p0/473	473	Y	N	Y	Y	i0_HQ_C_c1288/f7p3/630	630	N	N	N	Y
i0_HQ_N_c11530/f2p0/797	797	N	Y	Y	Y	i0_HQ_C_c12886/f2p10/802	802	N	N	Y	N
i0_HQ_N_c115337/f43p2/762	762	N	N	Y	N	i0_HQ_C_c12893/f2p4/1029	1029	N	N	N	Y
i0_HQ_N_c115339/f19p0/600	600	N	Y	Y	Y	i0_HQ_C_c1290/f8p2/308	308	Y	N	Y	Y
i0_HQ_N_c115342/f14p1/982	982	N	N	N	Y	i0_HQ_C_c12915/f2p1/349	349	Y	Y	Y	Y
i0_HQ_N_c115344/f18p4/481	481	N	N	Y	Y	i0_HQ_C_c12936/f5p0/455	455	N	Y	Y	Y
i0_HQ_N_c115347/f33p1/349	349	Y	Y	Y	Y	i0_HQ_C_c12941/f2p3/359	359	N	N	Y	Y
i0_HQ_N_c115349/f10p2/532	532	N	N	Y	Y	i0_HQ_C_c12942/f2p0/643	643	Y	Y	Y	Y
i0_HQ_N_c115359/f16p1/551	551	N	N	N	Y	i0_HQ_C_c12950/f2p8/692	692	N	N	Y	Y
i0_HQ_N_c115363/f14p5/589	589	N	Y	Y	Y	i0_HQ_C_c12951/f2p0/394	394	N	N	Y	Y
i0_HQ_N_c115365/f3p4/580	580	N	N	Y	Y	i0_HQ_C_c12959/f3p1/948	948	N	N	N	Y
i0_HQ_N_c115366/f12p11/860	860	N	N	Y	Y	i0_HQ_C_c1298/f9p6/791	791	N	N	Y	N
i0_HQ_N_c115367/f8p3/978	978	N	N	N	Y	i0_HQ_C_c12987/f2p1/368	368	Y	Y	Y	Y
i0_HQ_N_c115368/f11p3/680	680	Y	Y	N	Y	i0_HQ_C_c12992/f2p0/571	571	N	N	Y	Y
i0_HQ_N_c115370/f11p4/917	917	N	N	N	Y	i0_HQ_C_c12994/f5p3/1000	1000	N	N	N	Y
i0_HQ_N_c115371/f10p18/980	980	N	N	N	Y	i0_HQ_C_c12997/f2p45/622	622	Y	N	N	Y
i0_HQ_N_c115372/f15p2/573	573	N	Y	Y	Y	i0_HQ_C_c13001/f2p3/708	708	N	N	Y	Y
i0_HQ_N_c115377/f12p9/782	782	N	N	Y	Y	i0_HQ_C_c13002/f2p1/801	801	N	N	Y	Y
i0_HQ_N_c115379/f6p43/579	579	Y	N	N	Y	i0_HQ_C_c13017/f2p0/709	709	N	N	N	Y
i0_HQ_N_c115382/f5p3/821	821	N	N	N	Y	i0_HQ_C_c13019/f2p1/350	350	Y	Y	Y	Y
i0_HQ_N_c115384/f20p3/714	714	Y	N	N	Y	i0_HQ_C_c13024/f4p0/424	424	N	N	Y	Y
i0_HQ_N_c115386/f8p4/995	995	N	N	Y	Y	i0_HQ_C_c13031/f2p7/487	487	Y	N	Y	Y
i0_HQ_N_c115388/f13p57/892	892	Y	N	N	Y	i0_HQ_C_c13048/f3p6/440	440	Y	Y	Y	Y
i0_HQ_N_c115389/f5p12/705	705	N	N	Y	Y	i0_HQ_C_c13057/f2p5/479	479	N	Y	Y	Y
i0_HQ_N_c115396/f8p1/526	526	N	N	Y	Y	i0_HQ_C_c13058/f2p2/307	307	Y	Y	Y	Y
i0_HQ_N_c115397/f4p13/544	544	N	N	Y	Y	i0_HQ_C_c13063/f2p4/666	666	N	N	N	Y
i0_HQ_N_c11540/f2p2/946	946	N	N	Y	N	i0_HQ_C_c13068/f3p4/834	834	N	N	N	Y
i0_HQ_N_c115407/f7p3/711	711	N	N	N	Y	i0_HQ_C_c13081/f2p3/422	422	N	N	Y	Y
i0_HQ_N_c115408/f3p8/642	642	N	N	N	Y	i0_HQ_C_c13091/f2p0/721	721	N	N	N	Y
i0_HQ_N_c115414/f6p2/451	451	N	N	N	Y	i0_HQ_C_c13102/f2p6/337	337	Y	Y	Y	Y
i0_HQ_N_c115419/f6p1/452	452	N	Y	Y	Y	i0_HQ_C_c13107/f3p1/857	857	N	N	Y	Y
i0_HQ_N_c115422/f8p16/822	822	N	N	Y	Y	i0_HQ_C_c1311/f4p3/699	699	N	N	Y	Y
i0_HQ_N_c115424/f7p1/508	508	Y	N	Y	Y	i0_HQ_C_c13125/f2p1/918	918	N	N	N	Y
i0_HQ_N_c115428/f2p0/259	259	Y	Y	Y	Y	i0_HQ_C_c13138/f2p10/868	868	Y	Y	Y	Y
i0_HQ_N_c115430/f6p1/764	764	Y	N	Y	Y	i0_HQ_C_c13139/f3p7/873	873	N	N	N	Y
i0_HQ_N_c115436/f8p5/722	722	N	N	N	Y	i0_HQ_C_c1314/f11p3/908	908	N	N	Y	Y
i0_HQ_N_c115439/f5p1/495	495	N	N	Y	Y	i0_HQ_C_c13140/f2p0/474	474	Y	Y	Y	Y
i0_HQ_N_c115444/f10p2/919	919	N	Y	Y	Y	i0_HQ_C_c13146/f3p0/390	390	Y	Y	Y	Y
i0_HQ_N_c115445/f8p4/918	918	N	N	N	Y	i0_HQ_C_c13147/f7p7/649	649	N	N	N	Y
i0_HQ_N_c115454/f2p0/243	243	Y	Y	Y	Y	i0_HQ_C_c13157/f2p0/272	272	N	Y	Y	Y
i0_HQ_N_c115457/f2p0/271	271	Y	Y	Y	Y	i0_HQ_C_c13163/f3p1/440	440	Y	N	Y	Y
i0_HQ_N_c115458/f16p1/465	465	N	N	Y	Y	i0_HQ_C_c13174/f3p3/463	463	N	N	Y	Y
i0_HQ_N_c115464/f7p4/702	702	N	N	N	Y	i0_HQ_C_c13180/f4p7/337	337	Y	N	Y	Y
i0_HQ_N_c115465/f23p12/855	855	N	N	N	Y	i0_HQ_C_c13182/f3p0/746	746	N	N	Y	Y
i0_HQ_N_c115472/f7p2/901	901	N	N	N	Y	i0_HQ_C_c13187/f3p6/572	572	N	N	Y	Y
i0_HQ_N_c115473/f11p6/553	553	N	N	N	Y	i0_HQ_C_c1319/f4p2/537	537	N	N	Y	Y
i0_HQ_N_c115474/f4p3/568	568	N	N	N	Y	i0_HQ_C_c13197/f3p2/999	999	N	N	N	Y
i0_HQ_N_c115479/f12p2/755	755	N	N	N	Y	i0_HQ_C_c13205/f2p13/630	630	Y	N	Y	Y
i0_HQ_N_c115482/f2p5/604	604	N	N	Y	Y	i0_HQ_C_c13212/f2p1/932	932	Y	Y	Y	Y
i0_HQ_N_c115484/f9p3/569	569	N	N	Y	Y	i0_HQ_C_c13215/f3p1/352	352	Y	Y	Y	Y
i0_HQ_N_c115490/f2p0/238	238	Y	Y	Y	Y	i0_HQ_C_c1322/f8p1/933	933	N	N	N	Y
i0_HQ_N_c115492/f4p4/432	432	Y	N	Y	Y	i0_HQ_C_c13222/f2p0/530	530	N	Y	Y	Y
i0_HQ_N_c115493/f4p1/899	899	N	N	Y	Y	i0_HQ_C_c1323/f8p3/666	666	N	N	Y	Y
i0_HQ_N_c115502/f3p0/269	269	Y	Y	Y	Y	i0_HQ_C_c13242/f2p8/855	855	N	N	N	Y
i0_HQ_N_c115504/f19p15/804	804	N	N	N	Y	i0_HQ_C_c13247/f2p0/844	844	N	N	N	Y
i0_HQ_N_c115507/f3p4/314	314	N	Y	Y	Y	i0_HQ_C_c1325/f3p0/234	234	Y	Y	Y	Y
i0_HQ_N_c115509/f2p0/222	222	Y	Y	Y	Y	i0_HQ_C_c13261/f2p2/642	642	N	N	Y	Y
i0_HQ_N_c115510/f3p0/253	253	Y	N	Y	Y	i0_HQ_C_c1327/f3p0/743	743	N	Y	N	Y
i0_HQ_N_c115515/f13p8/954	954	N	N	N	Y	i0_HQ_C_c13272/f2p1/827	827	N	N	N	Y
i0_HQ_N_c115520/f2p6/876	876	N	N	Y	N	i0_HQ_C_c13277/f4p8/984	984	N	N	Y	Y
i0_HQ_N_c115523/f16p11/947	947	N	N	Y	N	i0_HQ_C_c13279/f2p0/638	638	N	N	Y	Y
i0_HQ_N_c115528/f4p1/994	994	N	N	N	Y	i0_HQ_C_c13288/f2p4/971	971	N	N	N	Y
i0_HQ_N_c115534/f10p3/831	831	N	N	N	Y	i0_HQ_C_c13292/f3p0/483	483	Y	Y	Y	Y
i0_HQ_N_c115538/f5p4/566	566	N	N	N	Y	i0_HQ_C_c13296/f2p32/628	628	Y	N	Y	Y
i0_HQ_N_c115540/f14p9/795	795	N	N	Y	N	i0_HQ_C_c1330/f9p2/618	618	Y	N	Y	Y
i0_HQ_N_c115541/f14p1/953	953	N	Y	Y	Y	i0_HQ_C_c13309/f2p0/287	287	N	Y	Y	Y
i0_HQ_N_c115544/f3p50/425	425	Y	Y	Y	Y	i0_HQ_C_c1331/f3p48/460	460	Y	Y	Y	Y
i0_HQ_N_c115549/f3p4/414	414	N	N	Y	Y	i0_HQ_C_c13313/f3p0/275	275	Y	Y	Y	Y
i0_HQ_N_c115550/f2p0/229	229	Y	N	Y	Y	i0_HQ_C_c13326/f2p3/645	645	N	N	N	Y
i0_HQ_N_c115551/f23p6/481	481	N	N	Y	Y	i0_HQ_C_c1334/f3p1/575	575	N	N	Y	Y
i0_HQ_N_c115552/f5p2/756	756	N	N	N	Y	i0_HQ_C_c13348/f2p1/915	915	N	Y	Y	Y
i0_HQ_N_c115553/f2p0/245	245	Y	Y	Y	Y	i0_HQ_C_c13355/f3p5/694	694	N	N	Y	Y
i0_HQ_N_c115560/f37p7/925	925	N	N	N	Y	i0_HQ_C_c13363/f3p0/267	267	Y	Y	Y	Y
i0_HQ_N_c115564/f7p11/872	872	N	N	Y	N	i0_HQ_C_c13368/f2p3/874	874	N	N	N	Y
i0_HQ_N_c115568/f8p18/576	576	N	N	Y	Y	i0_HQ_C_c13373/f3p0/588	588	Y	Y	Y	Y
i0_HQ_N_c115569/f2p0/220	220	Y	Y	Y	Y	i0_HQ_C_c13381/f4p2/484	484	Y	Y	Y	Y
i0_HQ_N_c115570/f2p0/258	258	Y	Y	Y	Y	i0_HQ_C_c13400/f5p2/1009	1009	N	N	N	Y
i0_HQ_N_c115574/f4p2/345	345	Y	Y	Y	Y	i0_HQ_C_c13418/f3p0/584	584	Y	N	Y	Y
i0_HQ_N_c115575/f4p0/246	246	Y	Y	Y	Y	i0_HQ_C_c13419/f2p0/594	594	Y	N	Y	Y
i0_HQ_N_c115576/f7p0/285	285	Y	Y	Y	Y	i0_HQ_C_c1342/f3p6/804	804	N	N	N	Y
i0_HQ_N_c115577/f2p0/217	217	Y	N	Y	Y	i0_HQ_C_c13422/f2p0/859	859	N	N	Y	Y
i0_HQ_N_c115578/f2p0/213	213	Y	Y	Y	Y	i0_HQ_C_c13424/f2p7/970	970	N	N	Y	Y
i0_HQ_N_c115580/f5p58/415	415	Y	N	Y	Y	i0_HQ_C_c13428/f2p0/307	307	Y	Y	Y	Y
i0_HQ_N_c115581/f2p0/239	239	Y	Y	Y	Y	i0_HQ_C_c13438/f2p1/815	815	N	N	Y	Y
i0_HQ_N_c115582/f2p0/250	250	Y	Y	Y	Y	i0_HQ_C_c13440/f5p11/757	757	N	Y	Y	Y
i0_HQ_N_c115583/f3p0/278	278	Y	Y	Y	Y	i0_HQ_C_c13448/f5p17/384	384	Y	Y	Y	Y
i0_HQ_N_c115584/f2p2/420	420	Y	N	Y	Y	i0_HQ_C_c13455/f2p4/549	549	Y	N	Y	Y
i0_HQ_N_c115589/f2p0/238	238	Y	Y	Y	Y	i0_HQ_C_c13456/f3p1/676	676	N	N	Y	Y
i0_HQ_N_c115592/f52p5/779	779	N	N	Y	Y	i0_HQ_C_c13465/f3p3/388	388	N	N	Y	Y
i0_HQ_N_c115594/f20p15/973	973	N	N	N	Y	i0_HQ_C_c13475/f2p1/642	642	N	N	Y	Y
i0_HQ_N_c115595/f10p1/556	556	N	N	N	Y	i0_HQ_C_c13489/f2p8/537	537	Y	N	Y	Y
i0_HQ_N_c115596/f12p7/662	662	N	N	N	Y	i0_HQ_C_c13500/f2p19/979	979	N	N	N	Y
i0_HQ_N_c115599/f5p21/411	411	Y	N	Y	Y	i0_HQ_C_c13509/f2p24/442	442	N	N	Y	Y
i0_HQ_N_c1156/f15p4/475	475	N	Y	N	Y	i0_HQ_C_c13517/f2p1/433	433	Y	Y	Y	Y
i0_HQ_N_c115602/f15p8/949	949	N	N	N	Y	i0_HQ_C_c13523/f3p5/800	800	N	N	N	Y
i0_HQ_N_c115616/f4p5/508	508	N	N	Y	Y	i0_HQ_C_c13530/f5p237/530	530	Y	N	Y	Y
i0_HQ_N_c115618/f8p11/633	633	N	N	Y	Y	i0_HQ_C_c13532/f2p3/924	924	N	N	Y	N
i0_HQ_N_c115625/f3p0/669	669	N	N	Y	N	i0_HQ_C_c13534/f2p12/946	946	N	N	Y	N
i0_HQ_N_c115627/f2p2/748	748	N	N	N	Y	i0_HQ_C_c13538/f2p18/797	797	Y	N	Y	Y
i0_HQ_N_c115628/f3p0/276	276	Y	Y	Y	Y	i0_HQ_C_c1354/f3p16/397	397	Y	Y	Y	Y
i0_HQ_N_c115637/f3p34/372	372	Y	N	Y	Y	i0_HQ_C_c13545/f2p3/927	927	N	N	N	Y
i0_HQ_N_c115639/f3p5/603	603	Y	N	Y	Y	i0_HQ_C_c13547/f2p1/551	551	N	N	N	Y
i0_HQ_N_c115640/f3p0/583	583	N	Y	N	Y	i0_HQ_C_c13562/f2p2/431	431	Y	Y	Y	Y
i0_HQ_N_c115642/f2p0/234	234	Y	Y	Y	Y	i0_HQ_C_c13565/f2p0/702	702	N	Y	Y	Y
i0_HQ_N_c115644/f2p0/220	220	Y	Y	Y	Y	i0_HQ_C_c13571/f3p2/664	664	N	N	Y	Y
i0_HQ_N_c115646/f2p0/228	228	Y	Y	Y	Y	i0_HQ_C_c13576/f2p0/696	696	N	N	N	Y
i0_HQ_N_c115647/f4p0/851	851	Y	N	Y	Y	i0_HQ_C_c13598/f3p1/537	537	Y	N	Y	Y
i0_HQ_N_c115654/f2p0/246	246	N	Y	Y	Y	i0_HQ_C_c13607/f2p23/617	617	N	N	Y	Y
i0_HQ_N_c115659/f14p4/519	519	N	N	Y	Y	i0_HQ_C_c13616/f9p1/915	915	N	N	Y	Y
i0_HQ_N_c115661/f2p0/215	215	Y	Y	Y	Y	i0_HQ_C_c13623/f2p3/597	597	N	N	N	Y
i0_HQ_N_c115664/f3p1/341	341	Y	Y	Y	Y	i0_HQ_C_c13625/f3p2/684	684	N	Y	Y	N
i0_HQ_N_c115665/f3p13/851	851	N	N	Y	Y	i0_HQ_C_c13628/f2p0/349	349	Y	Y	Y	Y
i0_HQ_N_c115666/f2p3/361	361	N	N	Y	Y	i0_HQ_C_c13630/f2p2/893	893	N	N	Y	Y
i0_HQ_N_c115671/f5p1/480	480	Y	N	Y	Y	i0_HQ_C_c13635/f2p7/321	321	Y	Y	Y	Y
i0_HQ_N_c115673/f2p0/290	290	Y	Y	Y	Y	i0_HQ_C_c13652/f2p7/359	359	Y	N	N	Y
i0_HQ_N_c115678/f3p1/745	745	N	N	N	Y	i0_HQ_C_c13669/f2p4/415	415	Y	N	Y	Y
i0_HQ_N_c115679/f2p0/235	235	Y	Y	Y	Y	i0_HQ_C_c13683/f2p25/947	947	N	N	Y	N
i0_HQ_N_c115680/f5p0/496	496	N	N	Y	Y	i0_HQ_C_c13695/f3p29/818	818	N	N	Y	Y
i0_HQ_N_c115681/f5p3/896	896	N	Y	Y	Y	i0_HQ_C_c13739/f2p10/721	721	N	N	Y	Y
i0_HQ_N_c115685/f4p0/354	354	Y	Y	Y	Y	i0_HQ_C_c1374/f12p3/809	809	N	N	Y	Y
i0_HQ_N_c115694/f4p3/384	384	Y	Y	Y	Y	i0_HQ_C_c13748/f3p3/660	660	N	N	Y	Y
i0_HQ_N_c115696/f2p38/845	845	N	N	N	Y	i0_HQ_C_c13755/f2p0/894	894	N	N	Y	Y
i0_HQ_N_c115702/f5p0/654	654	N	N	N	Y	i0_HQ_C_c13758/f2p1/667	667	N	N	Y	Y
i0_HQ_N_c115703/f3p4/654	654	N	N	N	Y	i0_HQ_C_c13761/f3p7/865	865	Y	N	N	N
i0_HQ_N_c115706/f2p0/240	240	Y	Y	Y	Y	i0_HQ_C_c13767/f3p1/593	593	N	Y	Y	Y
i0_HQ_N_c115707/f6p1/575	575	N	N	N	Y	i0_HQ_C_c13768/f3p6/845	845	N	Y	Y	Y
i0_HQ_N_c115710/f10p67/970	970	N	N	N	Y	i0_HQ_C_c1377/f3p3/524	524	Y	Y	Y	Y
i0_HQ_N_c115711/f2p0/180	180	Y	Y	Y	N	i0_HQ_C_c13783/f2p0/977	977	N	N	N	Y
i0_HQ_N_c115712/f17p6/626	626	N	N	Y	Y	i0_HQ_C_c13785/f2p0/628	628	N	N	N	Y
i0_HQ_N_c115713/f4p12/629	629	Y	N	N	Y	i0_HQ_C_c13786/f3p1/576	576	Y	Y	Y	Y
i0_HQ_N_c115721/f2p3/326	326	N	N	Y	Y	i0_HQ_C_c13802/f3p1/923	923	N	N	N	Y
i0_HQ_N_c115722/f2p0/263	263	Y	Y	Y	Y	i0_HQ_C_c13809/f3p2/676	676	N	Y	Y	Y
i0_HQ_N_c115730/f4p0/259	259	Y	Y	Y	Y	i0_HQ_C_c13815/f8p0/760	760	N	N	Y	Y
i0_HQ_N_c115732/f5p3/833	833	N	N	Y	N	i0_HQ_C_c13820/f4p0/588	588	Y	Y	Y	Y
i0_HQ_N_c115733/f2p0/228	228	Y	Y	Y	Y	i0_HQ_C_c1383/f8p2/1024	1024	N	N	Y	N
i0_HQ_N_c115735/f2p0/213	213	Y	Y	Y	Y	i0_HQ_C_c13830/f2p36/534	534	Y	Y	Y	Y
i0_HQ_N_c115744/f5p3/659	659	N	N	Y	Y	i0_HQ_C_c13835/f3p3/750	750	N	Y	Y	Y
i0_HQ_N_c115748/f14p7/840	840	N	N	Y	N	i0_HQ_C_c13840/f2p5/324	324	N	Y	Y	Y
i0_HQ_N_c115749/f19p668/645	645	N	N	N	Y	i0_HQ_C_c13848/f4p0/599	599	N	N	Y	Y
i0_HQ_N_c115753/f2p0/260	260	Y	Y	Y	Y	i0_HQ_C_c13849/f2p0/435	435	Y	N	Y	Y
i0_HQ_N_c115754/f4p3/330	330	Y	Y	Y	Y	i0_HQ_C_c13874/f2p2/481	481	N	N	Y	Y
i0_HQ_N_c115756/f5p6/659	659	N	N	N	Y	i0_HQ_C_c13876/f2p14/911	911	N	N	N	Y
i0_HQ_N_c115757/f13p0/227	227	Y	Y	Y	Y	i0_HQ_C_c13878/f2p3/818	818	N	N	N	Y
i0_HQ_N_c115758/f2p0/236	236	Y	Y	Y	Y	i0_HQ_C_c13881/f2p0/364	364	Y	Y	Y	Y
i0_HQ_N_c115759/f46p3/509	509	N	N	Y	Y	i0_HQ_C_c13893/f2p0/295	295	Y	N	Y	Y
i0_HQ_N_c115763/f5p9/548	548	N	N	Y	Y	i0_HQ_C_c1390/f5p5/409	409	Y	Y	Y	Y
i0_HQ_N_c115765/f17p6/689	689	N	N	N	Y	i0_HQ_C_c13904/f2p0/361	361	N	Y	Y	Y
i0_HQ_N_c115767/f2p0/262	262	Y	Y	Y	Y	i0_HQ_C_c13911/f3p2/961	961	N	N	Y	Y
i0_HQ_N_c115774/f3p0/279	279	Y	Y	Y	Y	i0_HQ_C_c13922/f3p3/756	756	N	Y	N	Y
i0_HQ_N_c115792/f5p6/440	440	Y	N	Y	Y	i0_HQ_C_c13925/f2p2/584	584	Y	N	Y	Y
i0_HQ_N_c115796/f3p1/305	305	Y	Y	Y	Y	i0_HQ_C_c13932/f2p0/747	747	Y	N	N	Y
i0_HQ_N_c115802/f3p2/310	310	Y	N	Y	Y	i0_HQ_C_c13934/f2p0/434	434	Y	Y	Y	Y
i0_HQ_N_c11581/f2p2/831	831	N	N	Y	Y	i0_HQ_C_c13938/f2p5/328	328	Y	N	Y	Y
i0_HQ_N_c115810/f2p3/347	347	N	N	N	Y	i0_HQ_C_c13940/f2p0/558	558	Y	Y	Y	Y
i0_HQ_N_c115813/f2p0/240	240	Y	Y	Y	Y	i0_HQ_C_c13951/f2p0/304	304	Y	Y	Y	Y
i0_HQ_N_c11582/f2p0/686	686	N	Y	N	Y	i0_HQ_C_c13962/f2p12/761	761	N	N	Y	N
i0_HQ_N_c115820/f6p72/953	953	N	N	N	Y	i0_HQ_C_c13966/f2p2/855	855	N	N	N	Y
i0_HQ_N_c115827/f4p10/403	403	Y	N	N	Y	i0_HQ_C_c13967/f4p3/904	904	Y	N	Y	Y
i0_HQ_N_c115831/f19p12/851	851	N	N	N	Y	i0_HQ_C_c13971/f4p0/904	904	N	N	N	Y
i0_HQ_N_c115832/f2p0/208	208	Y	Y	Y	Y	i0_HQ_C_c13983/f5p3/749	749	N	N	Y	Y
i0_HQ_N_c115836/f3p3/645	645	N	N	Y	Y	i0_HQ_C_c13990/f2p2/918	918	N	N	Y	N
i0_HQ_N_c115843/f6p48/888	888	N	N	N	Y	i0_HQ_C_c1401/f11p3/595	595	Y	N	Y	Y
i0_HQ_N_c115845/f2p0/239	239	Y	Y	Y	Y	i0_HQ_C_c14013/f5p2/495	495	Y	N	Y	Y
i0_HQ_N_c115847/f2p1/468	468	Y	Y	Y	Y	i0_HQ_C_c14015/f2p0/876	876	N	Y	N	Y
i0_HQ_N_c115848/f2p0/222	222	Y	Y	Y	Y	i0_HQ_C_c14020/f2p0/283	283	Y	Y	Y	Y
i0_HQ_N_c115852/f5p13/665	665	N	N	Y	Y	i0_HQ_C_c14027/f3p2/790	790	N	N	Y	Y
i0_HQ_N_c115854/f2p0/226	226	Y	Y	Y	Y	i0_HQ_C_c14032/f2p3/623	623	N	N	Y	Y
i0_HQ_N_c115856/f2p4/724	724	N	N	Y	Y	i0_HQ_C_c14038/f2p2/697	697	N	N	Y	Y
i0_HQ_N_c115858/f2p0/219	219	Y	Y	Y	Y	i0_HQ_C_c1404/f5p1/347	347	Y	N	Y	Y
i0_HQ_N_c11586/f2p0/802	802	N	N	N	Y	i0_HQ_C_c14041/f2p8/740	740	N	N	Y	Y
i0_HQ_N_c115868/f2p0/241	241	Y	Y	Y	Y	i0_HQ_C_c14047/f2p2/548	548	N	N	N	Y
i0_HQ_N_c115869/f2p6/562	562	Y	N	Y	Y	i0_HQ_C_c14048/f3p2/792	792	N	N	Y	Y
i0_HQ_N_c115870/f2p0/234	234	Y	Y	Y	Y	i0_HQ_C_c14071/f2p2/583	583	N	N	Y	Y
i0_HQ_N_c115875/f2p0/256	256	Y	Y	Y	Y	i0_HQ_C_c14073/f2p0/708	708	N	Y	Y	Y
i0_HQ_N_c115877/f2p0/240	240	Y	Y	Y	Y	i0_HQ_C_c14077/f4p11/607	607	N	N	Y	Y
i0_HQ_N_c115882/f5p7/398	398	Y	Y	Y	Y	i0_HQ_C_c14079/f2p0/291	291	Y	Y	Y	Y
i0_HQ_N_c115888/f3p6/303	303	Y	Y	Y	Y	i0_HQ_C_c14090/f2p0/328	328	Y	Y	Y	Y
i0_HQ_N_c115892/f5p0/766	766	N	N	N	Y	i0_HQ_C_c14094/f4p3/991	991	N	N	N	Y
i0_HQ_N_c115894/f2p3/317	317	Y	Y	Y	Y	i0_HQ_C_c1410/f6p0/449	449	N	Y	Y	Y
i0_HQ_N_c115895/f5p2/672	672	N	N	N	Y	i0_HQ_C_c14101/f2p6/655	655	N	N	Y	Y
i0_HQ_N_c115904/f5p2/665	665	N	N	N	Y	i0_HQ_C_c14102/f2p1/374	374	Y	N	Y	Y
i0_HQ_N_c115905/f7p9/399	399	Y	N	Y	Y	i0_HQ_C_c14106/f3p1/1004	1004	N	Y	Y	Y
i0_HQ_N_c115907/f53p7/669	669	N	N	N	Y	i0_HQ_C_c14111/f2p0/976	976	N	N	Y	N
i0_HQ_N_c115911/f8p0/649	649	N	N	Y	Y	i0_HQ_C_c14113/f4p0/642	642	N	N	Y	Y
i0_HQ_N_c115912/f3p0/264	264	Y	Y	Y	Y	i0_HQ_C_c14129/f3p2/760	760	N	N	N	Y
i0_HQ_N_c115913/f3p0/291	291	Y	Y	Y	Y	i0_HQ_C_c14132/f4p0/806	806	N	Y	Y	Y
i0_HQ_N_c115915/f3p0/249	249	Y	Y	Y	Y	i0_HQ_C_c14137/f4p5/900	900	N	N	N	Y
i0_HQ_N_c115921/f11p0/510	510	Y	N	Y	Y	i0_HQ_C_c14155/f2p0/324	324	Y	Y	Y	Y
i0_HQ_N_c115926/f13p3/847	847	N	N	N	Y	i0_HQ_C_c14156/f2p0/541	541	N	Y	Y	Y
i0_HQ_N_c11594/f2p2/531	531	N	N	Y	Y	i0_HQ_C_c14157/f3p2/730	730	Y	N	Y	Y
i0_HQ_N_c115941/f18p2/594	594	N	Y	Y	Y	i0_HQ_C_c14160/f3p3/516	516	N	N	Y	Y
i0_HQ_N_c115942/f31p11/633	633	Y	N	Y	Y	i0_HQ_C_c1417/f3p1/418	418	Y	N	Y	Y
i0_HQ_N_c115946/f24p5/861	861	N	N	N	Y	i0_HQ_C_c14184/f2p0/354	354	N	N	Y	Y
i0_HQ_N_c115947/f8p7/790	790	N	N	N	Y	i0_HQ_C_c14191/f11p4/547	547	N	N	Y	Y
i0_HQ_N_c11595/f4p0/765	765	N	N	N	Y	i0_HQ_C_c14201/f2p4/479	479	N	N	Y	Y
i0_HQ_N_c115950/f5p3/999	999	N	N	Y	N	i0_HQ_C_c14210/f2p0/407	407	Y	Y	Y	Y
i0_HQ_N_c115952/f9p0/777	777	N	N	N	Y	i0_HQ_C_c14212/f5p1/644	644	Y	N	Y	Y
i0_HQ_N_c115954/f2p50/978	978	N	N	N	Y	i0_HQ_C_c1422/f3p0/716	716	N	N	N	Y
i0_HQ_N_c115956/f11p0/275	275	Y	Y	Y	Y	i0_HQ_C_c14229/f2p3/374	374	Y	N	Y	Y
i0_HQ_N_c115958/f5p1/304	304	Y	Y	Y	Y	i0_HQ_C_c14231/f2p0/574	574	N	N	Y	Y
i0_HQ_N_c115960/f8p2/538	538	Y	N	Y	Y	i0_HQ_C_c14237/f3p1/791	791	N	N	Y	Y
i0_HQ_N_c115964/f12p3/900	900	N	N	N	Y	i0_HQ_C_c1426/f4p1/746	746	N	N	Y	Y
i0_HQ_N_c115969/f5p0/259	259	Y	Y	Y	Y	i0_HQ_C_c14265/f3p2/967	967	N	N	N	Y
i0_HQ_N_c115970/f54p17/763	763	N	N	Y	Y	i0_HQ_C_c14284/f4p0/652	652	N	Y	Y	Y
i0_HQ_N_c115971/f31p4/894	894	N	N	Y	N	i0_HQ_C_c1429/f3p4/541	541	N	N	Y	Y
i0_HQ_N_c115973/f2p0/458	458	Y	Y	Y	Y	i0_HQ_C_c1432/f6p3/585	585	N	N	N	Y
i0_HQ_N_c115976/f4p0/270	270	Y	Y	Y	Y	i0_HQ_C_c14323/f2p2/791	791	N	N	N	Y
i0_HQ_N_c115977/f2p0/258	258	Y	Y	Y	Y	i0_HQ_C_c14325/f2p104/465	465	N	N	Y	Y
i0_HQ_N_c115979/f3p3/417	417	N	N	Y	Y	i0_HQ_C_c14354/f3p1/475	475	N	N	Y	Y
i0_HQ_N_c115980/f4p11/311	311	N	N	Y	Y	i0_HQ_C_c14362/f4p30/968	968	N	N	N	Y
i0_HQ_N_c115983/f6p0/288	288	Y	Y	Y	Y	i0_HQ_C_c14374/f3p11/640	640	Y	N	Y	Y
i0_HQ_N_c115987/f16p6/536	536	N	N	Y	Y	i0_HQ_C_c14375/f2p5/548	548	Y	N	N	Y
i0_HQ_N_c115989/f49p12/578	578	N	N	N	Y	i0_HQ_C_c14395/f3p1/782	782	N	N	Y	Y
i0_HQ_N_c115995/f3p2/335	335	Y	Y	Y	Y	i0_HQ_C_c14401/f3p3/304	304	Y	Y	Y	Y
i0_HQ_N_c116013/f7p1/561	561	N	N	N	Y	i0_HQ_C_c14411/f4p1/317	317	Y	Y	Y	Y
i0_HQ_N_c116018/f2p1/577	577	N	N	N	Y	i0_HQ_C_c14412/f3p0/432	432	N	Y	Y	Y
i0_HQ_N_c11602/f3p0/507	507	Y	N	Y	Y	i0_HQ_C_c14416/f2p0/413	413	Y	Y	Y	Y
i0_HQ_N_c116031/f8p3/536	536	N	Y	Y	Y	i0_HQ_C_c14420/f2p0/660	660	N	Y	Y	Y
i0_HQ_N_c116037/f3p5/669	669	N	N	Y	Y	i0_HQ_C_c14421/f4p0/580	580	N	N	N	Y
i0_HQ_N_c116041/f8p6/636	636	N	N	N	Y	i0_HQ_C_c14422/f2p5/484	484	N	N	N	Y
i0_HQ_N_c116050/f2p0/274	274	Y	Y	Y	Y	i0_HQ_C_c14427/f5p6/920	920	N	N	N	Y
i0_HQ_N_c116051/f2p0/227	227	Y	Y	Y	Y	i0_HQ_C_c14429/f2p1/312	312	Y	Y	Y	Y
i0_HQ_N_c116052/f4p9/582	582	Y	N	Y	Y	i0_HQ_C_c14432/f3p1/973	973	N	N	N	Y
i0_HQ_N_c116065/f2p0/226	226	Y	Y	Y	Y	i0_HQ_C_c14433/f2p17/352	352	Y	N	Y	Y
i0_HQ_N_c116066/f4p5/434	434	Y	N	Y	Y	i0_HQ_C_c1444/f10p1/813	813	N	N	Y	Y
i0_HQ_N_c116071/f2p0/420	420	Y	Y	Y	Y	i0_HQ_C_c14440/f2p4/518	518	N	N	N	Y
i0_HQ_N_c116078/f4p136/674	674	N	N	Y	Y	i0_HQ_C_c1445/f3p1/635	635	N	N	Y	Y
i0_HQ_N_c116080/f2p0/297	297	Y	Y	Y	Y	i0_HQ_C_c1446/f3p1/311	311	Y	Y	Y	Y
i0_HQ_N_c116087/f76p13/989	989	N	N	N	Y	i0_HQ_C_c14476/f2p0/256	256	Y	Y	Y	Y
i0_HQ_N_c116091/f2p0/238	238	Y	Y	Y	Y	i0_HQ_C_c1448/f2p1/830	830	Y	Y	Y	Y
i0_HQ_N_c116094/f2p0/215	215	Y	Y	Y	Y	i0_HQ_C_c14482/f2p1/310	310	Y	Y	Y	Y
i0_HQ_N_c116098/f2p0/218	218	Y	Y	Y	Y	i0_HQ_C_c1449/f5p0/264	264	Y	Y	Y	Y
i0_HQ_N_c116101/f19p10/446	446	N	N	Y	Y	i0_HQ_C_c14501/f3p1/383	383	Y	Y	Y	Y
i0_HQ_N_c116103/f2p0/363	363	Y	Y	Y	Y	i0_HQ_C_c1451/f5p4/346	346	Y	Y	Y	Y
i0_HQ_N_c116106/f5p5/458	458	N	Y	Y	Y	i0_HQ_C_c1452/f11p6/993	993	N	N	N	Y
i0_HQ_N_c116108/f2p0/224	224	Y	Y	Y	Y	i0_HQ_C_c14528/f2p239/398	398	Y	N	N	Y
i0_HQ_N_c116109/f4p0/849	849	N	N	Y	Y	i0_HQ_C_c14529/f3p0/415	415	Y	Y	Y	Y
i0_HQ_N_c11611/f2p0/443	443	Y	Y	Y	Y	i0_HQ_C_c1454/f2p6/373	373	Y	Y	Y	Y
i0_HQ_N_c116111/f57p11/675	675	N	N	N	Y	i0_HQ_C_c14547/f2p0/265	265	Y	Y	Y	Y
i0_HQ_N_c116114/f3p1/431	431	N	N	Y	Y	i0_HQ_C_c1456/f3p6/553	553	N	N	Y	Y
i0_HQ_N_c116116/f2p0/212	212	Y	Y	Y	Y	i0_HQ_C_c1459/f2p8/782	782	Y	N	N	Y
i0_HQ_N_c116135/f4p0/597	597	N	Y	Y	Y	i0_HQ_C_c14602/f2p48/378	378	Y	Y	Y	Y
i0_HQ_N_c116139/f5p4/641	641	N	N	N	Y	i0_HQ_C_c1461/f2p3/327	327	Y	Y	Y	Y
i0_HQ_N_c116142/f5p0/411	411	Y	Y	Y	Y	i0_HQ_C_c14617/f2p0/637	637	N	Y	Y	Y
i0_HQ_N_c116143/f5p0/258	258	Y	Y	Y	Y	i0_HQ_C_c14619/f2p0/618	618	Y	N	Y	Y
i0_HQ_N_c116144/f5p3/351	351	Y	Y	Y	Y	i0_HQ_C_c14627/f2p7/571	571	N	N	Y	Y
i0_HQ_N_c116145/f6p0/248	248	Y	Y	Y	Y	i0_HQ_C_c1463/f3p1/585	585	N	N	N	Y
i0_HQ_N_c116156/f11p9/667	667	N	N	Y	Y	i0_HQ_C_c14647/f4p1/409	409	N	N	Y	Y
i0_HQ_N_c116160/f3p2/387	387	Y	Y	Y	Y	i0_HQ_C_c1465/f2p0/430	430	N	N	Y	Y
i0_HQ_N_c116163/f24p8/847	847	N	N	N	Y	i0_HQ_C_c14651/f2p3/1011	1011	N	N	Y	N
i0_HQ_N_c116165/f3p0/213	213	Y	Y	Y	Y	i0_HQ_C_c14652/f2p0/295	295	Y	Y	Y	Y
i0_HQ_N_c116173/f35p6/949	949	N	N	N	Y	i0_HQ_C_c14654/f2p24/929	929	Y	N	N	Y
i0_HQ_N_c116183/f5p8/487	487	Y	N	Y	Y	i0_HQ_C_c14656/f2p2/463	463	N	N	Y	Y
i0_HQ_N_c116194/f5p0/250	250	Y	Y	Y	Y	i0_HQ_C_c1466/f3p4/538	538	N	N	Y	Y
i0_HQ_N_c116202/f4p0/278	278	Y	Y	Y	Y	i0_HQ_C_c14667/f4p2/862	862	N	N	N	Y
i0_HQ_N_c116203/f2p0/247	247	Y	Y	Y	Y	i0_HQ_C_c14683/f3p2/840	840	N	N	N	Y
i0_HQ_N_c116204/f2p0/232	232	Y	Y	Y	Y	i0_HQ_C_c14688/f2p32/327	327	Y	Y	Y	Y
i0_HQ_N_c116208/f8p18/508	508	Y	N	Y	Y	i0_HQ_C_c1470/f2p4/784	784	N	N	N	Y
i0_HQ_N_c116212/f40p7/450	450	N	N	Y	Y	i0_HQ_C_c14702/f2p0/277	277	Y	N	Y	Y
i0_HQ_N_c116213/f25p3/534	534	N	N	N	Y	i0_HQ_C_c14709/f2p0/350	350	Y	N	Y	Y
i0_HQ_N_c116215/f20p4/527	527	Y	N	Y	Y	i0_HQ_C_c14711/f10p7/928	928	N	N	Y	N
i0_HQ_N_c116217/f26p5/624	624	N	N	Y	Y	i0_HQ_C_c14718/f3p4/954	954	N	N	N	Y
i0_HQ_N_c116218/f24p4/646	646	N	N	Y	Y	i0_HQ_C_c1473/f4p2/560	560	Y	N	Y	Y
i0_HQ_N_c116219/f23p5/681	681	N	N	N	Y	i0_HQ_C_c14738/f2p3/625	625	N	N	N	Y
i0_HQ_N_c116256/f4p6/426	426	Y	Y	Y	Y	i0_HQ_C_c14739/f2p3/845	845	Y	Y	Y	Y
i0_HQ_N_c116265/f4p3/323	323	N	N	Y	Y	i0_HQ_C_c1474/f5p2/874	874	N	N	N	Y
i0_HQ_N_c116275/f4p2/673	673	N	Y	Y	Y	i0_HQ_C_c14740/f3p2/288	288	Y	Y	Y	Y
i0_HQ_N_c116286/f22p7/790	790	N	N	N	Y	i0_HQ_C_c14748/f7p2/585	585	N	N	Y	Y
i0_HQ_N_c116292/f2p3/381	381	N	N	Y	Y	i0_HQ_C_c1475/f2p3/829	829	N	N	N	Y
i0_HQ_N_c116298/f12p0/263	263	Y	Y	Y	Y	i0_HQ_C_c14755/f2p1/307	307	Y	Y	Y	Y
i0_HQ_N_c1163/f4p2/914	914	N	N	Y	Y	i0_HQ_C_c1476/f2p0/715	715	Y	Y	Y	Y
i0_HQ_N_c116303/f12p1/280	280	Y	Y	Y	Y	i0_HQ_C_c14767/f2p0/284	284	Y	Y	Y	Y
i0_HQ_N_c116305/f8p3/894	894	N	Y	Y	N	i0_HQ_C_c14771/f2p0/316	316	Y	Y	Y	Y
i0_HQ_N_c11631/f3p0/744	744	N	Y	Y	Y	i0_HQ_C_c14795/f2p2/593	593	N	N	N	Y
i0_HQ_N_c116318/f4p38/946	946	N	N	N	Y	i0_HQ_C_c14797/f2p4/663	663	N	N	Y	Y
i0_HQ_N_c116323/f3p3/571	571	N	N	Y	Y	i0_HQ_C_c1480/f8p0/315	315	Y	Y	Y	Y
i0_HQ_N_c116330/f3p0/266	266	Y	Y	Y	Y	i0_HQ_C_c14803/f2p4/812	812	N	N	N	Y
i0_HQ_N_c116331/f6p6/305	305	Y	Y	Y	Y	i0_HQ_C_c1481/f3p22/679	679	N	Y	Y	Y
i0_HQ_N_c116346/f2p2/363	363	Y	Y	Y	Y	i0_HQ_C_c14817/f2p1/662	662	Y	N	Y	Y
i0_HQ_N_c116358/f27p8/633	633	N	N	N	Y	i0_HQ_C_c14818/f4p0/282	282	Y	Y	Y	Y
i0_HQ_N_c116359/f4p0/258	258	Y	Y	Y	Y	i0_HQ_C_c14821/f2p0/595	595	Y	N	Y	Y
i0_HQ_N_c116368/f43p6/738	738	N	Y	Y	N	i0_HQ_C_c14825/f3p0/447	447	Y	N	Y	Y
i0_HQ_N_c116374/f2p2/713	713	N	Y	Y	Y	i0_HQ_C_c14836/f2p0/497	497	N	N	N	Y
i0_HQ_N_c116376/f5p3/336	336	Y	Y	Y	Y	i0_HQ_C_c14847/f5p4/957	957	N	N	Y	Y
i0_HQ_N_c116395/f3p3/344	344	Y	Y	Y	Y	i0_HQ_C_c14849/f2p0/308	308	Y	Y	Y	Y
i0_HQ_N_c1164/f5p2/865	865	N	Y	Y	Y	i0_HQ_C_c14854/f3p0/249	249	Y	Y	Y	Y
i0_HQ_N_c116409/f42p6/468	468	N	N	Y	Y	i0_HQ_C_c14859/f2p0/414	414	N	N	Y	Y
i0_HQ_N_c116419/f5p11/492	492	N	N	N	Y	i0_HQ_C_c14861/f3p0/709	709	N	N	N	Y
i0_HQ_N_c116429/f4p0/265	265	Y	Y	Y	Y	i0_HQ_C_c1487/f4p2/737	737	N	N	N	Y
i0_HQ_N_c116435/f38p5/937	937	N	N	Y	Y	i0_HQ_C_c14878/f2p1/279	279	Y	Y	Y	Y
i0_HQ_N_c116436/f20p16/805	805	N	N	Y	N	i0_HQ_C_c14879/f3p2/634	634	Y	N	N	Y
i0_HQ_N_c116439/f29p7/643	643	N	N	N	Y	i0_HQ_C_c1488/f2p2/781	781	Y	N	N	Y
i0_HQ_N_c116440/f23p8/869	869	N	N	N	Y	i0_HQ_C_c1489/f7p2/472	472	Y	Y	Y	Y
i0_HQ_N_c116446/f25p4/768	768	N	N	Y	Y	i0_HQ_C_c1490/f9p2/596	596	N	N	N	Y
i0_HQ_N_c116448/f7p5/778	778	Y	N	N	Y	i0_HQ_C_c14902/f3p6/416	416	Y	Y	Y	Y
i0_HQ_N_c11645/f4p1/647	647	N	N	N	Y	i0_HQ_C_c14908/f2p1/876	876	N	N	N	Y
i0_HQ_N_c116451/f9p7/635	635	N	Y	Y	Y	i0_HQ_C_c14914/f2p0/266	266	Y	Y	Y	Y
i0_HQ_N_c116454/f12p25/660	660	N	N	N	Y	i0_HQ_C_c1492/f2p2/363	363	Y	Y	Y	Y
i0_HQ_N_c116467/f8p0/265	265	Y	Y	Y	Y	i0_HQ_C_c1493/f5p7/915	915	N	N	Y	Y
i0_HQ_N_c116474/f10p6/748	748	N	Y	Y	Y	i0_HQ_C_c14934/f2p8/435	435	N	N	Y	Y
i0_HQ_N_c116476/f10p0/246	246	Y	Y	Y	Y	i0_HQ_C_c14938/f3p11/932	932	Y	N	Y	Y
i0_HQ_N_c116478/f9p0/260	260	Y	Y	Y	Y	i0_HQ_C_c1494/f4p14/869	869	N	N	Y	Y
i0_HQ_N_c116480/f12p3/588	588	N	N	Y	Y	i0_HQ_C_c14943/f2p2/488	488	N	Y	Y	Y
i0_HQ_N_c116481/f14p1/456	456	N	N	Y	Y	i0_HQ_C_c14948/f3p5/896	896	N	N	N	Y
i0_HQ_N_c116492/f2p8/322	322	Y	Y	Y	Y	i0_HQ_C_c1495/f7p0/728	728	N	N	Y	Y
i0_HQ_N_c116497/f4p2/361	361	N	N	Y	Y	i0_HQ_C_c1496/f3p2/634	634	N	Y	Y	Y
i0_HQ_N_c1165/f24p6/564	564	N	N	Y	Y	i0_HQ_C_c1497/f2p91/805	805	Y	N	Y	Y
i0_HQ_N_c116500/f5p9/318	318	Y	Y	Y	Y	i0_HQ_C_c1498/f2p1/418	418	N	N	Y	Y
i0_HQ_N_c116501/f20p17/370	370	Y	Y	Y	Y	i0_HQ_C_c1499/f2p3/416	416	Y	Y	Y	Y
i0_HQ_N_c116507/f43p6/756	756	Y	N	N	Y	i0_HQ_C_c14997/f3p0/954	954	N	Y	Y	Y
i0_HQ_N_c116512/f28p7/626	626	N	N	N	Y	i0_HQ_C_c14999/f2p8/571	571	Y	Y	Y	Y
i0_HQ_N_c116514/f12p4/691	691	N	N	N	Y	i0_HQ_C_c1500/f2p1/409	409	Y	Y	Y	Y
i0_HQ_N_c116516/f14p3/762	762	N	N	N	Y	i0_HQ_C_c15007/f2p0/548	548	Y	Y	Y	Y
i0_HQ_N_c116517/f11p5/639	639	N	N	N	Y	i0_HQ_C_c15009/f2p1/783	783	N	N	N	Y
i0_HQ_N_c116524/f3p11/659	659	N	N	N	Y	i0_HQ_C_c1501/f11p5/794	794	N	N	Y	Y
i0_HQ_N_c116525/f11p6/790	790	N	N	Y	Y	i0_HQ_C_c15015/f2p1/835	835	N	N	N	Y
i0_HQ_N_c116530/f55p12/929	929	N	N	N	Y	i0_HQ_C_c15016/f6p13/473	473	Y	Y	Y	Y
i0_HQ_N_c116535/f6p0/291	291	Y	Y	Y	Y	i0_HQ_C_c1502/f3p0/632	632	N	N	N	Y
i0_HQ_N_c116536/f8p10/568	568	N	N	N	Y	i0_HQ_C_c15021/f2p3/881	881	N	N	N	Y
i0_HQ_N_c116537/f14p0/272	272	Y	N	Y	Y	i0_HQ_C_c1503/f2p0/276	276	Y	N	Y	Y
i0_HQ_N_c116546/f51p16/853	853	N	N	N	Y	i0_HQ_C_c15030/f2p3/506	506	Y	N	Y	Y
i0_HQ_N_c116557/f5p9/646	646	N	N	Y	Y	i0_HQ_C_c15037/f2p4/397	397	Y	Y	Y	Y
i0_HQ_N_c116566/f43p5/466	466	N	N	Y	Y	i0_HQ_C_c15042/f2p1/725	725	N	N	Y	Y
i0_HQ_N_c116572/f3p140/1007	1007	Y	N	N	Y	i0_HQ_C_c15044/f2p2/927	927	N	N	N	Y
i0_HQ_N_c116574/f4p4/528	528	N	N	Y	Y	i0_HQ_C_c15047/f2p0/948	948	N	Y	Y	Y
i0_HQ_N_c116584/f5p28/347	347	Y	Y	Y	Y	i0_HQ_C_c1506/f2p4/467	467	N	N	Y	Y
i0_HQ_N_c116585/f2p8/509	509	N	Y	Y	Y	i0_HQ_C_c1507/f2p0/432	432	Y	Y	Y	Y
i0_HQ_N_c11659/f2p1/603	603	Y	N	Y	Y	i0_HQ_C_c15077/f2p0/475	475	N	Y	Y	Y
i0_HQ_N_c116591/f3p4/356	356	Y	N	Y	Y	i0_HQ_C_c1508/f2p0/892	892	N	N	N	Y
i0_HQ_N_c116592/f3p0/322	322	Y	Y	Y	Y	i0_HQ_C_c15085/f3p8/924	924	N	Y	Y	Y
i0_HQ_N_c116599/f6p1/328	328	Y	Y	Y	Y	i0_HQ_C_c1511/f5p4/550	550	N	N	Y	Y
i0_HQ_N_c1166/f4p0/516	516	N	N	N	Y	i0_HQ_C_c15114/f2p2/654	654	N	N	Y	Y
i0_HQ_N_c116601/f10p6/716	716	N	Y	Y	Y	i0_HQ_C_c15118/f2p0/771	771	N	N	N	Y
i0_HQ_N_c116602/f6p3/400	400	N	N	Y	Y	i0_HQ_C_c1512/f5p12/505	505	Y	Y	Y	Y
i0_HQ_N_c116605/f2p1/745	745	N	N	N	Y	i0_HQ_C_c1513/f2p0/385	385	Y	Y	Y	Y
i0_HQ_N_c116609/f22p2/651	651	N	N	N	Y	i0_HQ_C_c1515/f2p1/806	806	N	N	Y	Y
i0_HQ_N_c116616/f25p17/915	915	N	N	Y	N	i0_HQ_C_c15156/f2p1/661	661	N	Y	Y	Y
i0_HQ_N_c116617/f34p5/518	518	N	N	N	Y	i0_HQ_C_c15167/f6p1/673	673	N	N	N	Y
i0_HQ_N_c11662/f2p2/572	572	Y	N	Y	Y	i0_HQ_C_c1517/f3p44/659	659	Y	N	Y	Y
i0_HQ_N_c116637/f8p3/873	873	N	N	N	Y	i0_HQ_C_c15171/f2p0/315	315	Y	Y	Y	Y
i0_HQ_N_c116640/f22p8/807	807	N	N	N	Y	i0_HQ_C_c15172/f2p4/912	912	N	N	N	Y
i0_HQ_N_c11665/f2p0/481	481	Y	Y	Y	Y	i0_HQ_C_c15192/f2p1/524	524	N	N	Y	Y
i0_HQ_N_c116651/f23p107/714	714	N	N	Y	N	i0_HQ_C_c15193/f2p0/963	963	N	Y	Y	Y
i0_HQ_N_c116662/f2p0/339	339	Y	Y	Y	Y	i0_HQ_C_c15195/f2p6/342	342	Y	N	Y	Y
i0_HQ_N_c116670/f21p7/547	547	N	N	Y	Y	i0_HQ_C_c15196/f4p4/809	809	N	N	N	Y
i0_HQ_N_c116695/f9p7/731	731	N	N	Y	Y	i0_HQ_C_c15197/f2p1/815	815	N	Y	Y	Y
i0_HQ_N_c116696/f4p8/673	673	N	N	Y	Y	i0_HQ_C_c15202/f2p0/851	851	N	Y	Y	Y
i0_HQ_N_c116700/f6p8/666	666	N	N	Y	Y	i0_HQ_C_c15208/f2p0/377	377	N	N	Y	Y
i0_HQ_N_c116711/f14p4/338	338	Y	N	Y	Y	i0_HQ_C_c1521/f3p7/544	544	N	N	N	Y
i0_HQ_N_c116727/f5p4/832	832	N	N	Y	N	i0_HQ_C_c15211/f3p0/497	497	N	Y	Y	Y
i0_HQ_N_c116731/f3p0/318	318	Y	Y	Y	Y	i0_HQ_C_c15216/f2p1/870	870	N	Y	Y	Y
i0_HQ_N_c116737/f2p3/442	442	N	N	N	Y	i0_HQ_C_c1522/f3p2/624	624	N	N	N	Y
i0_HQ_N_c116760/f7p3/488	488	Y	Y	Y	Y	i0_HQ_C_c15223/f7p3/614	614	N	Y	Y	Y
i0_HQ_N_c11678/f2p8/720	720	N	N	N	Y	i0_HQ_C_c1523/f3p2/698	698	N	N	N	Y
i0_HQ_N_c116780/f2p41/658	658	N	N	N	Y	i0_HQ_C_c15236/f3p0/835	835	N	Y	Y	Y
i0_HQ_N_c116789/f4p5/686	686	N	N	N	Y	i0_HQ_C_c15240/f2p2/648	648	N	Y	Y	Y
i0_HQ_N_c11679/f2p4/456	456	N	N	Y	Y	i0_HQ_C_c15245/f3p6/340	340	Y	Y	Y	Y
i0_HQ_N_c11680/f6p0/884	884	N	N	N	Y	i0_HQ_C_c15248/f4p2/721	721	N	N	N	Y
i0_HQ_N_c116808/f5p8/803	803	N	N	N	Y	i0_HQ_C_c1525/f2p4/752	752	N	N	N	Y
i0_HQ_N_c116810/f2p5/320	320	Y	Y	Y	Y	i0_HQ_C_c1526/f13p4/689	689	N	Y	Y	Y
i0_HQ_N_c116813/f2p0/253	253	Y	Y	Y	Y	i0_HQ_C_c15268/f2p7/807	807	N	N	N	Y
i0_HQ_N_c11682/f3p28/755	755	N	N	N	Y	i0_HQ_C_c1527/f3p0/833	833	N	N	Y	Y
i0_HQ_N_c116846/f2p0/227	227	Y	Y	Y	Y	i0_HQ_C_c15271/f5p1/639	639	N	N	N	Y
i0_HQ_N_c116849/f2p0/237	237	Y	Y	Y	Y	i0_HQ_C_c15272/f2p1/458	458	N	N	Y	Y
i0_HQ_N_c11685/f4p0/570	570	N	Y	Y	Y	i0_HQ_C_c15281/f2p4/523	523	Y	Y	Y	Y
i0_HQ_N_c116858/f2p0/238	238	Y	Y	Y	Y	i0_HQ_C_c15282/f4p4/327	327	Y	Y	Y	Y
i0_HQ_N_c116859/f2p0/218	218	Y	Y	Y	Y	i0_HQ_C_c15291/f2p12/684	684	N	N	Y	Y
i0_HQ_N_c116865/f2p0/231	231	Y	Y	Y	Y	i0_HQ_C_c15293/f3p9/851	851	N	N	Y	Y
i0_HQ_N_c116867/f2p0/225	225	Y	Y	Y	Y	i0_HQ_C_c15297/f2p5/881	881	N	N	Y	Y
i0_HQ_N_c116878/f20p4/449	449	N	N	Y	Y	i0_HQ_C_c1530/f3p4/552	552	N	N	N	Y
i0_HQ_N_c116886/f2p0/219	219	Y	Y	Y	Y	i0_HQ_C_c15303/f2p3/585	585	N	N	N	Y
i0_HQ_N_c116887/f2p0/221	221	Y	Y	Y	Y	i0_HQ_C_c1532/f2p1/340	340	Y	Y	Y	Y
i0_HQ_N_c116902/f2p0/217	217	Y	Y	Y	Y	i0_HQ_C_c15337/f5p2/848	848	N	N	Y	Y
i0_HQ_N_c116903/f7p3/477	477	N	N	Y	Y	i0_HQ_C_c1534/f3p0/730	730	N	Y	Y	Y
i0_HQ_N_c116907/f4p0/270	270	Y	Y	Y	Y	i0_HQ_C_c15344/f2p31/404	404	Y	N	Y	Y
i0_HQ_N_c116908/f8p5/455	455	Y	N	Y	Y	i0_HQ_C_c1535/f8p3/716	716	N	N	N	Y
i0_HQ_N_c116912/f2p0/234	234	Y	Y	Y	Y	i0_HQ_C_c1536/f9p3/682	682	N	N	N	Y
i0_HQ_N_c116916/f3p5/552	552	N	N	N	Y	i0_HQ_C_c15360/f4p3/756	756	N	N	N	Y
i0_HQ_N_c116917/f2p0/408	408	Y	N	Y	Y	i0_HQ_C_c15364/f2p2/375	375	Y	Y	Y	Y
i0_HQ_N_c116920/f4p7/611	611	N	N	N	Y	i0_HQ_C_c1537/f3p1/388	388	Y	Y	Y	Y
i0_HQ_N_c11694/f2p5/983	983	N	N	Y	Y	i0_HQ_C_c15372/f4p3/624	624	N	N	N	Y
i0_HQ_N_c116948/f6p0/211	211	Y	Y	Y	Y	i0_HQ_C_c15382/f2p0/547	547	Y	N	Y	Y
i0_HQ_N_c116974/f4p0/236	236	Y	Y	Y	Y	i0_HQ_C_c1539/f2p0/298	298	Y	Y	Y	Y
i0_HQ_N_c116975/f3p0/218	218	Y	Y	Y	Y	i0_HQ_C_c1540/f7p4/886	886	N	N	N	Y
i0_HQ_N_c11698/f3p0/544	544	Y	Y	Y	Y	i0_HQ_C_c15408/f2p0/534	534	N	N	Y	Y
i0_HQ_N_c116997/f3p0/243	243	Y	Y	Y	Y	i0_HQ_C_c1541/f3p3/655	655	N	N	Y	Y
i0_HQ_N_c11702/f3p2/546	546	N	N	Y	Y	i0_HQ_C_c15418/f4p7/636	636	N	N	N	Y
i0_HQ_N_c117020/f14p8/810	810	N	N	Y	Y	i0_HQ_C_c1542/f2p4/900	900	N	N	N	Y
i0_HQ_N_c117029/f3p84/744	744	N	N	Y	N	i0_HQ_C_c15423/f2p1/724	724	N	N	Y	Y
i0_HQ_N_c117044/f3p8/600	600	Y	N	N	Y	i0_HQ_C_c15426/f3p2/581	581	N	N	Y	Y
i0_HQ_N_c117053/f2p1/677	677	N	N	Y	Y	i0_HQ_C_c15427/f2p0/529	529	Y	Y	Y	Y
i0_HQ_N_c11706/f2p1/510	510	Y	Y	Y	Y	i0_HQ_C_c15428/f3p3/464	464	N	N	Y	Y
i0_HQ_N_c117061/f3p1/473	473	Y	Y	Y	Y	i0_HQ_C_c1543/f3p50/943	943	N	N	Y	N
i0_HQ_N_c117071/f71p14/858	858	N	N	Y	N	i0_HQ_C_c1544/f4p1/289	289	Y	Y	Y	Y
i0_HQ_N_c117096/f3p9/735	735	N	N	Y	Y	i0_HQ_C_c15449/f3p2/465	465	N	Y	Y	Y
i0_HQ_N_c117126/f2p0/689	689	N	N	Y	Y	i0_HQ_C_c1546/f3p2/935	935	N	N	N	Y
i0_HQ_N_c117132/f2p3/314	314	Y	Y	Y	Y	i0_HQ_C_c1547/f3p3/697	697	Y	Y	Y	Y
i0_HQ_N_c117141/f70p109/855	855	Y	N	N	Y	i0_HQ_C_c1550/f4p0/490	490	N	N	Y	Y
i0_HQ_N_c117203/f17p3/460	460	N	N	N	Y	i0_HQ_C_c15500/f5p0/242	242	Y	Y	Y	Y
i0_HQ_N_c117212/f3p2/409	409	Y	N	Y	Y	i0_HQ_C_c1552/f3p0/419	419	Y	Y	Y	Y
i0_HQ_N_c11722/f2p2/840	840	N	N	N	Y	i0_HQ_C_c1553/f2p4/567	567	Y	Y	Y	Y
i0_HQ_N_c117220/f4p4/567	567	Y	N	Y	Y	i0_HQ_C_c15551/f2p0/237	237	Y	Y	Y	Y
i0_HQ_N_c117228/f136p42/976	976	N	N	Y	N	i0_HQ_C_c1556/f5p5/896	896	N	N	Y	N
i0_HQ_N_c117237/f6p19/412	412	Y	Y	Y	Y	i0_HQ_C_c15566/f2p0/243	243	Y	Y	Y	Y
i0_HQ_N_c11725/f4p2/423	423	Y	N	Y	Y	i0_HQ_C_c1557/f5p2/859	859	N	N	N	Y
i0_HQ_N_c117259/f10p0/229	229	Y	Y	Y	Y	i0_HQ_C_c1558/f7p3/884	884	N	N	N	Y
i0_HQ_N_c11726/f2p1/414	414	Y	Y	Y	Y	i0_HQ_C_c15587/f2p0/208	208	Y	Y	Y	Y
i0_HQ_N_c117273/f4p1/383	383	Y	N	N	Y	i0_HQ_C_c15595/f2p0/214	214	Y	Y	Y	Y
i0_HQ_N_c117280/f10p3/940	940	N	N	Y	Y	i0_HQ_C_c15598/f2p0/257	257	Y	Y	Y	Y
i0_HQ_N_c117290/f6p0/593	593	N	N	Y	Y	i0_HQ_C_c15599/f2p0/251	251	Y	Y	Y	Y
i0_HQ_N_c117292/f32p6/651	651	N	N	N	Y	i0_HQ_C_c1560/f2p0/459	459	N	N	N	Y
i0_HQ_N_c117297/f2p33/944	944	N	N	Y	Y	i0_HQ_C_c15608/f2p0/240	240	Y	Y	Y	Y
i0_HQ_N_c11732/f3p4/775	775	N	N	N	Y	i0_HQ_C_c1561/f5p5/746	746	N	N	Y	Y
i0_HQ_N_c117332/f3p6/694	694	N	N	N	Y	i0_HQ_C_c15610/f2p0/232	232	Y	Y	Y	Y
i0_HQ_N_c11735/f6p1/460	460	N	N	N	Y	i0_HQ_C_c15616/f2p0/209	209	Y	Y	Y	Y
i0_HQ_N_c117358/f3p33/885	885	N	N	N	Y	i0_HQ_C_c1562/f3p5/972	972	N	N	Y	Y
i0_HQ_N_c117388/f44p5/943	943	N	N	Y	Y	i0_HQ_C_c1563/f4p3/687	687	N	N	Y	Y
i0_HQ_N_c117389/f2p3/356	356	Y	Y	Y	Y	i0_HQ_C_c1564/f2p9/949	949	N	N	Y	Y
i0_HQ_N_c117465/f9p8/586	586	N	N	Y	Y	i0_HQ_C_c15640/f2p0/253	253	Y	Y	Y	Y
i0_HQ_N_c11747/f5p8/940	940	N	N	N	Y	i0_HQ_C_c1566/f2p3/863	863	N	Y	Y	Y
i0_HQ_N_c11748/f2p1/304	304	Y	Y	Y	Y	i0_HQ_C_c1567/f5p3/496	496	N	N	N	Y
i0_HQ_N_c11749/f2p0/425	425	Y	Y	Y	Y	i0_HQ_C_c1568/f2p2/329	329	Y	Y	Y	Y
i0_HQ_N_c117530/f4p16/580	580	Y	N	Y	Y	i0_HQ_C_c15704/f2p0/251	251	Y	Y	Y	Y
i0_HQ_N_c11754/f2p1/306	306	Y	Y	Y	Y	i0_HQ_C_c1571/f2p12/588	588	N	N	N	Y
i0_HQ_N_c117543/f2p1/800	800	N	N	Y	Y	i0_HQ_C_c15711/f3p0/262	262	Y	Y	Y	Y
i0_HQ_N_c117548/f6p16/491	491	Y	Y	Y	Y	i0_HQ_C_c15716/f2p0/255	255	Y	Y	Y	Y
i0_HQ_N_c117554/f5p0/543	543	Y	N	Y	Y	i0_HQ_C_c15749/f3p0/293	293	Y	Y	Y	Y
i0_HQ_N_c117568/f5p5/648	648	N	N	Y	Y	i0_HQ_C_c1576/f5p4/587	587	N	N	Y	N
i0_HQ_N_c117571/f3p3/779	779	N	N	N	Y	i0_HQ_C_c15761/f2p0/244	244	Y	Y	Y	Y
i0_HQ_N_c117573/f4p4/602	602	N	N	N	Y	i0_HQ_C_c15767/f6p1/356	356	Y	Y	Y	Y
i0_HQ_N_c117576/f5p7/644	644	N	N	N	Y	i0_HQ_C_c1578/f4p13/920	920	N	N	Y	Y
i0_HQ_N_c117596/f2p0/437	437	Y	N	Y	Y	i0_HQ_C_c1579/f3p0/377	377	Y	N	Y	Y
i0_HQ_N_c1176/f4p19/441	441	N	N	Y	Y	i0_HQ_C_c1580/f4p2/874	874	N	N	Y	Y
i0_HQ_N_c117611/f5p25/586	586	N	N	N	Y	i0_HQ_C_c15815/f2p0/266	266	Y	N	Y	Y
i0_HQ_N_c117622/f3p0/378	378	N	Y	Y	Y	i0_HQ_C_c1582/f2p4/723	723	N	N	N	Y
i0_HQ_N_c117640/f7p9/432	432	N	N	Y	Y	i0_HQ_C_c1583/f4p0/662	662	N	N	N	Y
i0_HQ_N_c117646/f3p4/867	867	N	N	Y	N	i0_HQ_C_c15832/f4p2/362	362	Y	Y	Y	Y
i0_HQ_N_c117654/f6p35/854	854	Y	N	Y	Y	i0_HQ_C_c1585/f6p0/623	623	N	N	Y	N
i0_HQ_N_c117661/f3p6/862	862	N	N	N	Y	i0_HQ_C_c1586/f3p1/408	408	N	Y	Y	Y
i0_HQ_N_c117664/f3p108/971	971	N	N	Y	N	i0_HQ_C_c1588/f2p1/406	406	Y	Y	Y	Y
i0_HQ_N_c117677/f3p12/554	554	Y	N	Y	Y	i0_HQ_C_c1589/f2p0/706	706	N	N	Y	Y
i0_HQ_N_c11768/f4p0/738	738	N	N	N	Y	i0_HQ_C_c1590/f2p84/767	767	N	N	N	Y
i0_HQ_N_c117689/f3p1/496	496	N	N	Y	Y	i0_HQ_C_c1591/f3p3/858	858	N	N	N	Y
i0_HQ_N_c117691/f5p67/973	973	N	N	N	Y	i0_HQ_C_c1593/f11p5/853	853	N	N	N	Y
i0_HQ_N_c117708/f3p223/436	436	Y	N	Y	Y	i0_HQ_C_c1595/f4p0/300	300	Y	N	Y	Y
i0_HQ_N_c117722/f2p5/441	441	N	N	Y	Y	i0_HQ_C_c1597/f2p1/788	788	N	N	Y	Y
i0_HQ_N_c117729/f2p11/981	981	N	N	N	Y	i0_HQ_C_c1600/f4p2/748	748	N	N	N	Y
i0_HQ_N_c117730/f4p4/497	497	Y	N	Y	Y	i0_HQ_C_c1601/f3p5/921	921	N	N	N	Y
i0_HQ_N_c117733/f2p5/426	426	N	N	Y	Y	i0_HQ_C_c16016/f2p0/250	250	Y	Y	Y	Y
i0_HQ_N_c117743/f2p2/679	679	N	N	N	Y	i0_HQ_C_c1602/f2p3/700	700	Y	N	Y	Y
i0_HQ_N_c117745/f2p2/750	750	N	N	Y	Y	i0_HQ_C_c1603/f3p0/415	415	N	Y	Y	Y
i0_HQ_N_c117748/f2p6/715	715	N	N	Y	Y	i0_HQ_C_c1604/f5p0/460	460	Y	Y	Y	Y
i0_HQ_N_c117750/f2p6/345	345	Y	Y	Y	Y	i0_HQ_C_c16044/f2p0/259	259	Y	Y	Y	Y
i0_HQ_N_c117760/f2p1/503	503	Y	N	Y	Y	i0_HQ_C_c16053/f2p0/259	259	Y	Y	Y	Y
i0_HQ_N_c117763/f4p10/780	780	N	N	N	Y	i0_HQ_C_c1606/f2p1/681	681	N	N	N	Y
i0_HQ_N_c117765/f3p100/352	352	Y	Y	Y	Y	i0_HQ_C_c1607/f2p8/573	573	Y	N	Y	Y
i0_HQ_N_c117766/f3p19/822	822	N	N	N	Y	i0_HQ_C_c16077/f2p0/259	259	Y	Y	Y	Y
i0_HQ_N_c117769/f2p22/582	582	N	N	Y	Y	i0_HQ_C_c1611/f4p112/412	412	N	N	Y	Y
i0_HQ_N_c117774/f2p6/464	464	N	N	Y	Y	i0_HQ_C_c16124/f3p0/261	261	Y	Y	Y	Y
i0_HQ_N_c117785/f2p11/839	839	N	N	N	Y	i0_HQ_C_c16127/f2p0/260	260	Y	Y	Y	Y
i0_HQ_N_c11779/f3p2/470	470	Y	N	Y	Y	i0_HQ_C_c16138/f2p0/259	259	Y	Y	Y	Y
i0_HQ_N_c117791/f2p2/570	570	N	N	N	Y	i0_HQ_C_c16146/f2p0/260	260	Y	Y	Y	Y
i0_HQ_N_c117794/f2p1/390	390	Y	N	Y	Y	i0_HQ_C_c16147/f2p0/239	239	Y	Y	Y	Y
i0_HQ_N_c117795/f3p8/375	375	Y	N	Y	Y	i0_HQ_C_c1615/f2p7/960	960	N	N	N	Y
i0_HQ_N_c1178/f4p4/527	527	Y	Y	Y	Y	i0_HQ_C_c1618/f3p0/818	818	N	N	N	Y
i0_HQ_N_c11780/f3p3/752	752	N	N	N	Y	i0_HQ_C_c1619/f2p3/689	689	N	N	N	Y
i0_HQ_N_c117800/f2p1/431	431	Y	Y	Y	Y	i0_HQ_C_c162/f14p9/705	705	N	N	N	Y
i0_HQ_N_c117803/f7p2/825	825	N	Y	Y	Y	i0_HQ_C_c16203/f2p0/251	251	Y	Y	Y	Y
i0_HQ_N_c11781/f2p3/559	559	N	N	Y	Y	i0_HQ_C_c1624/f5p1/292	292	Y	Y	Y	Y
i0_HQ_N_c117816/f2p5/611	611	N	N	N	Y	i0_HQ_C_c1625/f2p2/414	414	Y	Y	Y	Y
i0_HQ_N_c117820/f4p0/512	512	Y	Y	Y	Y	i0_HQ_C_c16255/f2p0/250	250	Y	Y	Y	Y
i0_HQ_N_c117822/f8p4/483	483	N	N	Y	Y	i0_HQ_C_c1626/f3p1/667	667	N	N	N	Y
i0_HQ_N_c117824/f7p32/679	679	N	N	N	Y	i0_HQ_C_c1627/f2p0/277	277	Y	Y	Y	Y
i0_HQ_N_c117828/f3p0/480	480	N	N	Y	Y	i0_HQ_C_c1628/f2p3/364	364	Y	Y	Y	Y
i0_HQ_N_c117834/f5p138/801	801	Y	N	N	Y	i0_HQ_C_c1629/f4p2/915	915	N	N	Y	N
i0_HQ_N_c117839/f7p8/611	611	N	N	N	Y	i0_HQ_C_c1630/f3p1/937	937	N	N	Y	Y
i0_HQ_N_c117847/f4p8/733	733	N	N	N	Y	i0_HQ_C_c16314/f2p0/251	251	Y	Y	Y	Y
i0_HQ_N_c117849/f2p6/956	956	N	N	N	Y	i0_HQ_C_c16319/f2p0/251	251	Y	Y	Y	Y
i0_HQ_N_c117852/f2p0/277	277	Y	Y	Y	Y	i0_HQ_C_c1632/f5p0/630	630	N	N	Y	Y
i0_HQ_N_c117857/f3p4/645	645	N	N	Y	Y	i0_HQ_C_c16339/f2p0/232	232	Y	Y	Y	Y
i0_HQ_N_c11787/f3p1/398	398	Y	N	Y	Y	i0_HQ_C_c1634/f3p0/757	757	N	N	N	Y
i0_HQ_N_c11795/f2p1/331	331	Y	Y	Y	Y	i0_HQ_C_c1635/f3p3/928	928	N	N	N	Y
i0_HQ_N_c11796/f2p0/274	274	Y	Y	Y	Y	i0_HQ_C_c1636/f5p2/867	867	N	N	Y	Y
i0_HQ_N_c11804/f2p2/675	675	N	Y	Y	Y	i0_HQ_C_c16365/f2p0/255	255	Y	Y	Y	Y
i0_HQ_N_c11808/f4p1/698	698	N	Y	Y	Y	i0_HQ_C_c16390/f2p0/240	240	Y	Y	Y	Y
i0_HQ_N_c1182/f2p5/711	711	N	N	N	Y	i0_HQ_C_c1640/f2p1/778	778	Y	N	N	Y
i0_HQ_N_c11821/f3p1/380	380	Y	N	Y	Y	i0_HQ_C_c1641/f2p2/486	486	Y	N	Y	Y
i0_HQ_N_c11827/f4p1/696	696	N	Y	Y	Y	i0_HQ_C_c16417/f3p0/260	260	Y	Y	Y	Y
i0_HQ_N_c118298/f2p82/657	657	N	N	Y	Y	i0_HQ_C_c1643/f4p5/811	811	N	N	N	Y
i0_HQ_N_c11830/f2p0/414	414	Y	Y	Y	Y	i0_HQ_C_c16447/f2p0/257	257	Y	Y	Y	Y
i0_HQ_N_c11831/f2p20/831	831	N	N	Y	Y	i0_HQ_C_c1645/f4p3/893	893	N	N	N	Y
i0_HQ_N_c11848/f4p2/991	991	N	N	Y	N	i0_HQ_C_c1651/f3p3/919	919	N	N	N	Y
i0_HQ_N_c11855/f6p1/691	691	N	N	N	Y	i0_HQ_C_c16529/f2p0/244	244	Y	Y	Y	Y
i0_HQ_N_c11865/f3p0/329	329	Y	Y	Y	Y	i0_HQ_C_c1653/f4p5/710	710	N	N	N	Y
i0_HQ_N_c11875/f3p9/539	539	Y	Y	Y	Y	i0_HQ_C_c16539/f2p0/258	258	Y	Y	Y	Y
i0_HQ_N_c11877/f2p0/487	487	Y	N	Y	Y	i0_HQ_C_c1655/f2p2/627	627	N	N	Y	Y
i0_HQ_N_c11879/f2p1/733	733	N	N	N	Y	i0_HQ_C_c1657/f2p1/748	748	N	N	N	Y
i0_HQ_N_c1188/f9p21/618	618	Y	Y	Y	Y	i0_HQ_C_c16574/f2p0/257	257	Y	Y	Y	Y
i0_HQ_N_c11880/f2p17/935	935	N	N	Y	Y	i0_HQ_C_c16579/f2p0/251	251	Y	Y	Y	Y
i0_HQ_N_c1189/f9p1/841	841	N	N	N	Y	i0_HQ_C_c1658/f3p2/950	950	N	N	N	Y
i0_HQ_N_c11893/f2p3/807	807	N	N	Y	Y	i0_HQ_C_c1660/f2p0/543	543	Y	N	Y	Y
i0_HQ_N_c11903/f3p2/860	860	N	N	Y	Y	i0_HQ_C_c16609/f2p0/256	256	Y	Y	Y	Y
i0_HQ_N_c11906/f3p6/998	998	Y	N	Y	Y	i0_HQ_C_c1661/f2p1/553	553	N	Y	Y	Y
i0_HQ_N_c1191/f5p5/721	721	N	N	Y	N	i0_HQ_C_c1662/f3p6/383	383	N	N	Y	Y
i0_HQ_N_c11915/f2p2/891	891	N	Y	Y	Y	i0_HQ_C_c16620/f4p0/337	337	Y	Y	Y	Y
i0_HQ_N_c11919/f2p4/478	478	N	N	Y	Y	i0_HQ_C_c1663/f3p86/542	542	Y	N	Y	Y
i0_HQ_N_c11924/f5p1/523	523	N	Y	Y	Y	i0_HQ_C_c16633/f8p0/284	284	Y	Y	Y	Y
i0_HQ_N_c11926/f2p3/884	884	N	N	N	Y	i0_HQ_C_c1664/f12p24/863	863	N	N	Y	Y
i0_HQ_N_c119493/f2p1/752	752	N	N	N	Y	i0_HQ_C_c1665/f2p3/1002	1002	N	N	Y	N
i0_HQ_N_c119499/f2p14/668	668	N	N	N	Y	i0_HQ_C_c1666/f6p1/960	960	N	N	N	Y
i0_HQ_N_c11956/f3p0/574	574	N	N	Y	Y	i0_HQ_C_c16669/f2p0/219	219	Y	Y	Y	Y
i0_HQ_N_c119587/f5p24/590	590	N	N	Y	Y	i0_HQ_C_c1667/f7p1/708	708	N	N	N	Y
i0_HQ_N_c1196/f10p1/898	898	Y	Y	Y	Y	i0_HQ_C_c16678/f2p0/367	367	N	N	Y	Y
i0_HQ_N_c11960/f2p0/973	973	N	N	N	Y	i0_HQ_C_c1668/f4p18/808	808	Y	N	Y	Y
i0_HQ_N_c11965/f2p0/452	452	N	N	Y	Y	i0_HQ_C_c1669/f2p0/300	300	Y	Y	Y	Y
i0_HQ_N_c11979/f6p5/711	711	N	N	N	Y	i0_HQ_C_c16697/f2p0/257	257	Y	Y	Y	Y
i0_HQ_N_c1198/f13p3/780	780	N	N	Y	Y	i0_HQ_C_c1670/f3p1/947	947	N	N	Y	N
i0_HQ_N_c11980/f4p0/962	962	N	N	Y	Y	i0_HQ_C_c1671/f2p4/744	744	N	N	Y	Y
i0_HQ_N_c1199/f6p5/948	948	N	N	N	Y	i0_HQ_C_c1672/f5p4/950	950	N	N	Y	Y
i0_HQ_N_c1200/f4p4/905	905	N	N	N	Y	i0_HQ_C_c1673/f2p0/781	781	N	N	Y	Y
i0_HQ_N_c12001/f7p10/457	457	N	N	Y	Y	i0_HQ_C_c16757/f4p0/240	240	Y	Y	Y	Y
i0_HQ_N_c12004/f3p36/856	856	Y	N	N	N	i0_HQ_C_c16766/f3p0/244	244	Y	Y	Y	Y
i0_HQ_N_c12006/f2p6/546	546	N	Y	Y	Y	i0_HQ_C_c1677/f2p6/784	784	N	N	N	Y
i0_HQ_N_c12007/f2p0/727	727	N	N	Y	Y	i0_HQ_C_c1678/f2p2/493	493	N	Y	Y	Y
i0_HQ_N_c120127/f2p7/508	508	N	N	Y	Y	i0_HQ_C_c1679/f3p2/302	302	Y	Y	Y	Y
i0_HQ_N_c1202/f3p1/343	343	N	N	Y	Y	i0_HQ_C_c16804/f2p0/254	254	Y	Y	Y	Y
i0_HQ_N_c12023/f3p0/742	742	N	N	Y	Y	i0_HQ_C_c16805/f2p0/257	257	Y	Y	Y	Y
i0_HQ_N_c12033/f5p2/754	754	N	N	N	Y	i0_HQ_C_c1682/f3p0/896	896	N	N	Y	Y
i0_HQ_N_c12037/f10p7/901	901	N	N	N	Y	i0_HQ_C_c16827/f2p0/238	238	Y	Y	Y	Y
i0_HQ_N_c12041/f2p1/572	572	Y	N	Y	Y	i0_HQ_C_c1683/f6p6/655	655	Y	Y	Y	N
i0_HQ_N_c12049/f2p2/498	498	N	N	N	Y	i0_HQ_C_c1684/f3p1/695	695	N	N	Y	Y
i0_HQ_N_c1206/f5p2/495	495	Y	N	Y	Y	i0_HQ_C_c16843/f2p0/245	245	Y	Y	Y	Y
i0_HQ_N_c12060/f2p0/421	421	N	N	Y	Y	i0_HQ_C_c1685/f3p1/704	704	N	Y	Y	Y
i0_HQ_N_c120608/f2p2/520	520	N	N	N	Y	i0_HQ_C_c1686/f3p1/949	949	N	N	N	Y
i0_HQ_N_c12061/f4p8/730	730	N	Y	Y	Y	i0_HQ_C_c1687/f3p11/363	363	N	N	Y	Y
i0_HQ_N_c12064/f2p3/993	993	N	N	Y	Y	i0_HQ_C_c1688/f10p1/368	368	Y	Y	Y	Y
i0_HQ_N_c120641/f2p9/709	709	N	N	Y	Y	i0_HQ_C_c16885/f2p0/256	256	Y	Y	Y	Y
i0_HQ_N_c1207/f9p2/863	863	N	N	Y	N	i0_HQ_C_c1689/f3p5/540	540	N	N	Y	Y
i0_HQ_N_c120742/f2p3/810	810	N	N	Y	N	i0_HQ_C_c16898/f2p0/251	251	Y	Y	Y	Y
i0_HQ_N_c12079/f2p5/449	449	Y	N	Y	Y	i0_HQ_C_c1690/f4p0/559	559	N	N	Y	Y
i0_HQ_N_c120832/f2p2/376	376	N	N	Y	Y	i0_HQ_C_c1692/f2p7/644	644	N	N	Y	Y
i0_HQ_N_c12092/f4p1/775	775	N	N	N	Y	i0_HQ_C_c16928/f3p0/259	259	Y	Y	Y	Y
i0_HQ_N_c1211/f5p1/869	869	N	N	N	Y	i0_HQ_C_c1693/f8p0/701	701	Y	Y	Y	Y
i0_HQ_N_c12113/f2p3/821	821	N	N	N	Y	i0_HQ_C_c1694/f2p1/823	823	N	N	Y	N
i0_HQ_N_c12115/f2p1/802	802	N	Y	Y	Y	i0_HQ_C_c16951/f2p0/252	252	Y	Y	Y	Y
i0_HQ_N_c12131/f4p1/692	692	N	N	Y	Y	i0_HQ_C_c16956/f2p0/245	245	Y	N	Y	Y
i0_HQ_N_c12140/f3p0/472	472	Y	Y	Y	Y	i0_HQ_C_c1697/f3p29/517	517	Y	Y	Y	Y
i0_HQ_N_c12142/f2p1/856	856	N	N	N	Y	i0_HQ_C_c16976/f2p0/246	246	Y	Y	Y	Y
i0_HQ_N_c12146/f5p0/491	491	N	N	Y	Y	i0_HQ_C_c1699/f2p46/351	351	Y	Y	Y	Y
i0_HQ_N_c12152/f3p0/407	407	N	Y	Y	Y	i0_HQ_C_c17005/f2p0/252	252	Y	N	Y	Y
i0_HQ_N_c12158/f3p0/745	745	N	N	Y	Y	i0_HQ_C_c17012/f2p0/245	245	N	N	Y	Y
i0_HQ_N_c121589/f3p9/666	666	N	N	Y	Y	i0_HQ_C_c1703/f2p4/706	706	Y	N	Y	Y
i0_HQ_N_c12160/f2p1/886	886	N	N	Y	Y	i0_HQ_C_c1705/f7p0/442	442	Y	Y	Y	Y
i0_HQ_N_c121721/f2p0/553	553	N	N	N	Y	i0_HQ_C_c17054/f4p0/285	285	Y	Y	Y	Y
i0_HQ_N_c12176/f2p0/414	414	N	N	Y	Y	i0_HQ_C_c1706/f4p0/579	579	N	Y	Y	Y
i0_HQ_N_c12178/f2p2/755	755	Y	N	Y	Y	i0_HQ_C_c1707/f6p2/968	968	N	N	Y	Y
i0_HQ_N_c12184/f2p56/418	418	Y	Y	Y	Y	i0_HQ_C_c1708/f2p1/554	554	N	N	N	Y
i0_HQ_N_c12188/f4p11/581	581	N	N	Y	Y	i0_HQ_C_c17099/f2p0/255	255	N	N	Y	Y
i0_HQ_N_c12189/f2p1/852	852	N	N	N	Y	i0_HQ_C_c1712/f3p1/315	315	Y	Y	Y	Y
i0_HQ_N_c12190/f2p12/748	748	N	N	N	Y	i0_HQ_C_c17124/f2p0/250	250	Y	Y	Y	Y
i0_HQ_N_c12196/f7p31/831	831	N	N	N	Y	i0_HQ_C_c1713/f4p10/601	601	N	N	N	Y
i0_HQ_N_c12200/f2p0/370	370	Y	Y	Y	Y	i0_HQ_C_c1714/f4p1/669	669	N	N	Y	Y
i0_HQ_N_c122296/f2p0/445	445	Y	N	Y	Y	i0_HQ_C_c1716/f3p111/766	766	Y	N	Y	Y
i0_HQ_N_c12232/f2p0/648	648	Y	N	Y	Y	i0_HQ_C_c17160/f2p0/257	257	Y	Y	Y	Y
i0_HQ_N_c12233/f2p1/621	621	Y	N	N	Y	i0_HQ_C_c1719/f3p0/840	840	N	N	N	Y
i0_HQ_N_c12241/f2p0/656	656	N	Y	Y	Y	i0_HQ_C_c17199/f3p3/449	449	Y	Y	Y	Y
i0_HQ_N_c12259/f8p5/700	700	N	N	N	Y	i0_HQ_C_c1721/f2p0/698	698	N	N	N	Y
i0_HQ_N_c122723/f7p0/240	240	Y	Y	Y	Y	i0_HQ_C_c1722/f2p0/673	673	N	Y	Y	Y
i0_HQ_N_c12274/f2p0/651	651	N	Y	Y	Y	i0_HQ_C_c1723/f4p1/445	445	N	N	Y	Y
i0_HQ_N_c1228/f14p8/688	688	N	N	N	Y	i0_HQ_C_c1724/f2p2/452	452	N	N	Y	Y
i0_HQ_N_c1230/f8p3/435	435	Y	N	Y	Y	i0_HQ_C_c1725/f4p4/607	607	N	N	Y	Y
i0_HQ_N_c123005/f5p7/704	704	N	N	N	Y	i0_HQ_C_c17251/f2p0/246	246	Y	N	Y	Y
i0_HQ_N_c12302/f2p1/737	737	N	N	N	Y	i0_HQ_C_c1727/f3p0/656	656	N	N	Y	Y
i0_HQ_N_c12304/f2p1/924	924	N	N	N	Y	i0_HQ_C_c17279/f2p0/256	256	Y	Y	Y	Y
i0_HQ_N_c123040/f2p1/959	959	N	N	N	Y	i0_HQ_C_c1728/f2p4/529	529	N	N	N	Y
i0_HQ_N_c123054/f2p3/335	335	Y	Y	Y	Y	i0_HQ_C_c17281/f2p0/249	249	Y	Y	Y	Y
i0_HQ_N_c12309/f2p1/829	829	N	Y	Y	Y	i0_HQ_C_c1729/f5p2/419	419	N	N	Y	Y
i0_HQ_N_c123167/f2p19/785	785	N	N	N	Y	i0_HQ_C_c1731/f5p4/719	719	N	N	Y	N
i0_HQ_N_c12317/f4p2/935	935	N	N	N	Y	i0_HQ_C_c1733/f6p0/630	630	N	N	Y	Y
i0_HQ_N_c12321/f2p2/305	305	Y	Y	Y	Y	i0_HQ_C_c1734/f2p0/336	336	Y	Y	Y	Y
i0_HQ_N_c12334/f2p0/313	313	Y	Y	Y	Y	i0_HQ_C_c1735/f6p9/971	971	Y	N	N	N
i0_HQ_N_c12338/f3p0/536	536	N	N	Y	Y	i0_HQ_C_c17367/f2p0/263	263	Y	Y	Y	Y
i0_HQ_N_c123411/f3p9/671	671	N	N	N	Y	i0_HQ_C_c1737/f5p1/708	708	N	N	N	Y
i0_HQ_N_c12342/f3p3/721	721	N	N	N	Y	i0_HQ_C_c1738/f5p2/586	586	N	N	Y	Y
i0_HQ_N_c12344/f5p3/845	845	N	Y	Y	Y	i0_HQ_C_c1741/f2p1/773	773	N	N	N	Y
i0_HQ_N_c123487/f4p6/541	541	N	N	Y	Y	i0_HQ_C_c17416/f2p0/220	220	Y	Y	Y	Y
i0_HQ_N_c1235/f12p5/736	736	N	N	N	Y	i0_HQ_C_c1742/f3p1/548	548	N	N	Y	Y
i0_HQ_N_c12350/f2p2/461	461	N	N	Y	Y	i0_HQ_C_c17438/f4p0/244	244	Y	Y	Y	Y
i0_HQ_N_c123502/f2p49/400	400	N	N	Y	Y	i0_HQ_C_c17447/f2p0/243	243	Y	Y	Y	Y
i0_HQ_N_c123543/f3p4/540	540	N	N	Y	Y	i0_HQ_C_c1745/f2p1/552	552	Y	N	N	Y
i0_HQ_N_c12360/f2p0/885	885	Y	N	N	N	i0_HQ_C_c17455/f2p0/208	208	Y	Y	Y	Y
i0_HQ_N_c123640/f3p19/748	748	N	N	N	Y	i0_HQ_C_c1746/f5p11/842	842	N	N	Y	Y
i0_HQ_N_c123663/f2p4/536	536	N	N	Y	Y	i0_HQ_C_c17462/f2p0/251	251	Y	Y	Y	Y
i0_HQ_N_c12369/f2p1/365	365	Y	Y	Y	Y	i0_HQ_C_c1750/f3p5/322	322	Y	Y	Y	Y
i0_HQ_N_c12372/f2p0/835	835	N	N	N	Y	i0_HQ_C_c1754/f4p0/440	440	N	N	Y	Y
i0_HQ_N_c123727/f2p59/565	565	N	N	N	Y	i0_HQ_C_c17544/f39p10/910	910	N	N	N	Y
i0_HQ_N_c12378/f2p32/992	992	Y	N	N	N	i0_HQ_C_c1755/f2p1/716	716	N	N	N	Y
i0_HQ_N_c12386/f2p215/802	802	Y	N	N	Y	i0_HQ_C_c17554/f49p11/842	842	N	N	N	Y
i0_HQ_N_c123888/f4p1/470	470	N	N	N	Y	i0_HQ_C_c17557/f32p17/467	467	N	N	Y	Y
i0_HQ_N_c12389/f2p3/826	826	N	N	N	Y	i0_HQ_C_c1756/f2p0/602	602	N	N	N	Y
i0_HQ_N_c12407/f2p11/1014	1014	N	N	N	Y	i0_HQ_C_c1758/f6p0/827	827	N	N	Y	N
i0_HQ_N_c1242/f17p5/610	610	N	Y	Y	Y	i0_HQ_C_c17595/f26p3/758	758	N	N	N	Y
i0_HQ_N_c124223/f2p2/328	328	Y	Y	Y	Y	i0_HQ_C_c17598/f28p28/780	780	N	Y	Y	N
i0_HQ_N_c12429/f3p4/741	741	N	N	Y	N	i0_HQ_C_c1761/f3p2/983	983	N	N	Y	Y
i0_HQ_N_c12434/f6p1/654	654	N	Y	Y	Y	i0_HQ_C_c17616/f22p9/792	792	N	N	Y	Y
i0_HQ_N_c124404/f3p6/836	836	N	N	Y	N	i0_HQ_C_c1762/f2p2/944	944	N	N	N	Y
i0_HQ_N_c12441/f4p4/836	836	N	N	N	Y	i0_HQ_C_c1763/f4p3/909	909	N	N	Y	Y
i0_HQ_N_c12445/f3p3/1007	1007	N	N	Y	N	i0_HQ_C_c1764/f2p0/682	682	N	N	N	Y
i0_HQ_N_c12449/f2p6/780	780	Y	N	Y	Y	i0_HQ_C_c17641/f24p3/387	387	N	N	Y	Y
i0_HQ_N_c1245/f11p3/586	586	N	N	Y	Y	i0_HQ_C_c1765/f3p1/496	496	Y	N	N	Y
i0_HQ_N_c12467/f3p1/541	541	N	Y	Y	Y	i0_HQ_C_c17653/f21p5/702	702	N	N	Y	Y
i0_HQ_N_c124757/f2p4/661	661	Y	N	N	Y	i0_HQ_C_c17654/f18p4/522	522	N	N	N	Y
i0_HQ_N_c12477/f2p0/364	364	N	N	Y	Y	i0_HQ_C_c17655/f17p1/578	578	N	N	N	Y
i0_HQ_N_c12478/f2p0/919	919	N	N	N	Y	i0_HQ_C_c17656/f10p4/690	690	N	N	N	Y
i0_HQ_N_c12486/f2p0/286	286	Y	Y	Y	Y	i0_HQ_C_c17676/f26p4/927	927	N	N	Y	Y
i0_HQ_N_c12493/f3p0/727	727	N	N	N	Y	i0_HQ_C_c1768/f2p1/410	410	Y	Y	Y	Y
i0_HQ_N_c1250/f11p6/959	959	N	N	N	Y	i0_HQ_C_c17681/f9p1/780	780	Y	N	N	Y
i0_HQ_N_c12504/f2p0/457	457	N	N	Y	Y	i0_HQ_C_c17683/f19p7/729	729	N	N	N	Y
i0_HQ_N_c125127/f3p3/325	325	Y	Y	Y	Y	i0_HQ_C_c1770/f2p1/1000	1000	N	N	N	Y
i0_HQ_N_c125146/f2p0/289	289	N	Y	Y	Y	i0_HQ_C_c17711/f16p6/567	567	N	N	Y	Y
i0_HQ_N_c1252/f6p0/631	631	Y	Y	Y	Y	i0_HQ_C_c17713/f10p8/982	982	N	N	Y	N
i0_HQ_N_c12521/f5p0/630	630	Y	N	Y	Y	i0_HQ_C_c1772/f2p74/872	872	N	N	Y	N
i0_HQ_N_c12523/f2p1/830	830	N	N	N	Y	i0_HQ_C_c17721/f5p1/510	510	N	N	N	Y
i0_HQ_N_c12529/f3p20/474	474	Y	Y	Y	Y	i0_HQ_C_c1773/f3p5/466	466	Y	Y	Y	Y
i0_HQ_N_c125448/f6p2/716	716	N	N	N	Y	i0_HQ_C_c17739/f6p1/725	725	N	N	Y	Y
i0_HQ_N_c12548/f4p1/665	665	Y	Y	Y	Y	i0_HQ_C_c1774/f3p4/962	962	N	N	Y	N
i0_HQ_N_c12554/f5p4/898	898	N	N	N	Y	i0_HQ_C_c17746/f3p0/569	569	N	N	Y	Y
i0_HQ_N_c125570/f2p6/410	410	Y	N	Y	Y	i0_HQ_C_c1776/f8p5/876	876	N	N	Y	N
i0_HQ_N_c12560/f5p1/399	399	N	Y	Y	Y	i0_HQ_C_c17760/f6p11/701	701	N	N	Y	N
i0_HQ_N_c125604/f3p0/423	423	N	N	Y	Y	i0_HQ_C_c17763/f4p1/302	302	Y	Y	Y	Y
i0_HQ_N_c12563/f2p0/569	569	N	N	Y	Y	i0_HQ_C_c17764/f9p2/567	567	N	N	N	Y
i0_HQ_N_c12567/f2p6/605	605	N	N	Y	Y	i0_HQ_C_c1777/f5p4/709	709	N	N	Y	Y
i0_HQ_N_c1257/f5p0/743	743	N	N	N	Y	i0_HQ_C_c1779/f3p0/533	533	N	N	N	Y
i0_HQ_N_c12570/f2p7/442	442	Y	Y	Y	Y	i0_HQ_C_c178/f21p11/552	552	N	N	Y	Y
i0_HQ_N_c125733/f2p1/690	690	N	N	Y	Y	i0_HQ_C_c17804/f11p4/794	794	N	N	Y	N
i0_HQ_N_c12574/f3p14/793	793	N	N	Y	Y	i0_HQ_C_c17807/f4p1/550	550	Y	Y	Y	Y
i0_HQ_N_c12577/f3p2/887	887	N	N	N	Y	i0_HQ_C_c1781/f2p13/927	927	Y	N	Y	Y
i0_HQ_N_c12584/f2p9/736	736	N	N	Y	Y	i0_HQ_C_c17817/f4p0/816	816	N	N	Y	Y
i0_HQ_N_c12586/f2p85/426	426	Y	N	Y	Y	i0_HQ_C_c1782/f2p2/835	835	Y	N	N	Y
i0_HQ_N_c125958/f2p0/717	717	N	N	Y	Y	i0_HQ_C_c17823/f5p45/331	331	Y	N	N	Y
i0_HQ_N_c12601/f2p11/827	827	N	N	N	Y	i0_HQ_C_c17828/f3p9/977	977	N	N	N	Y
i0_HQ_N_c12606/f4p2/455	455	N	N	Y	Y	i0_HQ_C_c1783/f5p0/745	745	N	N	Y	Y
i0_HQ_N_c12607/f3p0/273	273	Y	Y	Y	Y	i0_HQ_C_c17832/f5p0/276	276	Y	Y	Y	Y
i0_HQ_N_c12610/f3p14/985	985	N	N	Y	Y	i0_HQ_C_c17839/f4p1/633	633	N	N	Y	Y
i0_HQ_N_c126129/f4p3/588	588	N	N	Y	Y	i0_HQ_C_c17849/f2p0/388	388	Y	Y	Y	Y
i0_HQ_N_c12613/f2p0/290	290	Y	Y	Y	Y	i0_HQ_C_c17856/f9p1/780	780	N	N	N	Y
i0_HQ_N_c12622/f6p2/767	767	N	N	Y	Y	i0_HQ_C_c1786/f7p3/828	828	N	N	Y	N
i0_HQ_N_c12624/f4p8/710	710	N	N	Y	Y	i0_HQ_C_c17860/f2p1/854	854	N	Y	Y	Y
i0_HQ_N_c126252/f11p3/815	815	N	Y	Y	Y	i0_HQ_C_c17870/f6p25/452	452	Y	N	Y	Y
i0_HQ_N_c12627/f2p3/938	938	N	N	N	Y	i0_HQ_C_c17883/f3p0/239	239	Y	Y	Y	Y
i0_HQ_N_c126271/f10p2/831	831	N	N	Y	Y	i0_HQ_C_c17891/f3p1/318	318	Y	Y	Y	Y
i0_HQ_N_c126281/f10p0/294	294	Y	Y	Y	Y	i0_HQ_C_c17892/f3p0/278	278	Y	Y	Y	Y
i0_HQ_N_c126308/f4p204/754	754	Y	N	Y	Y	i0_HQ_C_c17896/f3p0/389	389	Y	N	Y	Y
i0_HQ_N_c126322/f2p6/960	960	N	N	Y	N	i0_HQ_C_c1790/f4p2/739	739	N	N	N	Y
i0_HQ_N_c126394/f4p0/253	253	Y	Y	Y	Y	i0_HQ_C_c17902/f2p0/288	288	Y	Y	Y	Y
i0_HQ_N_c1264/f7p10/854	854	N	N	Y	Y	i0_HQ_C_c17906/f4p0/274	274	Y	Y	Y	Y
i0_HQ_N_c126440/f5p0/262	262	Y	Y	Y	Y	i0_HQ_C_c17908/f4p0/645	645	N	N	N	Y
i0_HQ_N_c126475/f2p0/214	214	Y	Y	Y	Y	i0_HQ_C_c1791/f3p1/494	494	Y	N	Y	Y
i0_HQ_N_c126492/f4p1/856	856	N	N	N	Y	i0_HQ_C_c17913/f2p0/254	254	Y	Y	Y	Y
i0_HQ_N_c12651/f5p1/930	930	N	N	Y	N	i0_HQ_C_c17916/f2p0/209	209	Y	Y	Y	Y
i0_HQ_N_c126540/f4p0/220	220	Y	Y	Y	Y	i0_HQ_C_c1792/f6p11/857	857	N	N	N	Y
i0_HQ_N_c12656/f3p1/438	438	Y	N	Y	Y	i0_HQ_C_c17920/f2p0/361	361	Y	N	Y	Y
i0_HQ_N_c126563/f4p0/738	738	N	N	N	Y	i0_HQ_C_c1793/f5p3/305	305	Y	Y	Y	Y
i0_HQ_N_c12662/f3p2/857	857	N	N	Y	Y	i0_HQ_C_c17932/f2p0/232	232	Y	Y	Y	Y
i0_HQ_N_c126632/f6p0/222	222	Y	Y	Y	Y	i0_HQ_C_c17933/f2p0/256	256	Y	Y	Y	Y
i0_HQ_N_c126639/f5p8/896	896	N	N	N	Y	i0_HQ_C_c1794/f3p0/682	682	N	N	Y	Y
i0_HQ_N_c126642/f3p6/332	332	Y	Y	Y	Y	i0_HQ_C_c17940/f2p0/247	247	Y	Y	Y	Y
i0_HQ_N_c126645/f4p0/231	231	Y	Y	Y	Y	i0_HQ_C_c17944/f2p0/233	233	Y	Y	Y	Y
i0_HQ_N_c126653/f2p0/255	255	Y	Y	Y	Y	i0_HQ_C_c17946/f2p0/234	234	Y	Y	Y	Y
i0_HQ_N_c126691/f3p103/324	324	Y	Y	Y	Y	i0_HQ_C_c1795/f2p5/326	326	Y	Y	Y	Y
i0_HQ_N_c126692/f2p0/266	266	Y	Y	Y	Y	i0_HQ_C_c17958/f4p0/233	233	Y	Y	Y	Y
i0_HQ_N_c126730/f5p0/218	218	Y	Y	Y	Y	i0_HQ_C_c17959/f2p0/247	247	Y	Y	Y	Y
i0_HQ_N_c126747/f4p16/838	838	N	N	Y	N	i0_HQ_C_c17961/f2p0/256	256	Y	Y	Y	Y
i0_HQ_N_c126749/f2p0/347	347	Y	Y	Y	Y	i0_HQ_C_c17964/f2p0/252	252	Y	Y	Y	Y
i0_HQ_N_c126757/f2p0/227	227	Y	Y	Y	Y	i0_HQ_C_c17967/f2p0/292	292	Y	Y	Y	Y
i0_HQ_N_c12677/f2p1/573	573	N	N	N	Y	i0_HQ_C_c17970/f2p0/227	227	Y	Y	Y	Y
i0_HQ_N_c126794/f2p0/231	231	Y	Y	Y	Y	i0_HQ_C_c17971/f2p0/255	255	Y	Y	Y	Y
i0_HQ_N_c126799/f7p110/506	506	Y	N	N	Y	i0_HQ_C_c17974/f2p0/237	237	Y	Y	Y	Y
i0_HQ_N_c126800/f7p36/988	988	N	N	N	Y	i0_HQ_C_c17976/f2p0/236	236	Y	Y	Y	Y
i0_HQ_N_c126806/f8p6/307	307	Y	N	Y	Y	i0_HQ_C_c17979/f4p0/333	333	Y	N	Y	Y
i0_HQ_N_c126816/f4p0/221	221	Y	Y	Y	Y	i0_HQ_C_c17980/f2p0/262	262	Y	Y	Y	Y
i0_HQ_N_c126822/f5p0/225	225	Y	Y	Y	Y	i0_HQ_C_c17989/f2p0/224	224	Y	Y	Y	Y
i0_HQ_N_c126829/f3p0/209	209	Y	Y	Y	Y	i0_HQ_C_c1799/f3p3/530	530	N	N	N	Y
i0_HQ_N_c126849/f4p0/227	227	Y	Y	Y	Y	i0_HQ_C_c17990/f2p0/227	227	Y	Y	Y	Y
i0_HQ_N_c126856/f2p12/930	930	N	N	Y	Y	i0_HQ_C_c17998/f9p1/403	403	Y	N	Y	Y
i0_HQ_N_c126866/f2p0/234	234	Y	Y	Y	Y	i0_HQ_C_c18001/f2p0/294	294	Y	Y	Y	Y
i0_HQ_N_c126896/f5p0/230	230	Y	Y	Y	Y	i0_HQ_C_c18002/f2p0/216	216	Y	Y	Y	Y
i0_HQ_N_c12693/f2p3/563	563	N	Y	Y	N	i0_HQ_C_c18003/f2p0/218	218	Y	Y	Y	Y
i0_HQ_N_c126933/f3p0/225	225	Y	Y	Y	Y	i0_HQ_C_c18006/f2p0/254	254	Y	Y	Y	Y
i0_HQ_N_c126944/f3p0/286	286	Y	Y	Y	Y	i0_HQ_C_c18009/f2p0/223	223	Y	Y	Y	Y
i0_HQ_N_c126948/f3p11/437	437	N	N	Y	Y	i0_HQ_C_c1801/f5p3/454	454	Y	Y	Y	Y
i0_HQ_N_c126951/f3p0/219	219	Y	Y	Y	Y	i0_HQ_C_c18011/f3p0/433	433	N	N	Y	Y
i0_HQ_N_c126987/f2p0/247	247	Y	Y	Y	Y	i0_HQ_C_c18019/f2p49/451	451	Y	N	Y	Y
i0_HQ_N_c12699/f2p1/991	991	N	N	Y	N	i0_HQ_C_c1802/f5p2/429	429	N	N	Y	Y
i0_HQ_N_c127/f41p4/608	608	N	N	N	Y	i0_HQ_C_c18021/f3p5/448	448	Y	Y	Y	Y
i0_HQ_N_c127010/f4p0/227	227	Y	Y	Y	Y	i0_HQ_C_c18023/f2p0/251	251	Y	Y	Y	Y
i0_HQ_N_c127025/f3p0/213	213	Y	Y	Y	Y	i0_HQ_C_c18029/f2p0/257	257	Y	Y	Y	Y
i0_HQ_N_c127049/f3p0/233	233	Y	Y	Y	Y	i0_HQ_C_c1803/f4p1/861	861	N	N	Y	N
i0_HQ_N_c12706/f2p5/333	333	Y	Y	Y	Y	i0_HQ_C_c18030/f2p0/255	255	Y	Y	Y	Y
i0_HQ_N_c127116/f2p0/225	225	Y	Y	Y	Y	i0_HQ_C_c18037/f3p1/298	298	Y	Y	Y	Y
i0_HQ_N_c127127/f2p0/243	243	Y	Y	Y	Y	i0_HQ_C_c18039/f2p0/210	210	Y	Y	Y	Y
i0_HQ_N_c127128/f2p0/233	233	Y	Y	Y	Y	i0_HQ_C_c1804/f9p1/788	788	N	N	N	Y
i0_HQ_N_c127131/f4p0/856	856	N	N	N	Y	i0_HQ_C_c18041/f2p0/230	230	Y	Y	Y	Y
i0_HQ_N_c127133/f2p15/877	877	N	N	Y	Y	i0_HQ_C_c1806/f5p2/934	934	N	N	N	Y
i0_HQ_N_c127144/f2p0/245	245	Y	Y	Y	Y	i0_HQ_C_c18060/f3p4/504	504	Y	N	N	Y
i0_HQ_N_c127151/f2p0/223	223	Y	Y	Y	Y	i0_HQ_C_c18070/f6p0/658	658	N	N	Y	Y
i0_HQ_N_c127153/f2p0/217	217	Y	Y	Y	Y	i0_HQ_C_c1808/f3p8/564	564	Y	Y	Y	Y
i0_HQ_N_c127172/f2p0/267	267	Y	Y	Y	Y	i0_HQ_C_c18086/f3p0/620	620	N	Y	Y	Y
i0_HQ_N_c127176/f2p1/595	595	N	N	Y	Y	i0_HQ_C_c1809/f2p0/288	288	Y	Y	Y	Y
i0_HQ_N_c127178/f4p16/566	566	N	N	N	Y	i0_HQ_C_c18104/f5p10/633	633	N	N	N	Y
i0_HQ_N_c127194/f2p2/343	343	Y	Y	Y	Y	i0_HQ_C_c1811/f4p0/620	620	N	N	Y	Y
i0_HQ_N_c127198/f2p2/660	660	N	N	Y	Y	i0_HQ_C_c1813/f4p4/431	431	N	N	Y	Y
i0_HQ_N_c127203/f4p8/455	455	Y	Y	Y	Y	i0_HQ_C_c1816/f2p1/932	932	N	N	Y	N
i0_HQ_N_c127209/f2p2/550	550	N	N	Y	Y	i0_HQ_C_c18168/f3p0/733	733	N	N	Y	Y
i0_HQ_N_c127213/f4p7/701	701	N	N	Y	Y	i0_HQ_C_c1817/f2p0/354	354	Y	Y	Y	Y
i0_HQ_N_c127217/f2p6/332	332	Y	Y	Y	Y	i0_HQ_C_c1818/f3p3/477	477	N	N	Y	Y
i0_HQ_N_c127222/f2p0/220	220	Y	Y	Y	Y	i0_HQ_C_c1820/f2p2/531	531	N	N	Y	Y
i0_HQ_N_c127223/f3p0/261	261	N	Y	Y	Y	i0_HQ_C_c1822/f4p7/491	491	N	N	Y	Y
i0_HQ_N_c127224/f2p0/211	211	Y	Y	Y	Y	i0_HQ_C_c18236/f3p1/952	952	N	N	Y	N
i0_HQ_N_c127231/f2p0/384	384	Y	Y	Y	Y	i0_HQ_C_c1824/f2p2/357	357	Y	Y	Y	Y
i0_HQ_N_c127235/f4p0/483	483	N	Y	Y	Y	i0_HQ_C_c1825/f4p1/848	848	N	N	Y	Y
i0_HQ_N_c127239/f2p0/223	223	Y	Y	Y	Y	i0_HQ_C_c1826/f4p2/365	365	Y	Y	Y	Y
i0_HQ_N_c12724/f2p4/607	607	N	N	Y	Y	i0_HQ_C_c1828/f2p1/756	756	N	N	Y	Y
i0_HQ_N_c127242/f2p0/241	241	Y	Y	Y	Y	i0_HQ_C_c1829/f8p1/896	896	N	N	N	Y
i0_HQ_N_c127267/f2p1/433	433	N	Y	Y	Y	i0_HQ_C_c1830/f4p0/864	864	N	Y	Y	Y
i0_HQ_N_c127280/f2p0/230	230	Y	Y	Y	Y	i0_HQ_C_c1831/f2p1/463	463	N	N	Y	Y
i0_HQ_N_c127282/f2p0/609	609	N	N	N	Y	i0_HQ_C_c18329/f6p1/890	890	N	N	Y	Y
i0_HQ_N_c127284/f2p2/391	391	Y	Y	Y	Y	i0_HQ_C_c18365/f10p10/471	471	N	N	Y	Y
i0_HQ_N_c127297/f3p2/407	407	Y	N	Y	Y	i0_HQ_C_c1837/f2p0/325	325	Y	N	Y	Y
i0_HQ_N_c1273/f4p1/746	746	N	Y	Y	Y	i0_HQ_C_c1839/f3p1/514	514	Y	Y	Y	Y
i0_HQ_N_c127305/f2p0/233	233	Y	Y	Y	Y	i0_HQ_C_c1840/f11p2/444	444	Y	N	Y	Y
i0_HQ_N_c127306/f2p0/211	211	Y	Y	Y	Y	i0_HQ_C_c18409/f4p0/290	290	Y	Y	Y	Y
i0_HQ_N_c127314/f2p3/299	299	Y	N	Y	Y	i0_HQ_C_c1841/f2p1/832	832	N	N	Y	Y
i0_HQ_N_c127316/f2p2/302	302	Y	Y	Y	Y	i0_HQ_C_c1843/f4p1/798	798	N	N	N	Y
i0_HQ_N_c12732/f2p1/840	840	N	N	N	Y	i0_HQ_C_c1845/f2p8/597	597	Y	N	N	Y
i0_HQ_N_c127323/f2p0/353	353	Y	Y	Y	Y	i0_HQ_C_c18450/f5p2/814	814	N	N	N	Y
i0_HQ_N_c127333/f3p0/229	229	Y	Y	Y	Y	i0_HQ_C_c18460/f7p1/788	788	N	N	N	Y
i0_HQ_N_c12748/f2p4/546	546	Y	Y	Y	Y	i0_HQ_C_c18465/f7p8/751	751	N	N	N	Y
i0_HQ_N_c12754/f2p0/634	634	Y	Y	Y	Y	i0_HQ_C_c18467/f8p0/770	770	N	N	Y	N
i0_HQ_N_c12756/f2p0/679	679	N	N	Y	Y	i0_HQ_C_c1847/f2p43/868	868	N	N	N	Y
i0_HQ_N_c12763/f2p0/334	334	Y	Y	Y	Y	i0_HQ_C_c18488/f8p4/825	825	N	N	Y	Y
i0_HQ_N_c12765/f4p1/767	767	N	N	N	Y	i0_HQ_C_c1849/f2p0/356	356	N	N	N	Y
i0_HQ_N_c12771/f3p3/553	553	Y	N	Y	Y	i0_HQ_C_c1850/f2p1/772	772	N	N	Y	Y
i0_HQ_N_c12777/f3p5/990	990	N	N	Y	Y	i0_HQ_C_c1851/f3p18/561	561	Y	N	Y	Y
i0_HQ_N_c127793/f3p0/223	223	Y	Y	Y	Y	i0_HQ_C_c1854/f3p5/566	566	N	N	Y	Y
i0_HQ_N_c12786/f2p1/721	721	N	Y	Y	N	i0_HQ_C_c18543/f4p1/693	693	N	Y	Y	N
i0_HQ_N_c12793/f3p0/572	572	N	N	N	Y	i0_HQ_C_c18547/f4p33/541	541	N	N	Y	Y
i0_HQ_N_c127990/f2p0/519	519	N	N	Y	Y	i0_HQ_C_c18552/f9p1/608	608	N	N	N	Y
i0_HQ_N_c12803/f2p1/383	383	Y	Y	Y	Y	i0_HQ_C_c18564/f4p11/933	933	N	N	Y	Y
i0_HQ_N_c128134/f2p0/214	214	Y	Y	Y	Y	i0_HQ_C_c1858/f3p0/602	602	N	N	Y	Y
i0_HQ_N_c12816/f3p7/488	488	N	N	Y	Y	i0_HQ_C_c18589/f10p2/572	572	N	Y	Y	Y
i0_HQ_N_c1282/f6p4/635	635	N	N	Y	Y	i0_HQ_C_c1860/f5p4/810	810	N	N	Y	N
i0_HQ_N_c128222/f2p0/218	218	Y	Y	Y	Y	i0_HQ_C_c1861/f6p1/827	827	N	N	Y	N
i0_HQ_N_c128251/f2p0/225	225	Y	Y	Y	Y	i0_HQ_C_c18613/f3p4/654	654	N	N	N	Y
i0_HQ_N_c128280/f2p0/242	242	Y	Y	Y	Y	i0_HQ_C_c1862/f5p3/479	479	N	N	Y	Y
i0_HQ_N_c12834/f2p3/472	472	N	N	N	Y	i0_HQ_C_c1866/f5p1/656	656	N	N	N	Y
i0_HQ_N_c128594/f5p0/238	238	Y	Y	Y	Y	i0_HQ_C_c18663/f3p1/309	309	Y	Y	Y	Y
i0_HQ_N_c1286/f22p3/695	695	N	N	Y	Y	i0_HQ_C_c1867/f2p1/501	501	N	N	Y	Y
i0_HQ_N_c12864/f6p2/724	724	N	N	N	Y	i0_HQ_C_c18670/f4p0/630	630	N	N	N	Y
i0_HQ_N_c12870/f2p0/971	971	N	N	N	Y	i0_HQ_C_c18671/f3p13/576	576	Y	N	Y	Y
i0_HQ_N_c12873/f2p1/597	597	N	N	N	Y	i0_HQ_C_c18672/f3p1/318	318	Y	Y	Y	Y
i0_HQ_N_c128805/f3p0/213	213	Y	Y	Y	Y	i0_HQ_C_c1868/f3p5/477	477	N	Y	Y	Y
i0_HQ_N_c12881/f2p0/846	846	N	N	N	Y	i0_HQ_C_c18683/f5p1/771	771	N	N	N	Y
i0_HQ_N_c12892/f3p3/966	966	N	N	Y	Y	i0_HQ_C_c18687/f4p4/680	680	N	N	N	Y
i0_HQ_N_c128926/f2p0/209	209	Y	Y	Y	Y	i0_HQ_C_c18688/f4p1/481	481	N	N	Y	Y
i0_HQ_N_c128943/f2p2/637	637	N	N	N	Y	i0_HQ_C_c1869/f2p2/315	315	Y	Y	Y	Y
i0_HQ_N_c129040/f2p0/217	217	Y	Y	Y	Y	i0_HQ_C_c18697/f3p5/715	715	N	Y	Y	Y
i0_HQ_N_c12905/f2p0/571	571	Y	Y	Y	Y	i0_HQ_C_c1870/f2p2/492	492	N	N	Y	Y
i0_HQ_N_c12925/f2p0/592	592	Y	Y	Y	Y	i0_HQ_C_c18709/f5p6/520	520	N	N	Y	Y
i0_HQ_N_c129385/f2p0/225	225	Y	Y	Y	Y	i0_HQ_C_c18714/f4p0/280	280	Y	Y	Y	Y
i0_HQ_N_c129396/f2p0/234	234	Y	Y	Y	Y	i0_HQ_C_c18717/f4p1/437	437	Y	Y	Y	Y
i0_HQ_N_c12941/f2p0/280	280	Y	Y	Y	Y	i0_HQ_C_c18719/f7p3/488	488	N	N	Y	Y
i0_HQ_N_c12945/f2p0/631	631	Y	Y	Y	Y	i0_HQ_C_c18722/f4p235/459	459	Y	Y	Y	Y
i0_HQ_N_c129482/f2p6/473	473	N	N	Y	Y	i0_HQ_C_c18724/f4p2/530	530	N	Y	Y	Y
i0_HQ_N_c129485/f2p0/221	221	Y	Y	Y	Y	i0_HQ_C_c18726/f4p2/839	839	N	N	N	Y
i0_HQ_N_c129565/f5p3/970	970	N	N	Y	N	i0_HQ_C_c1873/f3p4/749	749	N	N	Y	Y
i0_HQ_N_c129576/f2p0/231	231	Y	Y	Y	Y	i0_HQ_C_c18736/f4p5/798	798	N	N	N	Y
i0_HQ_N_c129683/f2p0/418	418	Y	Y	Y	Y	i0_HQ_C_c1874/f2p0/646	646	N	N	Y	Y
i0_HQ_N_c12969/f4p1/981	981	N	N	N	Y	i0_HQ_C_c18740/f3p2/738	738	N	N	N	Y
i0_HQ_N_c12981/f2p0/275	275	Y	Y	Y	Y	i0_HQ_C_c18744/f3p0/596	596	N	N	Y	Y
i0_HQ_N_c12992/f5p0/835	835	N	Y	Y	Y	i0_HQ_C_c1875/f2p1/437	437	N	N	Y	Y
i0_HQ_N_c12994/f2p0/289	289	Y	Y	Y	Y	i0_HQ_C_c18757/f4p1/679	679	N	N	Y	Y
i0_HQ_N_c129953/f3p0/224	224	Y	Y	Y	Y	i0_HQ_C_c1876/f5p0/628	628	N	Y	Y	Y
i0_HQ_N_c12998/f2p3/800	800	N	N	Y	Y	i0_HQ_C_c18763/f3p2/369	369	Y	N	Y	Y
i0_HQ_N_c13009/f2p2/682	682	N	N	Y	Y	i0_HQ_C_c18773/f7p0/258	258	Y	Y	Y	Y
i0_HQ_N_c13021/f2p4/573	573	N	N	N	Y	i0_HQ_C_c18775/f4p2/882	882	N	N	N	Y
i0_HQ_N_c13022/f3p1/757	757	N	N	Y	Y	i0_HQ_C_c18776/f4p4/454	454	Y	Y	Y	Y
i0_HQ_N_c130223/f2p0/260	260	Y	Y	Y	Y	i0_HQ_C_c18779/f4p0/639	639	Y	Y	Y	Y
i0_HQ_N_c130268/f2p0/219	219	Y	Y	Y	Y	i0_HQ_C_c1878/f2p3/593	593	Y	Y	Y	Y
i0_HQ_N_c13033/f2p13/848	848	N	N	N	Y	i0_HQ_C_c18782/f5p81/984	984	N	N	Y	N
i0_HQ_N_c13038/f2p1/513	513	N	Y	Y	Y	i0_HQ_C_c18784/f3p3/550	550	N	N	Y	Y
i0_HQ_N_c130400/f3p2/353	353	Y	Y	Y	Y	i0_HQ_C_c18789/f4p4/718	718	Y	N	Y	Y
i0_HQ_N_c13042/f2p7/584	584	N	N	N	Y	i0_HQ_C_c1879/f5p1/725	725	N	N	N	Y
i0_HQ_N_c13046/f5p1/899	899	N	N	N	Y	i0_HQ_C_c18793/f4p1/398	398	Y	N	Y	Y
i0_HQ_N_c13049/f2p0/428	428	Y	N	Y	Y	i0_HQ_C_c18796/f7p2/504	504	N	N	Y	Y
i0_HQ_N_c13050/f3p0/621	621	N	Y	Y	Y	i0_HQ_C_c1880/f6p0/956	956	N	N	Y	N
i0_HQ_N_c13055/f2p0/437	437	Y	N	Y	Y	i0_HQ_C_c18800/f3p1/857	857	N	N	N	Y
i0_HQ_N_c130550/f2p0/222	222	Y	Y	Y	Y	i0_HQ_C_c18804/f8p1/664	664	N	N	Y	Y
i0_HQ_N_c1306/f17p1/311	311	Y	Y	Y	Y	i0_HQ_C_c1882/f3p5/794	794	N	N	N	Y
i0_HQ_N_c13060/f2p0/706	706	N	N	Y	Y	i0_HQ_C_c18820/f3p0/264	264	Y	Y	Y	Y
i0_HQ_N_c13061/f6p0/905	905	N	N	N	Y	i0_HQ_C_c18822/f5p0/511	511	N	Y	Y	Y
i0_HQ_N_c13064/f2p0/440	440	Y	Y	Y	Y	i0_HQ_C_c1883/f2p4/702	702	N	N	Y	Y
i0_HQ_N_c13068/f2p3/969	969	N	N	Y	N	i0_HQ_C_c18830/f5p1/632	632	N	N	Y	Y
i0_HQ_N_c1307/f19p5/755	755	N	Y	Y	Y	i0_HQ_C_c18832/f6p7/692	692	N	N	N	Y
i0_HQ_N_c13074/f2p1/873	873	N	N	Y	Y	i0_HQ_C_c18836/f6p1/737	737	Y	Y	Y	Y
i0_HQ_N_c13083/f2p0/995	995	N	N	Y	N	i0_HQ_C_c18848/f3p0/296	296	Y	Y	Y	Y
i0_HQ_N_c13099/f6p0/491	491	N	Y	Y	Y	i0_HQ_C_c18860/f3p1/554	554	Y	Y	Y	Y
i0_HQ_N_c131030/f3p0/226	226	Y	Y	Y	Y	i0_HQ_C_c18861/f3p6/661	661	N	N	N	Y
i0_HQ_N_c13122/f2p0/950	950	N	Y	Y	Y	i0_HQ_C_c18862/f3p0/419	419	Y	Y	Y	Y
i0_HQ_N_c131266/f3p8/781	781	N	N	Y	Y	i0_HQ_C_c18863/f5p3/795	795	N	N	N	Y
i0_HQ_N_c131305/f2p0/235	235	Y	Y	Y	Y	i0_HQ_C_c18869/f2p8/999	999	N	N	N	Y
i0_HQ_N_c131328/f2p0/223	223	Y	Y	Y	Y	i0_HQ_C_c18873/f5p1/671	671	N	N	Y	N
i0_HQ_N_c13137/f4p1/696	696	N	N	N	Y	i0_HQ_C_c18887/f3p2/581	581	Y	N	Y	Y
i0_HQ_N_c131381/f2p8/546	546	Y	N	Y	Y	i0_HQ_C_c18888/f2p1/833	833	N	N	N	Y
i0_HQ_N_c131525/f2p0/286	286	Y	Y	Y	Y	i0_HQ_C_c1889/f7p1/577	577	N	Y	Y	Y
i0_HQ_N_c13158/f2p1/614	614	N	N	Y	Y	i0_HQ_C_c1890/f7p2/565	565	N	N	N	Y
i0_HQ_N_c13176/f3p0/636	636	Y	Y	N	Y	i0_HQ_C_c18915/f2p2/784	784	N	N	N	Y
i0_HQ_N_c131839/f2p0/277	277	Y	Y	Y	Y	i0_HQ_C_c18923/f5p50/504	504	Y	N	Y	Y
i0_HQ_N_c13189/f3p3/350	350	Y	Y	Y	Y	i0_HQ_C_c18925/f5p3/708	708	N	N	N	Y
i0_HQ_N_c13196/f3p0/688	688	N	N	N	Y	i0_HQ_C_c18927/f2p0/682	682	Y	Y	Y	Y
i0_HQ_N_c13199/f3p2/922	922	N	N	N	Y	i0_HQ_C_c18928/f4p0/804	804	N	N	N	Y
i0_HQ_N_c132/f43p6/620	620	N	Y	Y	Y	i0_HQ_C_c18929/f2p2/537	537	N	N	Y	Y
i0_HQ_N_c13200/f2p2/813	813	N	N	N	Y	i0_HQ_C_c18933/f2p19/379	379	Y	Y	Y	Y
i0_HQ_N_c13201/f2p1/922	922	N	N	Y	Y	i0_HQ_C_c18934/f2p14/361	361	N	N	Y	Y
i0_HQ_N_c13203/f7p1/459	459	N	N	Y	Y	i0_HQ_C_c18936/f2p1/472	472	Y	Y	Y	Y
i0_HQ_N_c132032/f2p0/227	227	Y	Y	Y	Y	i0_HQ_C_c18938/f4p2/829	829	N	N	N	Y
i0_HQ_N_c132121/f3p5/354	354	Y	N	Y	Y	i0_HQ_C_c18939/f2p2/971	971	N	N	N	Y
i0_HQ_N_c132161/f2p0/254	254	Y	Y	Y	Y	i0_HQ_C_c1894/f2p1/495	495	N	N	N	Y
i0_HQ_N_c132211/f3p1/350	350	Y	Y	Y	Y	i0_HQ_C_c18940/f5p6/406	406	Y	N	Y	Y
i0_HQ_N_c13225/f4p0/679	679	N	N	Y	Y	i0_HQ_C_c18941/f2p0/284	284	Y	Y	Y	Y
i0_HQ_N_c132252/f2p0/214	214	Y	Y	Y	Y	i0_HQ_C_c18942/f2p0/250	250	Y	Y	Y	Y
i0_HQ_N_c13240/f2p6/384	384	Y	N	Y	Y	i0_HQ_C_c18946/f3p6/626	626	Y	N	Y	Y
i0_HQ_N_c13241/f2p1/823	823	N	N	Y	N	i0_HQ_C_c18949/f3p2/774	774	Y	N	N	N
i0_HQ_N_c132451/f3p22/452	452	Y	N	Y	Y	i0_HQ_C_c1895/f3p0/510	510	N	N	Y	Y
i0_HQ_N_c13255/f2p3/934	934	N	N	N	Y	i0_HQ_C_c18951/f2p0/293	293	Y	Y	Y	Y
i0_HQ_N_c132667/f2p0/214	214	Y	N	Y	Y	i0_HQ_C_c18953/f2p3/706	706	N	N	Y	Y
i0_HQ_N_c13268/f4p5/308	308	N	N	Y	Y	i0_HQ_C_c18954/f5p0/707	707	N	N	Y	N
i0_HQ_N_c13274/f3p60/834	834	N	N	Y	Y	i0_HQ_C_c18958/f2p0/516	516	Y	N	N	Y
i0_HQ_N_c13281/f2p0/702	702	N	N	Y	Y	i0_HQ_C_c18959/f2p18/799	799	N	N	Y	Y
i0_HQ_N_c13283/f2p0/830	830	N	N	Y	N	i0_HQ_C_c18960/f3p10/395	395	Y	N	Y	Y
i0_HQ_N_c132872/f8p3/541	541	N	N	Y	Y	i0_HQ_C_c18961/f2p0/860	860	N	Y	Y	Y
i0_HQ_N_c13288/f2p5/585	585	N	N	Y	Y	i0_HQ_C_c18962/f2p4/350	350	Y	N	Y	Y
i0_HQ_N_c13292/f2p7/533	533	N	N	Y	Y	i0_HQ_C_c18963/f2p2/921	921	Y	N	Y	Y
i0_HQ_N_c13317/f2p10/322	322	Y	N	N	Y	i0_HQ_C_c18964/f2p3/640	640	N	N	Y	Y
i0_HQ_N_c133222/f2p0/216	216	Y	Y	Y	Y	i0_HQ_C_c18966/f2p1/377	377	Y	Y	Y	Y
i0_HQ_N_c13331/f4p2/782	782	N	N	Y	Y	i0_HQ_C_c18970/f2p5/772	772	N	N	Y	Y
i0_HQ_N_c13336/f3p3/916	916	N	N	Y	Y	i0_HQ_C_c18973/f4p4/665	665	Y	N	Y	Y
i0_HQ_N_c13338/f2p0/487	487	Y	Y	Y	Y	i0_HQ_C_c18975/f2p3/283	283	Y	N	Y	Y
i0_HQ_N_c13344/f6p7/618	618	Y	Y	Y	Y	i0_HQ_C_c18976/f3p24/449	449	N	N	Y	Y
i0_HQ_N_c133547/f2p0/221	221	Y	Y	Y	Y	i0_HQ_C_c18978/f4p2/723	723	N	N	Y	N
i0_HQ_N_c133584/f2p0/213	213	Y	Y	Y	Y	i0_HQ_C_c1898/f2p31/394	394	Y	Y	Y	Y
i0_HQ_N_c13360/f2p2/941	941	N	N	Y	N	i0_HQ_C_c18981/f4p0/859	859	N	N	N	Y
i0_HQ_N_c13361/f2p3/977	977	N	Y	Y	Y	i0_HQ_C_c18983/f2p2/514	514	Y	Y	Y	Y
i0_HQ_N_c133625/f2p4/829	829	N	N	N	Y	i0_HQ_C_c18985/f2p0/310	310	Y	Y	Y	Y
i0_HQ_N_c13365/f3p0/769	769	N	N	Y	Y	i0_HQ_C_c18986/f3p0/555	555	N	N	Y	N
i0_HQ_N_c133659/f2p0/222	222	Y	Y	Y	Y	i0_HQ_C_c18987/f2p0/582	582	N	N	Y	Y
i0_HQ_N_c13366/f2p2/353	353	Y	Y	Y	Y	i0_HQ_C_c18989/f2p0/428	428	Y	N	Y	Y
i0_HQ_N_c1337/f8p3/893	893	N	N	Y	Y	i0_HQ_C_c18990/f3p3/687	687	N	N	N	Y
i0_HQ_N_c133789/f2p0/219	219	Y	Y	Y	Y	i0_HQ_C_c18994/f6p3/377	377	Y	Y	Y	Y
i0_HQ_N_c133851/f3p20/555	555	N	N	N	Y	i0_HQ_C_c18995/f6p0/269	269	Y	Y	Y	Y
i0_HQ_N_c13389/f2p3/492	492	N	N	Y	Y	i0_HQ_C_c18997/f3p0/661	661	N	N	Y	Y
i0_HQ_N_c13394/f2p0/615	615	N	N	N	Y	i0_HQ_C_c18998/f4p0/572	572	N	N	Y	Y
i0_HQ_N_c133944/f2p0/227	227	Y	Y	Y	Y	i0_HQ_C_c1900/f2p1/481	481	Y	Y	Y	Y
i0_HQ_N_c134088/f2p0/373	373	N	N	Y	Y	i0_HQ_C_c19001/f3p1/371	371	Y	Y	Y	Y
i0_HQ_N_c1341/f4p0/407	407	N	N	Y	Y	i0_HQ_C_c19003/f3p2/593	593	N	N	Y	Y
i0_HQ_N_c13412/f3p3/493	493	N	N	Y	Y	i0_HQ_C_c19005/f7p0/792	792	N	N	Y	Y
i0_HQ_N_c13413/f2p0/438	438	N	N	Y	Y	i0_HQ_C_c19006/f2p0/404	404	Y	N	Y	Y
i0_HQ_N_c13415/f11p2/540	540	N	N	N	Y	i0_HQ_C_c19007/f2p0/802	802	N	N	Y	Y
i0_HQ_N_c13426/f2p0/788	788	N	N	Y	Y	i0_HQ_C_c1901/f7p4/557	557	N	N	Y	Y
i0_HQ_N_c134355/f3p0/225	225	Y	Y	Y	Y	i0_HQ_C_c19010/f2p22/812	812	N	N	Y	Y
i0_HQ_N_c13439/f2p0/466	466	Y	Y	Y	Y	i0_HQ_C_c19012/f3p0/498	498	Y	Y	Y	Y
i0_HQ_N_c134475/f2p1/859	859	N	Y	N	Y	i0_HQ_C_c19018/f2p2/302	302	Y	Y	Y	Y
i0_HQ_N_c1345/f3p1/323	323	Y	Y	Y	Y	i0_HQ_C_c19019/f2p4/697	697	N	N	Y	Y
i0_HQ_N_c13451/f2p1/941	941	N	Y	Y	Y	i0_HQ_C_c19021/f2p3/561	561	Y	N	N	Y
i0_HQ_N_c13455/f2p0/673	673	N	N	N	Y	i0_HQ_C_c19022/f4p7/545	545	N	N	N	Y
i0_HQ_N_c13456/f2p3/468	468	N	N	N	Y	i0_HQ_C_c19023/f3p0/638	638	N	N	Y	Y
i0_HQ_N_c134585/f2p0/239	239	Y	Y	Y	Y	i0_HQ_C_c19025/f2p5/844	844	N	N	N	Y
i0_HQ_N_c1346/f3p0/389	389	Y	Y	Y	Y	i0_HQ_C_c19026/f2p2/998	998	N	N	N	Y
i0_HQ_N_c13460/f2p0/994	994	N	N	Y	N	i0_HQ_C_c19027/f2p2/378	378	Y	Y	Y	Y
i0_HQ_N_c13463/f4p7/620	620	N	N	Y	Y	i0_HQ_C_c19028/f2p0/274	274	Y	Y	Y	Y
i0_HQ_N_c13470/f2p0/459	459	N	Y	Y	Y	i0_HQ_C_c19029/f2p0/641	641	N	N	N	Y
i0_HQ_N_c13474/f2p0/659	659	N	N	Y	Y	i0_HQ_C_c1903/f3p3/614	614	Y	N	Y	Y
i0_HQ_N_c13475/f3p2/837	837	N	N	Y	N	i0_HQ_C_c19034/f2p18/465	465	N	N	Y	Y
i0_HQ_N_c134898/f2p0/213	213	Y	Y	Y	Y	i0_HQ_C_c19036/f3p3/975	975	N	N	N	Y
i0_HQ_N_c13494/f3p385/409	409	Y	N	Y	Y	i0_HQ_C_c19038/f3p14/467	467	N	N	Y	Y
i0_HQ_N_c134959/f2p7/306	306	Y	Y	Y	Y	i0_HQ_C_c1904/f2p4/764	764	Y	Y	Y	Y
i0_HQ_N_c135012/f2p0/215	215	Y	Y	Y	Y	i0_HQ_C_c19040/f2p5/665	665	Y	Y	Y	Y
i0_HQ_N_c13516/f4p2/425	425	Y	N	Y	Y	i0_HQ_C_c19041/f2p0/597	597	Y	N	Y	Y
i0_HQ_N_c135172/f2p0/209	209	Y	Y	Y	Y	i0_HQ_C_c19046/f2p0/517	517	N	N	Y	Y
i0_HQ_N_c13522/f2p0/663	663	N	Y	Y	Y	i0_HQ_C_c1905/f3p1/305	305	Y	Y	Y	Y
i0_HQ_N_c13523/f2p2/565	565	Y	N	Y	Y	i0_HQ_C_c19051/f2p0/312	312	N	Y	Y	Y
i0_HQ_N_c135295/f2p0/237	237	Y	Y	Y	Y	i0_HQ_C_c19052/f3p2/366	366	Y	Y	Y	Y
i0_HQ_N_c13531/f2p0/351	351	N	Y	Y	Y	i0_HQ_C_c19056/f3p1/901	901	N	N	Y	Y
i0_HQ_N_c13533/f3p2/702	702	N	N	Y	Y	i0_HQ_C_c19061/f2p31/839	839	N	N	N	Y
i0_HQ_N_c13547/f2p1/380	380	N	Y	N	Y	i0_HQ_C_c19064/f2p5/396	396	Y	N	Y	Y
i0_HQ_N_c135471/f2p0/239	239	Y	Y	Y	Y	i0_HQ_C_c19066/f2p5/510	510	N	Y	Y	Y
i0_HQ_N_c13550/f3p2/934	934	N	N	Y	Y	i0_HQ_C_c19068/f2p0/265	265	Y	Y	Y	Y
i0_HQ_N_c135568/f2p0/229	229	Y	Y	Y	Y	i0_HQ_C_c19069/f2p1/421	421	N	N	Y	Y
i0_HQ_N_c13558/f3p0/580	580	N	N	Y	Y	i0_HQ_C_c19073/f3p0/776	776	N	N	Y	N
i0_HQ_N_c135663/f2p0/220	220	Y	Y	Y	Y	i0_HQ_C_c19077/f3p0/706	706	N	N	Y	Y
i0_HQ_N_c13568/f2p0/407	407	Y	Y	N	Y	i0_HQ_C_c19081/f2p5/894	894	N	Y	Y	Y
i0_HQ_N_c13571/f2p2/993	993	N	N	N	Y	i0_HQ_C_c19082/f2p1/620	620	N	Y	Y	Y
i0_HQ_N_c13572/f2p26/336	336	Y	N	Y	Y	i0_HQ_C_c19083/f4p3/695	695	N	N	N	Y
i0_HQ_N_c13573/f4p2/611	611	N	N	N	Y	i0_HQ_C_c19084/f2p1/763	763	N	N	N	Y
i0_HQ_N_c13577/f4p2/953	953	N	N	Y	Y	i0_HQ_C_c19086/f7p4/565	565	N	Y	Y	Y
i0_HQ_N_c13585/f2p2/325	325	Y	Y	Y	Y	i0_HQ_C_c19087/f4p0/977	977	N	N	N	Y
i0_HQ_N_c136067/f13p3/707	707	Y	N	N	Y	i0_HQ_C_c19089/f2p1/339	339	Y	Y	Y	Y
i0_HQ_N_c136070/f19p6/854	854	N	N	Y	N	i0_HQ_C_c19090/f3p0/242	242	Y	Y	Y	Y
i0_HQ_N_c136073/f6p4/958	958	N	N	Y	Y	i0_HQ_C_c19091/f2p0/827	827	Y	Y	Y	N
i0_HQ_N_c136074/f7p4/378	378	Y	Y	Y	Y	i0_HQ_C_c19093/f2p4/615	615	N	N	N	Y
i0_HQ_N_c136077/f3p16/542	542	N	N	Y	Y	i0_HQ_C_c19094/f2p2/977	977	N	N	N	Y
i0_HQ_N_c136078/f3p2/441	441	Y	N	Y	Y	i0_HQ_C_c19095/f4p1/623	623	N	N	Y	Y
i0_HQ_N_c136080/f4p1/624	624	N	N	N	Y	i0_HQ_C_c19099/f2p0/346	346	Y	Y	Y	Y
i0_HQ_N_c136082/f6p13/930	930	N	N	Y	N	i0_HQ_C_c1910/f3p5/290	290	Y	N	Y	Y
i0_HQ_N_c136086/f5p2/297	297	N	Y	Y	Y	i0_HQ_C_c19100/f3p0/611	611	N	Y	Y	Y
i0_HQ_N_c136087/f4p2/604	604	N	N	N	Y	i0_HQ_C_c19102/f2p0/653	653	N	N	Y	Y
i0_HQ_N_c136089/f2p3/421	421	N	N	Y	Y	i0_HQ_C_c19103/f3p2/672	672	N	N	N	Y
i0_HQ_N_c136090/f2p3/426	426	Y	Y	Y	Y	i0_HQ_C_c19104/f3p65/533	533	N	N	N	Y
i0_HQ_N_c136091/f10p8/639	639	N	N	N	Y	i0_HQ_C_c19109/f2p17/503	503	Y	N	Y	Y
i0_HQ_N_c136092/f4p14/898	898	N	N	N	Y	i0_HQ_C_c1911/f2p0/564	564	N	N	Y	Y
i0_HQ_N_c136096/f2p12/669	669	N	N	N	Y	i0_HQ_C_c19110/f2p3/434	434	N	N	Y	Y
i0_HQ_N_c136097/f3p1/946	946	Y	N	Y	Y	i0_HQ_C_c19111/f2p3/381	381	Y	N	Y	Y
i0_HQ_N_c136098/f4p4/477	477	N	N	Y	Y	i0_HQ_C_c19113/f4p1/860	860	N	N	Y	N
i0_HQ_N_c136102/f4p5/539	539	Y	Y	Y	Y	i0_HQ_C_c19121/f2p3/525	525	N	N	Y	Y
i0_HQ_N_c136103/f5p0/684	684	N	N	N	Y	i0_HQ_C_c19125/f2p1/494	494	Y	Y	Y	Y
i0_HQ_N_c136104/f4p2/633	633	N	N	N	Y	i0_HQ_C_c19126/f2p1/485	485	N	Y	Y	Y
i0_HQ_N_c136107/f4p4/769	769	N	N	N	Y	i0_HQ_C_c19130/f2p0/254	254	Y	Y	Y	Y
i0_HQ_N_c136108/f2p49/380	380	Y	Y	Y	Y	i0_HQ_C_c19131/f4p1/911	911	N	N	N	Y
i0_HQ_N_c136110/f2p18/910	910	Y	Y	Y	Y	i0_HQ_C_c19132/f5p1/513	513	N	Y	Y	Y
i0_HQ_N_c136111/f3p0/211	211	Y	Y	Y	Y	i0_HQ_C_c19134/f4p2/994	994	N	N	N	Y
i0_HQ_N_c136113/f3p3/453	453	Y	N	Y	Y	i0_HQ_C_c19137/f2p2/827	827	N	N	Y	Y
i0_HQ_N_c136114/f3p4/488	488	Y	Y	Y	Y	i0_HQ_C_c19139/f3p12/484	484	N	N	Y	Y
i0_HQ_N_c136115/f4p5/570	570	N	N	N	Y	i0_HQ_C_c19142/f2p3/717	717	N	N	Y	N
i0_HQ_N_c136116/f11p3/556	556	N	N	N	Y	i0_HQ_C_c19143/f2p0/289	289	Y	N	Y	Y
i0_HQ_N_c136117/f2p29/786	786	N	N	N	Y	i0_HQ_C_c19144/f6p0/390	390	Y	N	Y	Y
i0_HQ_N_c136119/f9p0/635	635	N	N	Y	Y	i0_HQ_C_c19147/f2p2/384	384	Y	Y	Y	Y
i0_HQ_N_c136120/f6p7/600	600	Y	Y	Y	Y	i0_HQ_C_c19149/f2p3/386	386	N	Y	Y	Y
i0_HQ_N_c136121/f18p4/704	704	N	N	N	Y	i0_HQ_C_c1915/f3p1/777	777	N	N	N	Y
i0_HQ_N_c136122/f4p7/828	828	N	N	N	Y	i0_HQ_C_c19150/f2p3/725	725	N	N	Y	Y
i0_HQ_N_c136124/f4p13/628	628	N	N	Y	Y	i0_HQ_C_c19151/f4p1/819	819	N	N	N	Y
i0_HQ_N_c136125/f23p6/521	521	N	N	Y	Y	i0_HQ_C_c19152/f2p1/670	670	N	Y	Y	Y
i0_HQ_N_c136126/f3p6/601	601	N	N	N	Y	i0_HQ_C_c19154/f2p6/359	359	Y	Y	Y	Y
i0_HQ_N_c136131/f2p1/706	706	N	N	Y	Y	i0_HQ_C_c19155/f3p0/820	820	N	Y	Y	Y
i0_HQ_N_c136133/f39p16/826	826	N	Y	Y	Y	i0_HQ_C_c19158/f2p10/576	576	N	N	Y	Y
i0_HQ_N_c136135/f3p10/510	510	N	N	Y	Y	i0_HQ_C_c19160/f2p0/287	287	Y	Y	Y	Y
i0_HQ_N_c136141/f5p0/225	225	Y	Y	Y	Y	i0_HQ_C_c19162/f2p0/710	710	N	N	Y	Y
i0_HQ_N_c136143/f3p1/693	693	N	N	Y	Y	i0_HQ_C_c19164/f2p1/928	928	N	N	Y	N
i0_HQ_N_c136147/f5p26/708	708	N	N	Y	Y	i0_HQ_C_c19165/f5p1/474	474	N	N	Y	Y
i0_HQ_N_c136150/f2p0/223	223	Y	Y	Y	Y	i0_HQ_C_c19169/f2p4/698	698	N	N	N	Y
i0_HQ_N_c136153/f2p0/226	226	Y	Y	Y	Y	i0_HQ_C_c19170/f2p1/731	731	N	N	N	Y
i0_HQ_N_c136155/f17p0/963	963	N	N	N	Y	i0_HQ_C_c19173/f2p7/801	801	N	N	N	Y
i0_HQ_N_c136156/f2p14/658	658	N	N	Y	Y	i0_HQ_C_c19178/f2p45/440	440	Y	N	Y	Y
i0_HQ_N_c136161/f2p0/264	264	Y	Y	Y	Y	i0_HQ_C_c19179/f4p8/424	424	N	N	Y	Y
i0_HQ_N_c136163/f3p0/740	740	N	N	Y	Y	i0_HQ_C_c19181/f2p8/877	877	N	N	Y	N
i0_HQ_N_c136164/f3p25/882	882	N	N	N	Y	i0_HQ_C_c19183/f3p0/402	402	Y	Y	Y	Y
i0_HQ_N_c136166/f3p11/376	376	N	N	Y	Y	i0_HQ_C_c19185/f3p1/321	321	Y	Y	Y	Y
i0_HQ_N_c136170/f2p0/467	467	Y	Y	Y	Y	i0_HQ_C_c19187/f2p0/272	272	Y	Y	Y	Y
i0_HQ_N_c136182/f45p9/885	885	N	N	N	Y	i0_HQ_C_c19188/f4p13/434	434	N	N	N	Y
i0_HQ_N_c136183/f41p9/469	469	Y	N	N	Y	i0_HQ_C_c19189/f3p0/582	582	N	Y	Y	Y
i0_HQ_N_c136193/f11p6/719	719	N	N	N	Y	i0_HQ_C_c19190/f2p1/764	764	N	N	Y	Y
i0_HQ_N_c136199/f5p4/537	537	N	N	Y	Y	i0_HQ_C_c19195/f2p0/497	497	Y	Y	Y	Y
i0_HQ_N_c136200/f4p8/470	470	Y	N	Y	Y	i0_HQ_C_c19197/f3p0/246	246	Y	Y	Y	Y
i0_HQ_N_c136204/f2p0/534	534	Y	Y	Y	Y	i0_HQ_C_c19199/f3p2/427	427	Y	Y	Y	Y
i0_HQ_N_c136205/f2p5/675	675	N	N	N	Y	i0_HQ_C_c1920/f2p1/521	521	N	Y	Y	Y
i0_HQ_N_c136206/f4p4/325	325	Y	Y	Y	Y	i0_HQ_C_c19200/f2p1/583	583	N	N	N	Y
i0_HQ_N_c13621/f2p0/490	490	N	Y	Y	Y	i0_HQ_C_c19204/f2p74/989	989	N	N	Y	Y
i0_HQ_N_c136210/f4p11/993	993	Y	N	N	Y	i0_HQ_C_c19206/f2p9/381	381	Y	Y	Y	Y
i0_HQ_N_c136213/f33p9/755	755	N	N	N	Y	i0_HQ_C_c19207/f2p0/687	687	Y	N	N	Y
i0_HQ_N_c136218/f3p2/482	482	Y	N	Y	Y	i0_HQ_C_c1921/f2p21/355	355	Y	Y	Y	Y
i0_HQ_N_c136219/f5p0/255	255	Y	Y	Y	Y	i0_HQ_C_c19211/f2p5/645	645	N	N	Y	Y
i0_HQ_N_c13622/f2p0/854	854	N	Y	Y	Y	i0_HQ_C_c19212/f2p5/569	569	Y	N	Y	Y
i0_HQ_N_c136221/f3p7/554	554	N	N	N	Y	i0_HQ_C_c19213/f4p3/479	479	N	N	N	Y
i0_HQ_N_c136224/f3p0/601	601	N	Y	Y	Y	i0_HQ_C_c19215/f2p1/461	461	N	N	Y	Y
i0_HQ_N_c136228/f2p7/857	857	Y	Y	Y	Y	i0_HQ_C_c19216/f4p10/669	669	Y	N	Y	Y
i0_HQ_N_c136229/f2p5/875	875	N	N	N	Y	i0_HQ_C_c19217/f3p5/949	949	N	N	Y	N
i0_HQ_N_c136230/f61p9/660	660	N	N	Y	Y	i0_HQ_C_c19218/f3p14/602	602	Y	N	Y	Y
i0_HQ_N_c136241/f11p0/246	246	Y	Y	Y	Y	i0_HQ_C_c19219/f2p0/255	255	Y	Y	Y	Y
i0_HQ_N_c136243/f4p8/629	629	N	N	Y	Y	i0_HQ_C_c1922/f4p1/927	927	N	N	N	Y
i0_HQ_N_c136249/f10p24/1003	1003	Y	N	Y	N	i0_HQ_C_c19222/f2p0/273	273	Y	Y	Y	Y
i0_HQ_N_c136251/f4p1/342	342	Y	Y	Y	Y	i0_HQ_C_c19227/f2p0/814	814	N	N	Y	Y
i0_HQ_N_c136252/f7p0/244	244	Y	Y	Y	Y	i0_HQ_C_c19228/f2p2/598	598	N	N	N	Y
i0_HQ_N_c136254/f4p6/759	759	N	N	N	Y	i0_HQ_C_c1923/f4p1/608	608	N	N	Y	Y
i0_HQ_N_c136256/f3p1/313	313	Y	Y	Y	Y	i0_HQ_C_c19230/f2p0/296	296	Y	Y	Y	Y
i0_HQ_N_c136263/f111p10/692	692	N	N	Y	Y	i0_HQ_C_c19231/f2p1/651	651	N	N	Y	Y
i0_HQ_N_c136266/f30p2/873	873	N	N	Y	Y	i0_HQ_C_c19232/f4p1/894	894	N	N	N	Y
i0_HQ_N_c136271/f2p6/378	378	N	N	Y	Y	i0_HQ_C_c19235/f4p6/626	626	N	N	Y	Y
i0_HQ_N_c136274/f57p4/645	645	N	Y	Y	Y	i0_HQ_C_c19236/f2p1/760	760	N	N	N	Y
i0_HQ_N_c136275/f3p0/406	406	N	N	Y	Y	i0_HQ_C_c19239/f2p0/253	253	Y	Y	Y	Y
i0_HQ_N_c136285/f2p0/239	239	Y	Y	Y	Y	i0_HQ_C_c1924/f5p1/700	700	N	N	Y	Y
i0_HQ_N_c136287/f15p3/601	601	N	N	Y	Y	i0_HQ_C_c19240/f2p3/452	452	Y	N	Y	Y
i0_HQ_N_c136291/f3p3/532	532	N	Y	Y	Y	i0_HQ_C_c19241/f4p5/958	958	N	N	N	Y
i0_HQ_N_c136293/f4p1/759	759	N	N	Y	N	i0_HQ_C_c19242/f3p11/592	592	N	N	Y	Y
i0_HQ_N_c136301/f12p0/271	271	N	N	Y	Y	i0_HQ_C_c19245/f2p0/256	256	Y	Y	Y	Y
i0_HQ_N_c136306/f20p14/325	325	Y	Y	Y	Y	i0_HQ_C_c19246/f3p46/402	402	Y	Y	Y	Y
i0_HQ_N_c136308/f14p0/553	553	N	N	Y	Y	i0_HQ_C_c19247/f2p1/687	687	Y	Y	Y	Y
i0_HQ_N_c136309/f9p0/258	258	Y	Y	Y	Y	i0_HQ_C_c19248/f2p3/342	342	Y	Y	Y	Y
i0_HQ_N_c136312/f12p11/509	509	N	N	Y	Y	i0_HQ_C_c19250/f2p0/558	558	Y	N	Y	Y
i0_HQ_N_c136315/f11p5/602	602	N	N	Y	Y	i0_HQ_C_c19251/f2p11/455	455	Y	Y	Y	Y
i0_HQ_N_c136316/f77p10/366	366	N	N	Y	Y	i0_HQ_C_c19252/f3p2/548	548	N	N	Y	Y
i0_HQ_N_c136319/f24p20/437	437	Y	Y	Y	Y	i0_HQ_C_c19253/f2p0/677	677	N	N	N	Y
i0_HQ_N_c136323/f10p21/596	596	N	N	N	Y	i0_HQ_C_c19257/f3p6/586	586	N	N	N	Y
i0_HQ_N_c136333/f14p7/409	409	N	N	Y	Y	i0_HQ_C_c19258/f2p12/505	505	Y	Y	Y	Y
i0_HQ_N_c136335/f5p4/975	975	N	N	Y	Y	i0_HQ_C_c19259/f2p1/721	721	N	N	Y	Y
i0_HQ_N_c136337/f4p1/511	511	N	N	Y	Y	i0_HQ_C_c19263/f7p5/945	945	N	N	N	Y
i0_HQ_N_c136340/f5p2/307	307	Y	Y	Y	Y	i0_HQ_C_c19267/f2p1/664	664	N	N	N	Y
i0_HQ_N_c136342/f2p4/539	539	N	Y	Y	Y	i0_HQ_C_c1927/f6p1/377	377	Y	N	Y	Y
i0_HQ_N_c136344/f3p20/555	555	Y	N	Y	Y	i0_HQ_C_c19271/f2p1/646	646	N	N	N	Y
i0_HQ_N_c136346/f2p1/316	316	Y	N	Y	Y	i0_HQ_C_c19276/f2p3/547	547	N	N	Y	Y
i0_HQ_N_c13635/f2p0/566	566	N	Y	Y	Y	i0_HQ_C_c19280/f2p2/329	329	N	N	Y	Y
i0_HQ_N_c136350/f13p3/912	912	N	N	Y	Y	i0_HQ_C_c19281/f4p0/644	644	N	N	Y	Y
i0_HQ_N_c136351/f10p3/904	904	Y	N	Y	Y	i0_HQ_C_c19287/f5p12/966	966	N	N	N	Y
i0_HQ_N_c136352/f2p7/904	904	N	N	Y	N	i0_HQ_C_c19289/f2p1/910	910	N	N	Y	Y
i0_HQ_N_c136355/f2p0/549	549	N	N	N	Y	i0_HQ_C_c1929/f4p1/668	668	N	Y	N	Y
i0_HQ_N_c136358/f5p0/239	239	Y	N	Y	Y	i0_HQ_C_c19290/f2p16/709	709	N	N	N	Y
i0_HQ_N_c136359/f11p6/923	923	N	N	N	Y	i0_HQ_C_c19291/f2p0/448	448	Y	Y	Y	Y
i0_HQ_N_c136361/f4p19/528	528	Y	N	N	Y	i0_HQ_C_c19293/f2p1/537	537	Y	Y	Y	Y
i0_HQ_N_c136365/f2p3/797	797	N	N	N	Y	i0_HQ_C_c19295/f2p1/832	832	Y	N	N	Y
i0_HQ_N_c136366/f2p3/507	507	N	Y	Y	Y	i0_HQ_C_c19296/f5p3/905	905	N	N	N	Y
i0_HQ_N_c136385/f3p4/903	903	N	N	Y	N	i0_HQ_C_c19298/f2p0/820	820	N	N	N	Y
i0_HQ_N_c136392/f5p22/710	710	N	N	N	Y	i0_HQ_C_c19299/f2p0/270	270	Y	Y	Y	Y
i0_HQ_N_c136393/f3p3/574	574	N	N	N	Y	i0_HQ_C_c19300/f2p0/657	657	N	N	Y	Y
i0_HQ_N_c136396/f2p0/301	301	Y	Y	Y	Y	i0_HQ_C_c19302/f3p1/841	841	N	N	Y	Y
i0_HQ_N_c136402/f2p12/382	382	Y	N	Y	Y	i0_HQ_C_c19303/f2p0/464	464	Y	Y	Y	Y
i0_HQ_N_c136404/f6p1/848	848	N	N	N	Y	i0_HQ_C_c19304/f2p0/378	378	Y	Y	Y	Y
i0_HQ_N_c136409/f2p2/660	660	N	N	Y	Y	i0_HQ_C_c19306/f3p1/672	672	Y	Y	Y	Y
i0_HQ_N_c136418/f11p0/921	921	N	N	Y	Y	i0_HQ_C_c19309/f2p1/865	865	Y	N	N	Y
i0_HQ_N_c136419/f2p9/702	702	N	N	Y	Y	i0_HQ_C_c19311/f2p3/633	633	N	Y	Y	Y
i0_HQ_N_c136422/f8p5/642	642	N	N	N	Y	i0_HQ_C_c19312/f3p0/949	949	N	N	N	Y
i0_HQ_N_c136434/f15p0/251	251	Y	Y	Y	Y	i0_HQ_C_c19313/f2p13/897	897	N	N	Y	Y
i0_HQ_N_c136435/f3p3/678	678	N	Y	N	Y	i0_HQ_C_c19316/f2p0/255	255	Y	Y	Y	Y
i0_HQ_N_c136436/f37p7/929	929	N	N	N	Y	i0_HQ_C_c19317/f2p3/532	532	Y	N	Y	Y
i0_HQ_N_c136437/f13p2/305	305	Y	Y	Y	Y	i0_HQ_C_c19318/f3p5/629	629	N	N	N	Y
i0_HQ_N_c13644/f2p4/848	848	Y	N	Y	Y	i0_HQ_C_c19320/f5p6/659	659	N	N	Y	Y
i0_HQ_N_c136440/f14p10/697	697	N	N	Y	N	i0_HQ_C_c19322/f4p1/843	843	N	N	N	Y
i0_HQ_N_c136443/f4p1/482	482	N	Y	Y	Y	i0_HQ_C_c19324/f2p3/824	824	N	N	Y	N
i0_HQ_N_c136448/f23p50/956	956	N	N	N	Y	i0_HQ_C_c19325/f2p2/444	444	Y	N	Y	Y
i0_HQ_N_c136452/f18p5/443	443	N	N	Y	Y	i0_HQ_C_c19326/f3p4/387	387	N	N	Y	Y
i0_HQ_N_c136458/f15p8/823	823	N	N	Y	N	i0_HQ_C_c19329/f2p7/748	748	N	N	Y	Y
i0_HQ_N_c136463/f13p8/317	317	Y	Y	Y	Y	i0_HQ_C_c19330/f2p18/732	732	Y	Y	Y	Y
i0_HQ_N_c13647/f3p7/913	913	N	N	N	Y	i0_HQ_C_c19332/f2p0/434	434	Y	Y	Y	Y
i0_HQ_N_c13648/f2p1/535	535	Y	Y	Y	Y	i0_HQ_C_c19333/f2p0/804	804	N	N	N	Y
i0_HQ_N_c136485/f4p0/218	218	Y	Y	Y	Y	i0_HQ_C_c19334/f2p18/927	927	N	N	N	Y
i0_HQ_N_c136493/f2p1/383	383	Y	Y	Y	Y	i0_HQ_C_c19336/f2p0/708	708	N	N	N	Y
i0_HQ_N_c136495/f9p6/764	764	N	N	Y	N	i0_HQ_C_c19337/f3p3/496	496	Y	N	Y	Y
i0_HQ_N_c136504/f13p2/499	499	N	N	Y	Y	i0_HQ_C_c19339/f3p1/954	954	N	Y	Y	Y
i0_HQ_N_c136505/f2p5/575	575	N	N	Y	Y	i0_HQ_C_c19340/f4p0/544	544	Y	Y	Y	Y
i0_HQ_N_c136506/f4p410/418	418	Y	Y	Y	Y	i0_HQ_C_c19344/f2p0/953	953	N	N	Y	Y
i0_HQ_N_c136507/f3p0/237	237	Y	Y	Y	Y	i0_HQ_C_c19345/f3p3/894	894	N	N	Y	N
i0_HQ_N_c136508/f11p7/565	565	N	N	Y	Y	i0_HQ_C_c19346/f2p0/301	301	Y	Y	Y	Y
i0_HQ_N_c136516/f13p15/361	361	Y	Y	Y	Y	i0_HQ_C_c19348/f4p1/341	341	Y	Y	Y	Y
i0_HQ_N_c136518/f48p12/338	338	Y	Y	Y	Y	i0_HQ_C_c1935/f3p9/461	461	Y	N	Y	Y
i0_HQ_N_c136522/f19p0/243	243	Y	Y	Y	Y	i0_HQ_C_c19350/f2p3/765	765	Y	N	Y	Y
i0_HQ_N_c136523/f23p2/343	343	N	N	Y	Y	i0_HQ_C_c19351/f2p5/443	443	Y	Y	Y	Y
i0_HQ_N_c136525/f2p2/737	737	N	Y	Y	Y	i0_HQ_C_c19352/f2p2/540	540	N	N	N	Y
i0_HQ_N_c136528/f10p0/216	216	Y	Y	Y	Y	i0_HQ_C_c19354/f5p9/426	426	Y	Y	Y	Y
i0_HQ_N_c136529/f15p2/337	337	Y	Y	Y	Y	i0_HQ_C_c19358/f2p2/495	495	Y	Y	Y	Y
i0_HQ_N_c136531/f12p11/715	715	Y	N	N	Y	i0_HQ_C_c1936/f4p1/658	658	N	N	Y	Y
i0_HQ_N_c136541/f18p1/379	379	N	Y	Y	Y	i0_HQ_C_c19363/f3p2/506	506	N	N	Y	Y
i0_HQ_N_c136545/f2p0/250	250	Y	Y	Y	Y	i0_HQ_C_c19365/f3p5/334	334	N	Y	Y	Y
i0_HQ_N_c136547/f13p1/594	594	N	N	Y	Y	i0_HQ_C_c19369/f2p16/397	397	Y	N	Y	Y
i0_HQ_N_c136552/f11p1/557	557	N	N	N	Y	i0_HQ_C_c1937/f3p0/284	284	Y	Y	Y	Y
i0_HQ_N_c136554/f15p37/426	426	N	N	Y	Y	i0_HQ_C_c19370/f2p0/808	808	N	N	Y	Y
i0_HQ_N_c136556/f14p6/676	676	N	N	N	Y	i0_HQ_C_c19371/f2p8/622	622	Y	N	Y	Y
i0_HQ_N_c136557/f8p0/229	229	Y	Y	Y	Y	i0_HQ_C_c19375/f2p17/808	808	N	N	N	Y
i0_HQ_N_c136560/f7p4/518	518	N	N	Y	Y	i0_HQ_C_c19377/f2p404/934	934	N	N	Y	N
i0_HQ_N_c136563/f24p12/413	413	N	N	Y	Y	i0_HQ_C_c19378/f3p0/551	551	Y	N	Y	Y
i0_HQ_N_c136564/f18p45/310	310	Y	Y	Y	Y	i0_HQ_C_c1938/f5p4/971	971	N	N	Y	Y
i0_HQ_N_c136565/f13p0/440	440	Y	Y	Y	Y	i0_HQ_C_c19380/f3p2/817	817	N	N	N	Y
i0_HQ_N_c136566/f5p0/232	232	Y	Y	Y	Y	i0_HQ_C_c19382/f2p6/324	324	N	N	Y	Y
i0_HQ_N_c136567/f3p7/758	758	N	N	Y	Y	i0_HQ_C_c19387/f2p0/975	975	Y	N	N	Y
i0_HQ_N_c136568/f11p2/499	499	N	N	Y	Y	i0_HQ_C_c19388/f2p3/982	982	N	N	Y	N
i0_HQ_N_c136569/f11p7/779	779	N	N	Y	Y	i0_HQ_C_c19389/f4p1/590	590	N	Y	Y	Y
i0_HQ_N_c136570/f18p3/550	550	N	N	Y	Y	i0_HQ_C_c19391/f2p2/415	415	Y	Y	Y	Y
i0_HQ_N_c136571/f11p13/706	706	N	N	Y	Y	i0_HQ_C_c19392/f2p1/519	519	Y	N	N	Y
i0_HQ_N_c136572/f11p9/754	754	N	N	N	Y	i0_HQ_C_c19394/f2p6/712	712	N	N	Y	Y
i0_HQ_N_c136573/f12p7/769	769	N	N	Y	N	i0_HQ_C_c19395/f5p3/311	311	N	N	Y	Y
i0_HQ_N_c136575/f17p5/399	399	Y	Y	Y	Y	i0_HQ_C_c19396/f2p0/551	551	N	Y	Y	Y
i0_HQ_N_c136576/f4p4/923	923	N	N	Y	Y	i0_HQ_C_c19401/f2p3/305	305	Y	Y	Y	Y
i0_HQ_N_c136577/f4p24/518	518	Y	Y	Y	Y	i0_HQ_C_c19402/f2p1/706	706	Y	Y	Y	Y
i0_HQ_N_c136579/f2p12/794	794	N	N	Y	Y	i0_HQ_C_c19406/f2p21/372	372	Y	Y	Y	Y
i0_HQ_N_c136580/f2p6/730	730	N	N	N	Y	i0_HQ_C_c19408/f2p6/389	389	Y	Y	Y	Y
i0_HQ_N_c136581/f8p5/701	701	N	N	Y	Y	i0_HQ_C_c1941/f9p1/905	905	N	Y	Y	Y
i0_HQ_N_c136582/f5p9/821	821	N	N	N	Y	i0_HQ_C_c19412/f7p3/430	430	N	N	Y	Y
i0_HQ_N_c136584/f2p8/504	504	N	N	Y	Y	i0_HQ_C_c19415/f3p2/810	810	N	N	Y	Y
i0_HQ_N_c136586/f6p3/317	317	N	N	Y	Y	i0_HQ_C_c19418/f3p2/431	431	N	N	Y	Y
i0_HQ_N_c136587/f10p3/722	722	N	N	N	Y	i0_HQ_C_c19419/f3p0/282	282	Y	Y	Y	Y
i0_HQ_N_c136588/f2p8/397	397	Y	Y	Y	Y	i0_HQ_C_c1942/f2p1/534	534	N	N	Y	Y
i0_HQ_N_c136592/f2p1/459	459	N	Y	Y	Y	i0_HQ_C_c19421/f4p0/1001	1001	N	N	Y	Y
i0_HQ_N_c136594/f3p0/291	291	Y	Y	Y	Y	i0_HQ_C_c19422/f2p3/764	764	N	N	N	Y
i0_HQ_N_c136595/f2p3/331	331	Y	Y	Y	Y	i0_HQ_C_c19424/f2p0/537	537	Y	Y	Y	Y
i0_HQ_N_c136597/f6p0/958	958	N	N	N	Y	i0_HQ_C_c19425/f3p1/521	521	N	N	Y	Y
i0_HQ_N_c136598/f3p4/431	431	N	N	N	Y	i0_HQ_C_c19427/f2p0/351	351	Y	Y	Y	Y
i0_HQ_N_c136599/f2p0/846	846	N	N	N	Y	i0_HQ_C_c19428/f2p0/380	380	Y	Y	Y	Y
i0_HQ_N_c136600/f4p6/444	444	N	Y	Y	Y	i0_HQ_C_c19429/f5p0/583	583	Y	N	Y	Y
i0_HQ_N_c136601/f2p7/562	562	N	N	Y	Y	i0_HQ_C_c1943/f3p4/470	470	Y	Y	Y	Y
i0_HQ_N_c136602/f5p3/582	582	N	N	Y	Y	i0_HQ_C_c19430/f2p2/664	664	N	N	N	Y
i0_HQ_N_c136603/f2p21/907	907	N	N	N	Y	i0_HQ_C_c19431/f2p10/730	730	Y	Y	Y	Y
i0_HQ_N_c136606/f2p31/455	455	Y	N	Y	Y	i0_HQ_C_c19432/f2p7/375	375	Y	Y	Y	Y
i0_HQ_N_c136609/f4p3/458	458	N	N	Y	Y	i0_HQ_C_c19433/f3p1/972	972	N	N	Y	N
i0_HQ_N_c136610/f4p2/619	619	Y	N	N	Y	i0_HQ_C_c19435/f2p3/598	598	Y	Y	Y	Y
i0_HQ_N_c136613/f11p2/474	474	N	N	N	Y	i0_HQ_C_c19436/f2p8/893	893	N	N	N	Y
i0_HQ_N_c136614/f2p0/451	451	Y	Y	Y	Y	i0_HQ_C_c19438/f4p12/473	473	N	N	Y	Y
i0_HQ_N_c136616/f3p22/383	383	Y	Y	Y	Y	i0_HQ_C_c19443/f2p1/1000	1000	N	N	Y	N
i0_HQ_N_c136618/f2p3/872	872	N	Y	Y	Y	i0_HQ_C_c19444/f2p1/366	366	Y	Y	Y	Y
i0_HQ_N_c136619/f11p2/767	767	N	N	N	Y	i0_HQ_C_c19445/f2p2/558	558	N	N	Y	Y
i0_HQ_N_c136620/f5p6/781	781	N	Y	Y	Y	i0_HQ_C_c19446/f2p2/584	584	N	N	N	Y
i0_HQ_N_c136621/f3p2/382	382	Y	Y	Y	Y	i0_HQ_C_c1945/f5p4/639	639	N	N	Y	Y
i0_HQ_N_c136622/f2p1/531	531	N	N	Y	Y	i0_HQ_C_c19450/f2p0/1001	1001	N	N	N	Y
i0_HQ_N_c136623/f2p3/594	594	N	N	Y	Y	i0_HQ_C_c19452/f2p1/808	808	Y	N	N	Y
i0_HQ_N_c136624/f5p1/886	886	N	N	Y	Y	i0_HQ_C_c19454/f2p0/254	254	Y	Y	Y	Y
i0_HQ_N_c136625/f6p1/313	313	Y	Y	Y	Y	i0_HQ_C_c19456/f2p1/810	810	N	N	Y	Y
i0_HQ_N_c136626/f6p7/609	609	N	N	Y	Y	i0_HQ_C_c19457/f3p1/826	826	N	N	N	Y
i0_HQ_N_c136628/f4p1/562	562	Y	N	N	Y	i0_HQ_C_c19467/f2p0/458	458	N	Y	Y	Y
i0_HQ_N_c136629/f4p4/865	865	N	N	Y	Y	i0_HQ_C_c1947/f2p0/546	546	N	N	N	Y
i0_HQ_N_c136630/f5p2/300	300	Y	Y	Y	Y	i0_HQ_C_c19470/f2p2/402	402	Y	Y	Y	Y
i0_HQ_N_c136633/f3p3/547	547	Y	Y	Y	Y	i0_HQ_C_c19471/f8p20/747	747	N	Y	Y	Y
i0_HQ_N_c136634/f2p0/508	508	N	N	Y	Y	i0_HQ_C_c19472/f3p2/304	304	Y	Y	Y	Y
i0_HQ_N_c136635/f2p0/772	772	Y	Y	Y	Y	i0_HQ_C_c19473/f3p3/648	648	N	N	N	Y
i0_HQ_N_c136638/f4p8/575	575	N	N	N	Y	i0_HQ_C_c19476/f4p13/383	383	N	N	Y	Y
i0_HQ_N_c136640/f4p0/272	272	Y	Y	Y	Y	i0_HQ_C_c19478/f2p1/378	378	Y	Y	Y	Y
i0_HQ_N_c136641/f7p0/238	238	Y	Y	Y	Y	i0_HQ_C_c19479/f4p4/620	620	Y	N	Y	Y
i0_HQ_N_c136642/f2p33/520	520	N	N	Y	Y	i0_HQ_C_c19481/f2p1/926	926	N	N	N	Y
i0_HQ_N_c136644/f3p7/635	635	N	N	N	Y	i0_HQ_C_c19486/f2p0/669	669	Y	Y	Y	Y
i0_HQ_N_c136645/f11p2/624	624	N	N	Y	Y	i0_HQ_C_c19487/f4p4/891	891	N	N	N	Y
i0_HQ_N_c136646/f2p0/494	494	N	Y	Y	Y	i0_HQ_C_c19488/f2p0/851	851	N	N	Y	Y
i0_HQ_N_c136649/f3p7/523	523	N	N	Y	Y	i0_HQ_C_c19492/f5p9/594	594	N	N	N	Y
i0_HQ_N_c136650/f10p0/608	608	N	N	Y	Y	i0_HQ_C_c19493/f3p10/758	758	N	N	Y	Y
i0_HQ_N_c136652/f3p3/303	303	Y	Y	Y	Y	i0_HQ_C_c19494/f2p0/257	257	N	Y	Y	Y
i0_HQ_N_c136653/f3p17/493	493	Y	Y	Y	Y	i0_HQ_C_c19495/f3p0/243	243	Y	Y	Y	Y
i0_HQ_N_c136654/f5p3/689	689	N	N	Y	Y	i0_HQ_C_c19497/f2p0/668	668	Y	N	N	Y
i0_HQ_N_c136655/f14p3/639	639	N	N	Y	Y	i0_HQ_C_c19498/f3p1/702	702	N	N	N	Y
i0_HQ_N_c136658/f2p0/549	549	N	N	Y	Y	i0_HQ_C_c1950/f2p0/331	331	Y	Y	Y	Y
i0_HQ_N_c136659/f5p4/292	292	Y	Y	Y	Y	i0_HQ_C_c19504/f2p0/238	238	Y	Y	Y	Y
i0_HQ_N_c136662/f6p4/719	719	N	N	N	Y	i0_HQ_C_c19508/f2p2/964	964	N	N	Y	Y
i0_HQ_N_c136663/f10p0/906	906	N	Y	Y	Y	i0_HQ_C_c19511/f2p2/619	619	N	N	Y	Y
i0_HQ_N_c136664/f2p23/675	675	N	N	Y	Y	i0_HQ_C_c19512/f2p8/555	555	N	N	Y	Y
i0_HQ_N_c136665/f5p0/387	387	Y	Y	Y	Y	i0_HQ_C_c19513/f2p0/465	465	N	N	Y	Y
i0_HQ_N_c136666/f3p0/495	495	N	N	Y	Y	i0_HQ_C_c19514/f2p4/469	469	N	Y	Y	Y
i0_HQ_N_c136668/f4p6/490	490	N	N	Y	Y	i0_HQ_C_c19517/f2p2/449	449	Y	N	Y	Y
i0_HQ_N_c136669/f4p10/359	359	N	N	Y	Y	i0_HQ_C_c19520/f3p0/286	286	Y	Y	Y	Y
i0_HQ_N_c13667/f2p1/645	645	N	N	N	Y	i0_HQ_C_c19523/f2p2/893	893	N	N	Y	N
i0_HQ_N_c136671/f12p0/259	259	Y	Y	Y	Y	i0_HQ_C_c19527/f2p1/791	791	N	N	Y	Y
i0_HQ_N_c136676/f6p1/699	699	N	N	N	Y	i0_HQ_C_c1953/f2p1/344	344	Y	N	Y	Y
i0_HQ_N_c136677/f3p0/959	959	N	N	Y	Y	i0_HQ_C_c19532/f2p0/281	281	Y	Y	Y	Y
i0_HQ_N_c136678/f14p0/682	682	N	N	Y	Y	i0_HQ_C_c1954/f2p18/474	474	Y	Y	Y	Y
i0_HQ_N_c136679/f2p0/305	305	Y	Y	Y	Y	i0_HQ_C_c19541/f3p1/742	742	N	Y	Y	Y
i0_HQ_N_c13668/f5p1/495	495	N	N	Y	Y	i0_HQ_C_c1957/f2p0/722	722	N	Y	Y	Y
i0_HQ_N_c136681/f34p7/947	947	N	N	Y	Y	i0_HQ_C_c19572/f2p1/385	385	N	N	Y	Y
i0_HQ_N_c136682/f2p20/489	489	N	N	Y	Y	i0_HQ_C_c19583/f3p2/388	388	N	N	N	Y
i0_HQ_N_c136683/f3p2/309	309	Y	Y	Y	Y	i0_HQ_C_c1959/f4p9/782	782	N	N	N	Y
i0_HQ_N_c136684/f11p17/515	515	N	N	Y	Y	i0_HQ_C_c19592/f2p1/829	829	N	N	N	Y
i0_HQ_N_c136685/f2p1/338	338	Y	Y	Y	Y	i0_HQ_C_c1960/f4p2/651	651	N	N	Y	Y
i0_HQ_N_c136686/f2p7/732	732	N	N	N	Y	i0_HQ_C_c19604/f2p1/387	387	N	N	Y	Y
i0_HQ_N_c136688/f3p1/641	641	N	N	N	Y	i0_HQ_C_c1964/f4p1/908	908	N	N	N	Y
i0_HQ_N_c136691/f2p29/471	471	Y	N	Y	Y	i0_HQ_C_c19641/f2p2/793	793	N	N	Y	Y
i0_HQ_N_c136692/f17p12/492	492	N	N	Y	Y	i0_HQ_C_c1965/f2p0/870	870	N	N	N	Y
i0_HQ_N_c136693/f2p0/595	595	N	N	Y	Y	i0_HQ_C_c19653/f2p1/718	718	N	N	Y	Y
i0_HQ_N_c136695/f3p0/451	451	Y	Y	Y	Y	i0_HQ_C_c19655/f2p4/872	872	N	N	N	Y
i0_HQ_N_c136700/f2p19/537	537	N	N	N	Y	i0_HQ_C_c19657/f2p3/587	587	N	N	Y	Y
i0_HQ_N_c136702/f2p1/321	321	Y	Y	Y	Y	i0_HQ_C_c1966/f2p3/546	546	N	N	Y	Y
i0_HQ_N_c136703/f4p0/612	612	N	N	Y	Y	i0_HQ_C_c1967/f4p1/503	503	N	N	Y	Y
i0_HQ_N_c136704/f2p2/694	694	N	N	N	Y	i0_HQ_C_c1968/f2p16/333	333	Y	N	Y	Y
i0_HQ_N_c136705/f2p17/399	399	Y	N	N	Y	i0_HQ_C_c19683/f2p7/498	498	Y	Y	Y	Y
i0_HQ_N_c136708/f2p7/545	545	Y	Y	Y	Y	i0_HQ_C_c19684/f3p1/530	530	N	N	Y	Y
i0_HQ_N_c136710/f5p0/547	547	Y	Y	Y	Y	i0_HQ_C_c1969/f2p4/502	502	Y	Y	Y	Y
i0_HQ_N_c136711/f3p3/535	535	Y	Y	Y	Y	i0_HQ_C_c19702/f3p13/845	845	N	N	N	Y
i0_HQ_N_c136713/f6p11/536	536	Y	N	N	Y	i0_HQ_C_c19718/f2p257/665	665	N	Y	Y	Y
i0_HQ_N_c136716/f2p0/633	633	N	N	N	Y	i0_HQ_C_c1972/f3p1/972	972	N	N	Y	Y
i0_HQ_N_c136719/f4p0/878	878	N	N	Y	Y	i0_HQ_C_c19730/f5p1/708	708	N	N	N	Y
i0_HQ_N_c136721/f4p0/469	469	Y	N	Y	Y	i0_HQ_C_c19740/f2p1/434	434	Y	Y	Y	Y
i0_HQ_N_c136722/f10p0/712	712	N	N	N	Y	i0_HQ_C_c19743/f2p0/683	683	Y	N	Y	Y
i0_HQ_N_c136725/f16p15/610	610	N	N	Y	Y	i0_HQ_C_c1976/f2p1/296	296	Y	Y	Y	Y
i0_HQ_N_c136727/f5p2/624	624	N	Y	Y	Y	i0_HQ_C_c19769/f2p0/621	621	N	N	Y	Y
i0_HQ_N_c136729/f5p0/250	250	Y	Y	Y	Y	i0_HQ_C_c1977/f6p0/967	967	N	N	Y	N
i0_HQ_N_c136735/f4p1/356	356	Y	Y	Y	Y	i0_HQ_C_c1979/f2p2/492	492	N	N	Y	Y
i0_HQ_N_c136736/f2p1/949	949	N	N	N	Y	i0_HQ_C_c1980/f2p4/336	336	N	N	Y	Y
i0_HQ_N_c136737/f5p1/696	696	N	Y	Y	Y	i0_HQ_C_c19817/f2p3/780	780	N	N	N	Y
i0_HQ_N_c136738/f2p4/944	944	N	N	N	Y	i0_HQ_C_c19839/f4p0/444	444	Y	Y	Y	Y
i0_HQ_N_c136741/f3p2/701	701	N	N	Y	Y	i0_HQ_C_c1984/f4p1/811	811	N	N	Y	Y
i0_HQ_N_c136746/f2p0/243	243	Y	Y	Y	Y	i0_HQ_C_c19842/f2p1/598	598	N	N	Y	Y
i0_HQ_N_c136749/f2p1/601	601	N	Y	Y	Y	i0_HQ_C_c19848/f2p0/651	651	N	N	N	Y
i0_HQ_N_c136751/f20p0/697	697	N	N	Y	Y	i0_HQ_C_c1985/f2p2/373	373	Y	Y	Y	Y
i0_HQ_N_c136760/f2p1/831	831	N	N	N	Y	i0_HQ_C_c1988/f4p2/735	735	N	N	N	Y
i0_HQ_N_c136767/f3p2/384	384	N	N	Y	Y	i0_HQ_C_c1990/f3p0/766	766	N	N	N	Y
i0_HQ_N_c136768/f15p117/342	342	Y	Y	Y	Y	i0_HQ_C_c1991/f4p14/718	718	N	N	N	Y
i0_HQ_N_c136770/f4p5/441	441	Y	Y	Y	Y	i0_HQ_C_c19910/f2p0/962	962	N	N	N	Y
i0_HQ_N_c136772/f2p9/359	359	Y	Y	Y	Y	i0_HQ_C_c19911/f2p0/307	307	Y	Y	Y	Y
i0_HQ_N_c136774/f55p1/960	960	N	N	N	Y	i0_HQ_C_c19915/f3p3/769	769	N	N	Y	N
i0_HQ_N_c136778/f4p2/352	352	Y	Y	Y	Y	i0_HQ_C_c19919/f2p1/672	672	N	N	N	Y
i0_HQ_N_c136779/f2p47/432	432	N	N	Y	Y	i0_HQ_C_c1992/f3p0/269	269	Y	Y	Y	Y
i0_HQ_N_c136780/f10p27/536	536	N	N	N	Y	i0_HQ_C_c19929/f2p10/632	632	N	N	Y	Y
i0_HQ_N_c136781/f3p117/886	886	Y	N	N	Y	i0_HQ_C_c1993/f5p0/846	846	N	N	Y	Y
i0_HQ_N_c136782/f6p24/830	830	N	N	N	Y	i0_HQ_C_c19939/f2p1/736	736	N	N	Y	Y
i0_HQ_N_c136783/f4p0/300	300	Y	Y	Y	Y	i0_HQ_C_c1994/f7p1/621	621	N	Y	Y	Y
i0_HQ_N_c136785/f4p0/270	270	Y	Y	Y	Y	i0_HQ_C_c1995/f2p2/608	608	Y	Y	Y	Y
i0_HQ_N_c136786/f41p8/443	443	N	N	Y	Y	i0_HQ_C_c1997/f3p1/764	764	N	N	N	Y
i0_HQ_N_c136788/f4p0/247	247	Y	Y	Y	Y	i0_HQ_C_c19972/f2p4/637	637	N	N	N	Y
i0_HQ_N_c136793/f13p5/402	402	N	N	Y	Y	i0_HQ_C_c19979/f2p1/392	392	N	Y	Y	Y
i0_HQ_N_c136796/f3p1/616	616	N	N	N	Y	i0_HQ_C_c19984/f5p2/814	814	N	N	Y	Y
i0_HQ_N_c136797/f5p9/569	569	Y	N	Y	Y	i0_HQ_C_c1999/f2p1/640	640	N	Y	Y	Y
i0_HQ_N_c136800/f3p1/592	592	N	N	Y	Y	i0_HQ_C_c2000/f2p0/536	536	Y	Y	Y	Y
i0_HQ_N_c136801/f2p5/546	546	N	N	Y	Y	i0_HQ_C_c20001/f2p1/444	444	N	N	Y	Y
i0_HQ_N_c136803/f2p1/902	902	N	N	Y	Y	i0_HQ_C_c20008/f2p3/313	313	Y	Y	Y	Y
i0_HQ_N_c136809/f85p22/947	947	N	N	Y	Y	i0_HQ_C_c2001/f7p6/734	734	N	N	Y	N
i0_HQ_N_c136814/f20p9/634	634	Y	Y	Y	Y	i0_HQ_C_c20010/f2p2/428	428	Y	Y	Y	Y
i0_HQ_N_c136815/f2p0/268	268	Y	Y	Y	Y	i0_HQ_C_c2002/f5p0/279	279	Y	Y	Y	Y
i0_HQ_N_c136819/f3p6/639	639	N	N	N	Y	i0_HQ_C_c20023/f2p5/693	693	N	N	N	Y
i0_HQ_N_c136820/f2p0/215	215	Y	Y	Y	Y	i0_HQ_C_c2003/f4p1/897	897	N	N	N	Y
i0_HQ_N_c136822/f35p1/291	291	Y	Y	Y	Y	i0_HQ_C_c20039/f2p0/289	289	Y	Y	Y	Y
i0_HQ_N_c136825/f20p3/319	319	Y	Y	Y	Y	i0_HQ_C_c20059/f2p3/853	853	N	Y	Y	Y
i0_HQ_N_c136826/f4p19/345	345	Y	Y	Y	Y	i0_HQ_C_c2006/f2p0/677	677	N	N	Y	Y
i0_HQ_N_c136832/f3p26/612	612	N	N	N	Y	i0_HQ_C_c20061/f2p2/572	572	Y	N	Y	Y
i0_HQ_N_c136833/f5p19/479	479	Y	N	Y	Y	i0_HQ_C_c20062/f2p1/519	519	N	N	Y	Y
i0_HQ_N_c136837/f3p6/335	335	Y	Y	Y	Y	i0_HQ_C_c20070/f2p1/430	430	Y	N	Y	Y
i0_HQ_N_c136839/f11p1/610	610	N	N	Y	Y	i0_HQ_C_c20072/f2p1/422	422	N	N	Y	Y
i0_HQ_N_c13684/f3p0/527	527	Y	N	Y	Y	i0_HQ_C_c2008/f2p2/662	662	N	N	N	Y
i0_HQ_N_c136841/f2p8/461	461	Y	N	Y	Y	i0_HQ_C_c20099/f3p2/348	348	Y	N	Y	Y
i0_HQ_N_c136845/f38p53/497	497	Y	N	N	Y	i0_HQ_C_c201/f16p1/529	529	N	Y	Y	Y
i0_HQ_N_c136846/f13p15/860	860	N	N	N	Y	i0_HQ_C_c2011/f4p1/692	692	N	N	N	Y
i0_HQ_N_c136848/f10p7/421	421	N	N	Y	Y	i0_HQ_C_c2012/f2p0/360	360	Y	N	Y	Y
i0_HQ_N_c136849/f10p6/736	736	N	N	N	Y	i0_HQ_C_c20140/f2p2/805	805	Y	N	Y	Y
i0_HQ_N_c136851/f5p2/307	307	N	N	Y	Y	i0_HQ_C_c2015/f3p1/980	980	N	N	N	Y
i0_HQ_N_c136852/f3p0/916	916	N	N	Y	Y	i0_HQ_C_c20166/f5p0/713	713	N	N	N	Y
i0_HQ_N_c136854/f13p0/706	706	Y	Y	Y	Y	i0_HQ_C_c20171/f2p30/415	415	Y	Y	Y	Y
i0_HQ_N_c136855/f15p2/632	632	N	N	N	Y	i0_HQ_C_c20177/f2p2/994	994	N	N	N	Y
i0_HQ_N_c136857/f12p0/247	247	Y	Y	Y	Y	i0_HQ_C_c2018/f2p1/760	760	N	Y	Y	Y
i0_HQ_N_c136858/f2p4/742	742	N	N	Y	Y	i0_HQ_C_c2019/f3p1/782	782	N	N	N	Y
i0_HQ_N_c136859/f2p3/350	350	Y	Y	Y	Y	i0_HQ_C_c2020/f2p407/990	990	N	N	Y	Y
i0_HQ_N_c136862/f2p3/441	441	N	Y	Y	Y	i0_HQ_C_c20212/f3p2/665	665	N	N	Y	Y
i0_HQ_N_c136865/f2p0/531	531	N	N	Y	Y	i0_HQ_C_c20213/f3p0/443	443	N	N	Y	Y
i0_HQ_N_c136866/f2p1/361	361	Y	N	Y	Y	i0_HQ_C_c20217/f2p3/692	692	N	N	N	Y
i0_HQ_N_c136868/f2p3/751	751	N	N	N	Y	i0_HQ_C_c2022/f4p0/859	859	N	N	N	Y
i0_HQ_N_c136869/f10p3/692	692	N	N	Y	Y	i0_HQ_C_c20228/f2p2/992	992	Y	Y	Y	Y
i0_HQ_N_c136870/f3p0/934	934	N	N	N	Y	i0_HQ_C_c2023/f2p3/641	641	N	N	Y	Y
i0_HQ_N_c136871/f8p4/582	582	N	N	N	Y	i0_HQ_C_c2024/f2p0/263	263	Y	Y	Y	Y
i0_HQ_N_c136872/f7p0/252	252	Y	N	Y	Y	i0_HQ_C_c2025/f3p8/494	494	Y	N	Y	Y
i0_HQ_N_c136874/f2p0/668	668	N	N	Y	Y	i0_HQ_C_c2026/f3p151/872	872	Y	Y	Y	Y
i0_HQ_N_c136875/f7p6/854	854	N	N	N	Y	i0_HQ_C_c20272/f2p14/822	822	N	Y	Y	Y
i0_HQ_N_c136876/f10p3/518	518	N	Y	Y	Y	i0_HQ_C_c2029/f2p4/308	308	Y	Y	Y	Y
i0_HQ_N_c136877/f3p4/507	507	Y	N	Y	Y	i0_HQ_C_c2030/f2p0/284	284	Y	Y	Y	Y
i0_HQ_N_c136879/f5p5/598	598	N	N	Y	Y	i0_HQ_C_c20306/f2p0/687	687	N	N	N	Y
i0_HQ_N_c136881/f4p5/766	766	N	N	Y	Y	i0_HQ_C_c20314/f2p5/891	891	N	N	N	Y
i0_HQ_N_c136882/f7p5/341	341	Y	Y	Y	Y	i0_HQ_C_c20344/f2p4/934	934	N	N	N	Y
i0_HQ_N_c136883/f2p5/700	700	N	N	Y	N	i0_HQ_C_c2035/f6p6/914	914	N	N	Y	Y
i0_HQ_N_c136885/f2p2/499	499	Y	N	Y	Y	i0_HQ_C_c20360/f2p0/278	278	Y	Y	Y	Y
i0_HQ_N_c136886/f2p2/392	392	N	N	Y	Y	i0_HQ_C_c20369/f2p1/409	409	Y	N	Y	Y
i0_HQ_N_c136887/f2p1/496	496	N	N	Y	Y	i0_HQ_C_c20378/f2p0/253	253	Y	Y	Y	Y
i0_HQ_N_c136888/f4p160/805	805	N	N	Y	Y	i0_HQ_C_c2038/f5p9/532	532	N	Y	Y	Y
i0_HQ_N_c136889/f2p2/914	914	N	N	Y	Y	i0_HQ_C_c2039/f2p2/572	572	N	N	Y	Y
i0_HQ_N_c136890/f2p5/390	390	N	N	Y	Y	i0_HQ_C_c20390/f9p4/596	596	Y	N	Y	Y
i0_HQ_N_c136891/f3p2/610	610	N	N	N	Y	i0_HQ_C_c20399/f2p8/488	488	N	N	N	Y
i0_HQ_N_c136893/f6p0/274	274	Y	Y	Y	Y	i0_HQ_C_c2040/f2p1/992	992	Y	Y	Y	N
i0_HQ_N_c136894/f16p6/310	310	Y	Y	Y	Y	i0_HQ_C_c2042/f2p3/375	375	Y	N	Y	Y
i0_HQ_N_c136896/f5p4/495	495	N	N	Y	Y	i0_HQ_C_c20425/f2p0/492	492	N	N	N	Y
i0_HQ_N_c136897/f3p0/256	256	Y	Y	Y	Y	i0_HQ_C_c20427/f3p1/378	378	Y	N	Y	Y
i0_HQ_N_c136898/f16p0/275	275	Y	N	Y	Y	i0_HQ_C_c20428/f2p0/300	300	N	Y	Y	Y
i0_HQ_N_c1369/f7p1/785	785	N	N	N	Y	i0_HQ_C_c20429/f2p3/752	752	N	N	Y	Y
i0_HQ_N_c136902/f3p0/624	624	N	N	N	Y	i0_HQ_C_c2043/f2p0/481	481	Y	Y	Y	Y
i0_HQ_N_c136904/f3p1/713	713	N	N	N	Y	i0_HQ_C_c20443/f2p2/361	361	Y	Y	Y	Y
i0_HQ_N_c136906/f4p1/432	432	N	N	Y	Y	i0_HQ_C_c2045/f4p7/518	518	Y	N	Y	Y
i0_HQ_N_c136907/f2p2/363	363	N	N	Y	Y	i0_HQ_C_c20454/f2p2/505	505	Y	Y	Y	Y
i0_HQ_N_c136909/f3p8/460	460	N	N	N	Y	i0_HQ_C_c20462/f2p0/543	543	N	N	Y	Y
i0_HQ_N_c136911/f4p11/544	544	N	N	N	Y	i0_HQ_C_c20465/f2p2/676	676	Y	N	N	Y
i0_HQ_N_c136912/f2p1/808	808	N	N	N	Y	i0_HQ_C_c20477/f2p1/672	672	Y	N	Y	Y
i0_HQ_N_c136917/f2p2/308	308	Y	Y	Y	Y	i0_HQ_C_c2048/f4p3/570	570	N	N	Y	Y
i0_HQ_N_c136920/f2p2/344	344	Y	Y	Y	Y	i0_HQ_C_c20495/f3p4/926	926	N	Y	Y	Y
i0_HQ_N_c136921/f2p1/331	331	Y	N	Y	Y	i0_HQ_C_c2050/f3p4/934	934	N	N	Y	Y
i0_HQ_N_c136922/f2p6/873	873	N	N	N	Y	i0_HQ_C_c20506/f2p0/247	247	Y	Y	Y	Y
i0_HQ_N_c136924/f12p21/999	999	N	N	N	Y	i0_HQ_C_c2052/f2p0/831	831	N	N	Y	N
i0_HQ_N_c136925/f5p3/484	484	N	N	Y	Y	i0_HQ_C_c20534/f2p2/447	447	Y	N	Y	Y
i0_HQ_N_c136927/f11p5/452	452	Y	Y	Y	Y	i0_HQ_C_c20545/f2p1/692	692	N	N	Y	Y
i0_HQ_N_c136928/f5p0/521	521	N	N	Y	Y	i0_HQ_C_c20548/f2p0/933	933	N	N	N	Y
i0_HQ_N_c136929/f2p24/543	543	N	N	Y	Y	i0_HQ_C_c2055/f4p2/524	524	N	N	N	Y
i0_HQ_N_c136931/f4p0/262	262	Y	Y	Y	Y	i0_HQ_C_c20551/f2p4/1002	1002	N	N	Y	Y
i0_HQ_N_c136933/f2p0/590	590	N	N	Y	Y	i0_HQ_C_c20558/f2p1/372	372	Y	N	Y	Y
i0_HQ_N_c136934/f2p23/912	912	N	N	Y	N	i0_HQ_C_c2056/f4p0/282	282	Y	Y	Y	Y
i0_HQ_N_c136935/f2p3/474	474	N	N	N	Y	i0_HQ_C_c2057/f2p0/473	473	Y	N	Y	Y
i0_HQ_N_c136936/f3p2/937	937	N	N	Y	Y	i0_HQ_C_c20572/f3p1/518	518	Y	Y	Y	Y
i0_HQ_N_c13694/f3p2/645	645	N	Y	N	Y	i0_HQ_C_c20574/f2p0/274	274	Y	Y	Y	Y
i0_HQ_N_c136940/f5p0/713	713	Y	Y	Y	Y	i0_HQ_C_c20577/f2p0/428	428	Y	Y	Y	Y
i0_HQ_N_c136942/f2p0/259	259	Y	Y	Y	Y	i0_HQ_C_c20579/f3p0/773	773	N	N	Y	N
i0_HQ_N_c136943/f2p15/428	428	N	N	Y	Y	i0_HQ_C_c2058/f8p5/489	489	Y	N	Y	Y
i0_HQ_N_c136944/f4p4/736	736	Y	N	N	Y	i0_HQ_C_c2060/f2p0/438	438	Y	Y	Y	Y
i0_HQ_N_c136945/f3p1/635	635	N	N	N	Y	i0_HQ_C_c2061/f7p5/655	655	Y	Y	Y	Y
i0_HQ_N_c136947/f2p2/609	609	N	N	Y	Y	i0_HQ_C_c20611/f2p2/554	554	N	N	N	Y
i0_HQ_N_c136948/f3p3/583	583	N	N	N	Y	i0_HQ_C_c2062/f3p0/544	544	Y	N	Y	Y
i0_HQ_N_c136949/f3p1/406	406	Y	Y	Y	Y	i0_HQ_C_c20634/f2p0/248	248	N	Y	Y	Y
i0_HQ_N_c136951/f30p0/215	215	Y	Y	Y	Y	i0_HQ_C_c20639/f2p1/522	522	N	Y	Y	Y
i0_HQ_N_c136952/f15p4/806	806	N	N	Y	Y	i0_HQ_C_c2064/f4p3/401	401	Y	N	Y	Y
i0_HQ_N_c136955/f3p7/607	607	N	N	Y	Y	i0_HQ_C_c20643/f3p0/266	266	Y	Y	Y	Y
i0_HQ_N_c136957/f2p2/407	407	Y	N	Y	Y	i0_HQ_C_c20650/f2p2/604	604	Y	N	Y	Y
i0_HQ_N_c136958/f34p2/842	842	N	N	N	Y	i0_HQ_C_c20651/f2p8/957	957	N	N	Y	Y
i0_HQ_N_c136959/f17p8/695	695	N	N	N	Y	i0_HQ_C_c20653/f3p0/633	633	N	N	Y	Y
i0_HQ_N_c136960/f8p6/777	777	N	N	Y	Y	i0_HQ_C_c2066/f2p0/534	534	Y	Y	Y	Y
i0_HQ_N_c136962/f4p0/242	242	Y	Y	Y	Y	i0_HQ_C_c20662/f2p1/474	474	Y	Y	Y	Y
i0_HQ_N_c136963/f5p30/784	784	N	N	Y	Y	i0_HQ_C_c20675/f2p0/881	881	N	N	N	Y
i0_HQ_N_c136965/f3p10/471	471	N	N	Y	Y	i0_HQ_C_c20694/f3p15/620	620	Y	N	Y	Y
i0_HQ_N_c136967/f2p2/513	513	N	N	Y	Y	i0_HQ_C_c2070/f4p3/582	582	N	N	N	Y
i0_HQ_N_c136968/f5p6/510	510	N	N	N	Y	i0_HQ_C_c20706/f2p8/334	334	Y	Y	Y	Y
i0_HQ_N_c13697/f4p1/889	889	N	Y	Y	Y	i0_HQ_C_c2071/f4p0/570	570	N	N	Y	Y
i0_HQ_N_c136970/f2p0/286	286	Y	Y	Y	Y	i0_HQ_C_c20734/f2p3/401	401	N	N	Y	Y
i0_HQ_N_c136971/f6p2/302	302	Y	Y	Y	Y	i0_HQ_C_c2074/f2p1/319	319	Y	N	Y	Y
i0_HQ_N_c136972/f29p5/282	282	Y	Y	Y	Y	i0_HQ_C_c2075/f2p1/406	406	Y	Y	Y	Y
i0_HQ_N_c136974/f2p23/553	553	N	N	N	Y	i0_HQ_C_c2078/f2p1/545	545	N	N	N	Y
i0_HQ_N_c136975/f13p1/373	373	N	N	Y	Y	i0_HQ_C_c2079/f4p0/727	727	N	N	Y	Y
i0_HQ_N_c136976/f8p1/558	558	N	Y	Y	Y	i0_HQ_C_c2080/f7p4/462	462	N	N	Y	Y
i0_HQ_N_c136978/f3p2/951	951	N	N	N	Y	i0_HQ_C_c2081/f2p0/886	886	N	N	Y	N
i0_HQ_N_c136979/f2p2/353	353	N	Y	Y	Y	i0_HQ_C_c20817/f2p0/839	839	N	Y	Y	Y
i0_HQ_N_c136980/f7p2/559	559	N	N	Y	Y	i0_HQ_C_c20818/f2p1/441	441	Y	N	Y	Y
i0_HQ_N_c136981/f3p0/389	389	Y	Y	Y	Y	i0_HQ_C_c2082/f3p0/359	359	N	N	Y	Y
i0_HQ_N_c136984/f12p331/677	677	N	N	N	Y	i0_HQ_C_c2083/f3p1/601	601	N	N	N	Y
i0_HQ_N_c136985/f4p3/518	518	N	N	N	Y	i0_HQ_C_c2086/f2p0/562	562	N	N	Y	Y
i0_HQ_N_c136986/f4p16/744	744	N	N	N	Y	i0_HQ_C_c20863/f2p0/873	873	N	N	Y	Y
i0_HQ_N_c136988/f2p196/341	341	Y	Y	Y	Y	i0_HQ_C_c2088/f3p2/810	810	Y	Y	Y	Y
i0_HQ_N_c136989/f2p6/673	673	N	N	N	Y	i0_HQ_C_c2089/f5p3/548	548	N	N	Y	Y
i0_HQ_N_c13699/f2p0/893	893	N	Y	Y	Y	i0_HQ_C_c20902/f2p0/254	254	Y	N	Y	Y
i0_HQ_N_c136990/f5p0/240	240	Y	Y	Y	Y	i0_HQ_C_c20909/f3p2/788	788	N	N	N	Y
i0_HQ_N_c136991/f3p2/310	310	Y	Y	Y	Y	i0_HQ_C_c20918/f4p2/751	751	N	N	Y	Y
i0_HQ_N_c136998/f25p1/268	268	Y	Y	Y	Y	i0_HQ_C_c2092/f3p1/288	288	Y	Y	Y	Y
i0_HQ_N_c136999/f4p126/401	401	N	N	N	Y	i0_HQ_C_c2094/f2p0/290	290	Y	Y	Y	Y
i0_HQ_N_c1370/f9p2/829	829	N	N	N	Y	i0_HQ_C_c20940/f2p0/439	439	N	N	Y	Y
i0_HQ_N_c137000/f23p0/866	866	N	N	Y	Y	i0_HQ_C_c2097/f9p4/531	531	Y	N	Y	Y
i0_HQ_N_c137001/f57p25/608	608	N	N	Y	Y	i0_HQ_C_c20971/f2p70/457	457	Y	N	N	Y
i0_HQ_N_c137003/f5p13/474	474	N	N	Y	Y	i0_HQ_C_c20972/f2p0/854	854	N	N	Y	Y
i0_HQ_N_c137004/f11p4/427	427	Y	N	Y	Y	i0_HQ_C_c20973/f2p1/463	463	Y	N	Y	Y
i0_HQ_N_c137005/f2p1/620	620	N	N	Y	Y	i0_HQ_C_c20975/f2p8/557	557	N	N	Y	Y
i0_HQ_N_c137006/f3p0/589	589	N	N	Y	Y	i0_HQ_C_c2099/f2p0/386	386	Y	N	Y	Y
i0_HQ_N_c137008/f11p0/714	714	N	N	Y	Y	i0_HQ_C_c21000/f2p2/423	423	N	N	Y	Y
i0_HQ_N_c137009/f2p5/826	826	N	N	Y	Y	i0_HQ_C_c21010/f4p7/968	968	N	N	Y	Y
i0_HQ_N_c137011/f2p2/753	753	N	N	N	Y	i0_HQ_C_c21017/f4p5/370	370	N	N	Y	Y
i0_HQ_N_c137012/f11p2/979	979	N	N	N	Y	i0_HQ_C_c21027/f2p0/594	594	N	N	Y	Y
i0_HQ_N_c137013/f2p4/608	608	N	N	N	Y	i0_HQ_C_c21036/f3p1/417	417	Y	Y	Y	Y
i0_HQ_N_c137014/f3p19/354	354	Y	Y	Y	Y	i0_HQ_C_c2104/f3p0/284	284	Y	Y	Y	Y
i0_HQ_N_c137015/f2p22/678	678	Y	N	Y	Y	i0_HQ_C_c2105/f2p0/647	647	N	Y	Y	Y
i0_HQ_N_c137016/f3p5/343	343	Y	Y	Y	Y	i0_HQ_C_c2106/f2p2/784	784	N	N	N	Y
i0_HQ_N_c137017/f5p2/753	753	N	N	N	Y	i0_HQ_C_c2107/f4p4/514	514	N	N	Y	Y
i0_HQ_N_c137018/f2p0/252	252	Y	Y	Y	Y	i0_HQ_C_c2109/f2p2/508	508	N	N	N	Y
i0_HQ_N_c137019/f6p2/445	445	Y	Y	Y	Y	i0_HQ_C_c2110/f3p3/851	851	N	N	N	Y
i0_HQ_N_c137020/f2p3/381	381	Y	Y	Y	Y	i0_HQ_C_c21106/f2p0/246	246	Y	Y	Y	Y
i0_HQ_N_c137021/f4p1/366	366	Y	Y	Y	Y	i0_HQ_C_c21111/f2p1/408	408	Y	Y	Y	Y
i0_HQ_N_c137022/f2p1/669	669	N	N	N	Y	i0_HQ_C_c21119/f3p1/685	685	N	N	N	Y
i0_HQ_N_c137024/f6p6/321	321	Y	Y	Y	Y	i0_HQ_C_c21126/f4p3/757	757	N	Y	Y	Y
i0_HQ_N_c137025/f29p4/761	761	N	N	N	Y	i0_HQ_C_c21131/f2p4/604	604	N	N	N	Y
i0_HQ_N_c137026/f12p6/430	430	Y	N	Y	Y	i0_HQ_C_c21136/f2p3/790	790	N	N	Y	Y
i0_HQ_N_c137027/f35p8/718	718	N	N	Y	Y	i0_HQ_C_c21137/f2p9/369	369	N	N	N	Y
i0_HQ_N_c137029/f17p4/537	537	N	Y	Y	Y	i0_HQ_C_c21140/f2p0/792	792	Y	N	Y	Y
i0_HQ_N_c137030/f14p15/655	655	N	N	Y	Y	i0_HQ_C_c21142/f2p1/708	708	N	N	N	Y
i0_HQ_N_c137031/f2p8/475	475	Y	N	Y	Y	i0_HQ_C_c21151/f2p1/716	716	N	N	N	Y
i0_HQ_N_c137037/f5p3/404	404	N	N	Y	Y	i0_HQ_C_c21160/f2p0/445	445	Y	Y	Y	Y
i0_HQ_N_c137039/f10p0/383	383	Y	Y	Y	Y	i0_HQ_C_c21163/f2p0/419	419	Y	N	Y	Y
i0_HQ_N_c137040/f4p0/254	254	Y	Y	Y	Y	i0_HQ_C_c2117/f2p0/354	354	Y	Y	Y	Y
i0_HQ_N_c137042/f3p21/724	724	N	Y	Y	Y	i0_HQ_C_c21186/f2p0/984	984	N	N	Y	Y
i0_HQ_N_c137043/f103p21/816	816	N	N	N	Y	i0_HQ_C_c21188/f2p2/865	865	N	N	Y	Y
i0_HQ_N_c137044/f3p3/306	306	Y	Y	Y	Y	i0_HQ_C_c2119/f2p0/496	496	N	N	Y	Y
i0_HQ_N_c137046/f46p30/546	546	N	N	Y	Y	i0_HQ_C_c21194/f3p1/873	873	N	N	N	Y
i0_HQ_N_c137047/f11p0/245	245	Y	Y	Y	Y	i0_HQ_C_c2120/f7p3/764	764	N	N	N	Y
i0_HQ_N_c137049/f26p5/325	325	Y	Y	Y	Y	i0_HQ_C_c21200/f2p1/533	533	Y	N	Y	Y
i0_HQ_N_c137050/f4p1/303	303	Y	Y	Y	Y	i0_HQ_C_c2121/f2p47/962	962	Y	N	N	Y
i0_HQ_N_c137052/f24p5/391	391	Y	Y	Y	Y	i0_HQ_C_c2122/f5p3/610	610	N	N	Y	Y
i0_HQ_N_c137053/f3p10/440	440	Y	N	Y	Y	i0_HQ_C_c2123/f4p6/507	507	N	Y	Y	Y
i0_HQ_N_c137055/f14p0/214	214	Y	Y	Y	Y	i0_HQ_C_c21232/f4p2/467	467	Y	Y	Y	Y
i0_HQ_N_c137057/f10p315/867	867	N	N	N	Y	i0_HQ_C_c2124/f7p4/759	759	N	N	Y	Y
i0_HQ_N_c137058/f22p21/407	407	Y	Y	Y	Y	i0_HQ_C_c21249/f2p2/739	739	N	N	Y	Y
i0_HQ_N_c137061/f63p16/790	790	N	N	N	Y	i0_HQ_C_c21251/f2p17/537	537	Y	N	Y	Y
i0_HQ_N_c137063/f3p40/541	541	Y	N	N	Y	i0_HQ_C_c21254/f2p2/393	393	N	N	Y	Y
i0_HQ_N_c137068/f2p1/624	624	N	Y	Y	Y	i0_HQ_C_c21279/f2p5/344	344	Y	Y	Y	Y
i0_HQ_N_c137070/f2p4/832	832	N	N	N	Y	i0_HQ_C_c21280/f2p0/293	293	Y	Y	Y	Y
i0_HQ_N_c137074/f18p4/544	544	Y	Y	Y	Y	i0_HQ_C_c21287/f2p3/660	660	N	Y	Y	Y
i0_HQ_N_c137077/f5p5/364	364	Y	Y	Y	Y	i0_HQ_C_c2129/f3p0/755	755	N	N	Y	Y
i0_HQ_N_c137083/f16p3/310	310	Y	Y	Y	Y	i0_HQ_C_c21290/f2p3/796	796	N	N	N	Y
i0_HQ_N_c137085/f117p20/742	742	N	N	N	Y	i0_HQ_C_c21298/f2p0/558	558	N	N	N	Y
i0_HQ_N_c137087/f2p16/933	933	N	N	N	Y	i0_HQ_C_c2130/f4p6/583	583	Y	Y	Y	N
i0_HQ_N_c137089/f2p4/409	409	Y	Y	Y	Y	i0_HQ_C_c2131/f2p1/683	683	N	N	N	Y
i0_HQ_N_c137090/f2p0/283	283	Y	Y	Y	Y	i0_HQ_C_c21312/f3p1/827	827	N	N	N	Y
i0_HQ_N_c137091/f2p0/277	277	Y	Y	Y	Y	i0_HQ_C_c21333/f2p0/302	302	Y	Y	Y	Y
i0_HQ_N_c137092/f2p7/698	698	N	N	N	Y	i0_HQ_C_c2134/f3p0/771	771	Y	Y	Y	Y
i0_HQ_N_c137094/f13p20/600	600	N	N	Y	Y	i0_HQ_C_c21341/f2p2/370	370	Y	N	Y	Y
i0_HQ_N_c137101/f2p0/338	338	Y	N	Y	Y	i0_HQ_C_c21342/f2p0/451	451	N	Y	Y	Y
i0_HQ_N_c137102/f3p4/877	877	N	N	N	Y	i0_HQ_C_c2135/f6p12/667	667	N	N	Y	Y
i0_HQ_N_c137106/f5p48/959	959	Y	N	N	Y	i0_HQ_C_c21361/f2p0/289	289	Y	Y	Y	Y
i0_HQ_N_c137108/f11p2/618	618	N	N	Y	Y	i0_HQ_C_c21370/f2p0/416	416	N	Y	Y	Y
i0_HQ_N_c13711/f2p0/604	604	N	N	N	Y	i0_HQ_C_c2139/f3p9/510	510	N	N	N	Y
i0_HQ_N_c137116/f2p0/344	344	Y	Y	Y	Y	i0_HQ_C_c21398/f2p1/310	310	Y	Y	Y	Y
i0_HQ_N_c137120/f5p5/352	352	N	Y	Y	Y	i0_HQ_C_c21400/f2p0/281	281	Y	Y	Y	Y
i0_HQ_N_c137123/f2p0/726	726	N	N	N	Y	i0_HQ_C_c21412/f2p1/463	463	N	N	Y	Y
i0_HQ_N_c137130/f23p10/849	849	N	N	Y	Y	i0_HQ_C_c2142/f2p0/298	298	Y	Y	Y	Y
i0_HQ_N_c137133/f21p3/451	451	N	N	N	Y	i0_HQ_C_c2144/f3p5/614	614	N	N	Y	Y
i0_HQ_N_c137137/f55p5/385	385	Y	Y	Y	Y	i0_HQ_C_c2145/f2p0/738	738	Y	N	Y	Y
i0_HQ_N_c137142/f24p0/289	289	Y	Y	Y	Y	i0_HQ_C_c2146/f2p10/611	611	Y	N	Y	Y
i0_HQ_N_c137144/f2p12/735	735	N	N	N	Y	i0_HQ_C_c21462/f3p11/296	296	N	N	Y	Y
i0_HQ_N_c137147/f64p0/227	227	Y	Y	Y	Y	i0_HQ_C_c2147/f3p83/492	492	Y	N	Y	Y
i0_HQ_N_c137148/f2p15/359	359	N	N	Y	Y	i0_HQ_C_c21471/f2p1/791	791	N	N	Y	Y
i0_HQ_N_c137152/f10p12/541	541	Y	N	Y	Y	i0_HQ_C_c2148/f2p1/619	619	N	N	Y	Y
i0_HQ_N_c137154/f78p20/494	494	N	N	Y	Y	i0_HQ_C_c21481/f2p33/707	707	N	N	Y	Y
i0_HQ_N_c137163/f99p7/588	588	N	N	Y	Y	i0_HQ_C_c2149/f2p0/941	941	N	N	N	Y
i0_HQ_N_c137164/f19p0/247	247	Y	Y	Y	Y	i0_HQ_C_c21511/f2p1/321	321	N	Y	Y	Y
i0_HQ_N_c137172/f46p41/551	551	Y	N	N	Y	i0_HQ_C_c21515/f3p7/436	436	Y	N	Y	Y
i0_HQ_N_c137173/f10p42/847	847	Y	N	Y	Y	i0_HQ_C_c2152/f2p1/386	386	Y	N	Y	Y
i0_HQ_N_c137182/f18p6/393	393	N	N	Y	Y	i0_HQ_C_c2155/f3p3/505	505	N	Y	Y	Y
i0_HQ_N_c137185/f107p14/863	863	N	N	Y	Y	i0_HQ_C_c21551/f2p0/684	684	N	N	Y	N
i0_HQ_N_c137195/f3p2/832	832	N	N	N	Y	i0_HQ_C_c2156/f4p5/360	360	Y	N	Y	Y
i0_HQ_N_c137197/f55p91/334	334	Y	Y	Y	Y	i0_HQ_C_c2157/f3p4/836	836	N	N	Y	Y
i0_HQ_N_c1372/f5p3/559	559	N	N	Y	Y	i0_HQ_C_c21585/f2p6/1023	1023	N	N	N	Y
i0_HQ_N_c13721/f3p0/626	626	N	N	Y	Y	i0_HQ_C_c21588/f2p0/797	797	N	Y	Y	Y
i0_HQ_N_c137210/f36p17/324	324	Y	Y	Y	Y	i0_HQ_C_c2160/f4p9/344	344	Y	Y	Y	Y
i0_HQ_N_c137211/f78p0/294	294	Y	Y	Y	Y	i0_HQ_C_c21603/f7p2/893	893	N	N	Y	N
i0_HQ_N_c137213/f29p0/262	262	Y	Y	Y	Y	i0_HQ_C_c21606/f2p0/599	599	Y	N	Y	Y
i0_HQ_N_c137215/f53p613/416	416	Y	N	Y	Y	i0_HQ_C_c21616/f2p1/512	512	Y	N	Y	Y
i0_HQ_N_c137220/f11p36/992	992	N	N	N	Y	i0_HQ_C_c21625/f2p2/479	479	Y	N	Y	Y
i0_HQ_N_c137226/f3p40/686	686	N	N	N	Y	i0_HQ_C_c2163/f2p1/353	353	Y	Y	Y	Y
i0_HQ_N_c137228/f13p7/512	512	N	Y	Y	Y	i0_HQ_C_c21635/f2p0/842	842	N	N	Y	N
i0_HQ_N_c137231/f12p96/704	704	N	N	N	Y	i0_HQ_C_c21639/f2p2/416	416	Y	N	Y	Y
i0_HQ_N_c137232/f16p34/651	651	N	N	N	Y	i0_HQ_C_c2164/f2p0/272	272	Y	Y	Y	Y
i0_HQ_N_c137233/f4p5/544	544	N	N	Y	Y	i0_HQ_C_c21648/f2p28/859	859	N	N	Y	Y
i0_HQ_N_c137235/f4p9/637	637	N	N	N	Y	i0_HQ_C_c21650/f2p0/1000	1000	N	N	Y	N
i0_HQ_N_c137237/f2p2/894	894	N	N	N	Y	i0_HQ_C_c21654/f2p0/524	524	N	N	Y	Y
i0_HQ_N_c137239/f12p66/638	638	N	N	N	Y	i0_HQ_C_c21679/f2p3/731	731	N	Y	N	Y
i0_HQ_N_c137240/f4p6/816	816	N	N	Y	Y	i0_HQ_C_c2169/f2p1/798	798	Y	Y	Y	Y
i0_HQ_N_c137241/f10p0/226	226	Y	Y	Y	Y	i0_HQ_C_c21696/f2p0/845	845	N	N	N	Y
i0_HQ_N_c137243/f4p15/440	440	Y	Y	Y	Y	i0_HQ_C_c21716/f2p0/242	242	Y	Y	Y	Y
i0_HQ_N_c137247/f3p82/683	683	N	N	Y	N	i0_HQ_C_c21727/f2p7/596	596	N	N	Y	Y
i0_HQ_N_c137249/f3p4/468	468	N	N	Y	Y	i0_HQ_C_c21744/f2p2/644	644	Y	Y	Y	Y
i0_HQ_N_c137254/f3p0/220	220	Y	Y	Y	Y	i0_HQ_C_c2175/f2p0/670	670	N	N	Y	Y
i0_HQ_N_c137255/f3p1/434	434	Y	N	Y	Y	i0_HQ_C_c21753/f2p5/841	841	N	N	Y	Y
i0_HQ_N_c137257/f8p1/507	507	N	N	N	Y	i0_HQ_C_c21767/f2p174/755	755	Y	N	Y	Y
i0_HQ_N_c137260/f2p60/767	767	Y	N	N	Y	i0_HQ_C_c21769/f2p4/461	461	Y	Y	Y	Y
i0_HQ_N_c137261/f8p33/664	664	N	N	Y	Y	i0_HQ_C_c2177/f2p5/610	610	N	N	Y	Y
i0_HQ_N_c137262/f4p3/628	628	N	N	N	Y	i0_HQ_C_c2178/f9p6/638	638	Y	Y	Y	Y
i0_HQ_N_c137263/f4p14/424	424	Y	N	Y	Y	i0_HQ_C_c21798/f2p0/402	402	N	Y	Y	Y
i0_HQ_N_c13727/f2p0/376	376	Y	Y	Y	Y	i0_HQ_C_c21803/f2p5/566	566	N	N	N	Y
i0_HQ_N_c137271/f2p6/370	370	N	N	Y	Y	i0_HQ_C_c21811/f4p1/641	641	N	N	N	Y
i0_HQ_N_c137273/f10p0/216	216	Y	Y	Y	Y	i0_HQ_C_c21818/f2p9/314	314	Y	N	Y	Y
i0_HQ_N_c137278/f2p0/217	217	Y	Y	Y	Y	i0_HQ_C_c2182/f3p1/751	751	N	N	N	Y
i0_HQ_N_c137281/f10p0/220	220	Y	Y	Y	Y	i0_HQ_C_c21820/f2p2/369	369	Y	Y	Y	Y
i0_HQ_N_c137285/f5p0/238	238	Y	Y	Y	Y	i0_HQ_C_c2185/f4p1/511	511	Y	N	Y	Y
i0_HQ_N_c137287/f5p3/438	438	Y	N	Y	Y	i0_HQ_C_c2186/f4p12/546	546	N	N	Y	Y
i0_HQ_N_c137291/f4p2/364	364	Y	N	N	Y	i0_HQ_C_c21887/f2p0/440	440	Y	Y	Y	Y
i0_HQ_N_c137295/f5p0/944	944	N	N	Y	N	i0_HQ_C_c2194/f2p4/527	527	N	Y	Y	Y
i0_HQ_N_c137297/f2p7/822	822	N	N	Y	Y	i0_HQ_C_c21948/f3p2/435	435	Y	N	Y	Y
i0_HQ_N_c137298/f4p36/316	316	Y	Y	Y	Y	i0_HQ_C_c21959/f2p0/896	896	N	N	Y	N
i0_HQ_N_c137299/f2p1/432	432	N	N	Y	Y	i0_HQ_C_c21962/f2p0/347	347	N	Y	Y	Y
i0_HQ_N_c1373/f2p3/596	596	N	N	Y	Y	i0_HQ_C_c21971/f3p0/631	631	N	N	N	Y
i0_HQ_N_c137300/f15p0/215	215	Y	Y	Y	Y	i0_HQ_C_c21988/f2p0/285	285	Y	Y	Y	Y
i0_HQ_N_c137305/f14p45/400	400	Y	Y	Y	Y	i0_HQ_C_c2199/f7p5/459	459	Y	N	Y	Y
i0_HQ_N_c137310/f17p10/314	314	Y	Y	Y	Y	i0_HQ_C_c21998/f2p7/967	967	N	N	Y	Y
i0_HQ_N_c137312/f19p52/567	567	Y	N	Y	Y	i0_HQ_C_c2202/f5p1/717	717	N	N	N	Y
i0_HQ_N_c137316/f2p0/218	218	Y	N	Y	Y	i0_HQ_C_c22021/f3p0/263	263	Y	N	Y	Y
i0_HQ_N_c137317/f12p15/884	884	N	N	N	Y	i0_HQ_C_c22038/f2p0/489	489	N	Y	Y	Y
i0_HQ_N_c137320/f2p0/230	230	Y	Y	Y	Y	i0_HQ_C_c2204/f2p8/559	559	N	Y	Y	Y
i0_HQ_N_c137321/f17p8/548	548	N	N	Y	Y	i0_HQ_C_c2206/f2p1/624	624	Y	Y	Y	Y
i0_HQ_N_c137322/f15p0/302	302	N	N	Y	Y	i0_HQ_C_c22061/f2p2/482	482	Y	Y	Y	Y
i0_HQ_N_c137323/f17p0/230	230	Y	N	Y	Y	i0_HQ_C_c22063/f2p12/368	368	Y	N	Y	Y
i0_HQ_N_c137324/f12p4/668	668	N	Y	Y	Y	i0_HQ_C_c2207/f3p2/377	377	Y	Y	Y	Y
i0_HQ_N_c137326/f10p7/335	335	N	Y	Y	Y	i0_HQ_C_c2210/f3p1/818	818	N	N	Y	Y
i0_HQ_N_c137329/f8p2/393	393	Y	Y	Y	Y	i0_HQ_C_c2211/f4p47/699	699	Y	N	Y	Y
i0_HQ_N_c137332/f3p22/347	347	N	N	Y	Y	i0_HQ_C_c22122/f2p0/290	290	Y	Y	Y	Y
i0_HQ_N_c13734/f2p5/964	964	N	N	N	Y	i0_HQ_C_c22128/f2p2/539	539	Y	Y	Y	Y
i0_HQ_N_c137340/f10p3/404	404	Y	N	Y	Y	i0_HQ_C_c22139/f2p3/337	337	N	N	Y	Y
i0_HQ_N_c137342/f19p8/576	576	N	N	Y	Y	i0_HQ_C_c2214/f5p3/752	752	N	N	N	Y
i0_HQ_N_c137346/f6p0/226	226	Y	Y	Y	Y	i0_HQ_C_c2215/f4p4/480	480	Y	N	Y	Y
i0_HQ_N_c137356/f3p0/217	217	Y	Y	Y	Y	i0_HQ_C_c2216/f2p2/759	759	N	N	N	Y
i0_HQ_N_c137361/f5p12/451	451	N	N	Y	Y	i0_HQ_C_c22168/f3p1/405	405	Y	Y	Y	Y
i0_HQ_N_c137362/f2p0/230	230	Y	N	Y	Y	i0_HQ_C_c2217/f5p6/655	655	N	N	Y	Y
i0_HQ_N_c137363/f5p0/213	213	Y	Y	Y	Y	i0_HQ_C_c22175/f2p1/380	380	Y	Y	Y	Y
i0_HQ_N_c137370/f5p7/583	583	N	N	Y	Y	i0_HQ_C_c2219/f5p22/751	751	N	N	N	Y
i0_HQ_N_c137373/f2p0/233	233	Y	Y	Y	Y	i0_HQ_C_c2220/f7p0/348	348	Y	Y	Y	Y
i0_HQ_N_c137381/f2p0/277	277	Y	Y	Y	Y	i0_HQ_C_c22204/f2p0/511	511	N	N	Y	Y
i0_HQ_N_c137383/f2p8/306	306	Y	Y	Y	Y	i0_HQ_C_c2222/f7p1/419	419	N	N	Y	Y
i0_HQ_N_c137384/f5p0/247	247	Y	Y	Y	Y	i0_HQ_C_c2223/f2p0/699	699	N	Y	Y	Y
i0_HQ_N_c137386/f3p0/220	220	N	Y	Y	Y	i0_HQ_C_c2225/f3p4/731	731	Y	Y	Y	Y
i0_HQ_N_c137388/f2p0/221	221	Y	Y	Y	Y	i0_HQ_C_c22267/f3p1/677	677	N	N	Y	Y
i0_HQ_N_c137390/f2p0/214	214	Y	Y	Y	Y	i0_HQ_C_c2227/f4p5/370	370	Y	Y	Y	Y
i0_HQ_N_c137391/f3p4/545	545	N	N	N	Y	i0_HQ_C_c2230/f7p4/807	807	N	Y	Y	Y
i0_HQ_N_c137393/f2p0/207	207	Y	N	Y	Y	i0_HQ_C_c22305/f2p1/698	698	N	N	N	Y
i0_HQ_N_c137403/f4p21/612	612	Y	N	Y	Y	i0_HQ_C_c22314/f3p0/641	641	N	N	Y	Y
i0_HQ_N_c137406/f3p4/508	508	N	N	N	Y	i0_HQ_C_c22330/f2p1/665	665	N	N	N	Y
i0_HQ_N_c137408/f13p0/412	412	Y	N	N	Y	i0_HQ_C_c22333/f3p1/359	359	Y	Y	Y	Y
i0_HQ_N_c137428/f18p2/552	552	N	Y	N	Y	i0_HQ_C_c22335/f2p4/673	673	N	N	N	Y
i0_HQ_N_c137432/f6p2/797	797	N	N	Y	Y	i0_HQ_C_c22346/f2p2/302	302	Y	Y	Y	Y
i0_HQ_N_c137436/f18p21/475	475	Y	Y	Y	Y	i0_HQ_C_c2235/f5p0/492	492	N	N	Y	Y
i0_HQ_N_c137440/f3p3/374	374	N	N	Y	Y	i0_HQ_C_c22368/f2p0/464	464	N	N	Y	Y
i0_HQ_N_c137453/f10p16/973	973	N	N	Y	Y	i0_HQ_C_c22379/f2p5/518	518	N	N	Y	Y
i0_HQ_N_c137462/f34p1/675	675	N	N	N	Y	i0_HQ_C_c22384/f2p0/431	431	Y	Y	Y	Y
i0_HQ_N_c137465/f38p1/623	623	N	N	Y	Y	i0_HQ_C_c22387/f2p3/814	814	Y	N	Y	Y
i0_HQ_N_c137474/f73p14/736	736	N	N	Y	Y	i0_HQ_C_c22397/f2p1/421	421	Y	Y	Y	Y
i0_HQ_N_c137476/f22p11/752	752	N	N	Y	N	i0_HQ_C_c2240/f2p0/805	805	N	N	N	Y
i0_HQ_N_c137481/f4p30/723	723	N	N	N	Y	i0_HQ_C_c22406/f2p0/725	725	N	N	N	Y
i0_HQ_N_c137491/f17p1/832	832	N	N	N	Y	i0_HQ_C_c22414/f2p3/565	565	N	Y	Y	Y
i0_HQ_N_c137499/f17p4/568	568	N	N	N	Y	i0_HQ_C_c22443/f2p1/303	303	Y	Y	Y	Y
i0_HQ_N_c1375/f5p3/632	632	N	N	N	Y	i0_HQ_C_c2245/f4p7/544	544	N	N	Y	Y
i0_HQ_N_c137500/f7p0/250	250	N	Y	Y	Y	i0_HQ_C_c22454/f2p5/446	446	Y	N	Y	Y
i0_HQ_N_c137501/f13p1/892	892	N	N	N	Y	i0_HQ_C_c22465/f4p4/519	519	N	N	Y	Y
i0_HQ_N_c137504/f12p7/626	626	Y	N	N	Y	i0_HQ_C_c22468/f2p1/344	344	Y	Y	Y	Y
i0_HQ_N_c137505/f2p0/223	223	Y	Y	Y	Y	i0_HQ_C_c2248/f3p0/769	769	N	Y	N	Y
i0_HQ_N_c137511/f14p19/868	868	N	N	N	Y	i0_HQ_C_c22500/f2p6/434	434	Y	Y	Y	Y
i0_HQ_N_c137520/f2p14/918	918	N	N	N	Y	i0_HQ_C_c2251/f4p1/649	649	Y	Y	Y	Y
i0_HQ_N_c137521/f16p12/403	403	Y	N	Y	Y	i0_HQ_C_c22513/f2p0/418	418	Y	Y	Y	Y
i0_HQ_N_c137524/f10p17/630	630	Y	Y	Y	Y	i0_HQ_C_c2252/f3p0/623	623	N	Y	Y	Y
i0_HQ_N_c13753/f2p2/636	636	N	N	N	Y	i0_HQ_C_c22535/f2p1/314	314	Y	Y	Y	Y
i0_HQ_N_c137537/f18p0/223	223	Y	N	Y	Y	i0_HQ_C_c2256/f10p1/628	628	N	N	Y	Y
i0_HQ_N_c137539/f3p311/659	659	N	N	N	Y	i0_HQ_C_c22565/f2p1/671	671	N	N	Y	Y
i0_HQ_N_c137541/f40p19/331	331	N	Y	Y	Y	i0_HQ_C_c22572/f2p28/463	463	Y	Y	Y	Y
i0_HQ_N_c137549/f11p14/669	669	N	N	N	Y	i0_HQ_C_c22592/f2p5/977	977	N	N	N	Y
i0_HQ_N_c137554/f21p27/548	548	N	N	Y	Y	i0_HQ_C_c22594/f2p1/469	469	Y	Y	Y	Y
i0_HQ_N_c137555/f18p13/863	863	N	N	Y	Y	i0_HQ_C_c22603/f2p5/639	639	N	N	N	Y
i0_HQ_N_c137557/f12p0/227	227	Y	Y	Y	Y	i0_HQ_C_c22627/f2p0/425	425	Y	Y	Y	Y
i0_HQ_N_c137560/f2p5/545	545	N	N	N	Y	i0_HQ_C_c2263/f3p3/476	476	N	N	Y	Y
i0_HQ_N_c137567/f16p0/269	269	Y	Y	Y	Y	i0_HQ_C_c22639/f2p0/703	703	N	N	Y	Y
i0_HQ_N_c137571/f15p5/379	379	N	N	Y	Y	i0_HQ_C_c2265/f2p2/606	606	N	N	Y	Y
i0_HQ_N_c137573/f6p5/999	999	N	N	Y	N	i0_HQ_C_c22658/f4p2/372	372	N	N	Y	Y
i0_HQ_N_c137576/f10p22/639	639	N	N	N	Y	i0_HQ_C_c2266/f2p2/509	509	N	Y	Y	Y
i0_HQ_N_c137580/f18p21/660	660	N	N	Y	Y	i0_HQ_C_c2267/f2p0/871	871	N	N	N	Y
i0_HQ_N_c137582/f10p0/242	242	Y	Y	Y	Y	i0_HQ_C_c22671/f2p0/282	282	Y	Y	Y	Y
i0_HQ_N_c137588/f13p13/1048	1048	N	N	N	Y	i0_HQ_C_c2268/f2p18/579	579	N	N	N	Y
i0_HQ_N_c137596/f5p26/869	869	N	N	Y	Y	i0_HQ_C_c22687/f2p5/618	618	N	N	N	Y
i0_HQ_N_c137598/f21p0/266	266	Y	Y	Y	Y	i0_HQ_C_c22689/f2p2/368	368	N	Y	Y	Y
i0_HQ_N_c137599/f2p1/372	372	Y	Y	Y	Y	i0_HQ_C_c22704/f2p3/656	656	N	N	N	Y
i0_HQ_N_c137601/f15p4/499	499	N	N	Y	Y	i0_HQ_C_c22707/f2p1/845	845	N	N	Y	Y
i0_HQ_N_c137607/f13p2/655	655	N	Y	N	Y	i0_HQ_C_c22721/f2p0/832	832	N	Y	Y	Y
i0_HQ_N_c137608/f17p3/704	704	N	Y	Y	Y	i0_HQ_C_c22723/f3p0/487	487	Y	Y	Y	Y
i0_HQ_N_c137616/f32p46/815	815	N	N	N	Y	i0_HQ_C_c22728/f2p1/425	425	Y	Y	Y	Y
i0_HQ_N_c137619/f21p76/428	428	N	N	Y	Y	i0_HQ_C_c2273/f5p0/430	430	Y	N	N	Y
i0_HQ_N_c137620/f10p24/388	388	Y	Y	Y	Y	i0_HQ_C_c22731/f2p0/603	603	N	N	Y	Y
i0_HQ_N_c137622/f18p6/595	595	N	N	Y	Y	i0_HQ_C_c22732/f3p1/354	354	Y	Y	Y	Y
i0_HQ_N_c137623/f16p2/286	286	Y	Y	Y	Y	i0_HQ_C_c22739/f2p0/236	236	Y	Y	Y	Y
i0_HQ_N_c137624/f19p13/420	420	Y	N	Y	Y	i0_HQ_C_c2275/f2p9/471	471	Y	N	Y	Y
i0_HQ_N_c137625/f5p0/291	291	Y	Y	Y	Y	i0_HQ_C_c2276/f2p10/370	370	Y	Y	Y	Y
i0_HQ_N_c137626/f6p2/312	312	Y	Y	Y	Y	i0_HQ_C_c22765/f2p0/910	910	N	N	N	Y
i0_HQ_N_c137628/f24p8/393	393	Y	Y	Y	Y	i0_HQ_C_c22770/f2p3/298	298	N	Y	Y	Y
i0_HQ_N_c137630/f13p0/453	453	Y	N	Y	Y	i0_HQ_C_c22773/f3p4/492	492	N	N	Y	Y
i0_HQ_N_c137633/f91p3/852	852	N	N	Y	N	i0_HQ_C_c22779/f3p1/916	916	N	N	N	Y
i0_HQ_N_c137634/f17p19/429	429	N	N	Y	Y	i0_HQ_C_c2278/f3p1/972	972	N	N	N	Y
i0_HQ_N_c137635/f25p0/216	216	Y	Y	Y	Y	i0_HQ_C_c22794/f2p2/640	640	N	Y	Y	Y
i0_HQ_N_c137636/f16p5/628	628	N	N	Y	Y	i0_HQ_C_c22810/f3p21/716	716	N	N	Y	Y
i0_HQ_N_c137637/f3p3/591	591	N	N	N	Y	i0_HQ_C_c22819/f2p0/273	273	Y	Y	Y	Y
i0_HQ_N_c137638/f18p3/860	860	N	N	Y	Y	i0_HQ_C_c2282/f5p1/849	849	N	N	N	Y
i0_HQ_N_c137639/f13p2/332	332	Y	Y	Y	Y	i0_HQ_C_c2283/f7p2/609	609	N	N	Y	Y
i0_HQ_N_c137640/f23p53/470	470	Y	N	Y	Y	i0_HQ_C_c22837/f3p2/591	591	N	N	Y	Y
i0_HQ_N_c137642/f23p9/408	408	N	N	Y	Y	i0_HQ_C_c2285/f5p4/998	998	N	N	N	Y
i0_HQ_N_c137643/f12p0/263	263	Y	Y	Y	Y	i0_HQ_C_c2286/f4p0/558	558	N	N	Y	Y
i0_HQ_N_c137644/f126p18/669	669	N	N	Y	Y	i0_HQ_C_c22869/f2p2/320	320	Y	Y	Y	Y
i0_HQ_N_c137645/f52p11/508	508	Y	N	Y	Y	i0_HQ_C_c2289/f8p2/395	395	N	N	Y	Y
i0_HQ_N_c137646/f3p3/393	393	Y	N	Y	Y	i0_HQ_C_c22905/f3p1/538	538	N	Y	Y	Y
i0_HQ_N_c137647/f20p29/935	935	N	N	Y	Y	i0_HQ_C_c2293/f2p0/293	293	Y	N	Y	Y
i0_HQ_N_c137665/f65p29/762	762	N	N	N	Y	i0_HQ_C_c22931/f2p12/644	644	N	N	N	Y
i0_HQ_N_c137667/f12p2/678	678	N	N	N	Y	i0_HQ_C_c22946/f3p1/316	316	Y	Y	Y	Y
i0_HQ_N_c137670/f27p3/852	852	N	N	N	Y	i0_HQ_C_c2295/f5p0/670	670	Y	Y	Y	Y
i0_HQ_N_c137675/f2p0/678	678	N	N	Y	Y	i0_HQ_C_c22952/f2p0/293	293	Y	Y	Y	Y
i0_HQ_N_c137676/f30p7/493	493	N	N	Y	Y	i0_HQ_C_c22955/f2p2/486	486	N	N	N	Y
i0_HQ_N_c137677/f27p3/680	680	N	N	Y	Y	i0_HQ_C_c2296/f6p2/478	478	Y	Y	Y	Y
i0_HQ_N_c137683/f57p24/594	594	N	N	Y	Y	i0_HQ_C_c22967/f2p0/877	877	N	N	Y	Y
i0_HQ_N_c137695/f10p0/261	261	Y	N	Y	Y	i0_HQ_C_c22968/f3p1/737	737	N	N	Y	N
i0_HQ_N_c137699/f13p1/655	655	N	N	N	Y	i0_HQ_C_c2298/f3p2/440	440	N	N	Y	Y
i0_HQ_N_c1377/f2p0/852	852	Y	Y	Y	N	i0_HQ_C_c22982/f2p3/932	932	N	N	N	Y
i0_HQ_N_c137703/f16p90/460	460	Y	N	N	Y	i0_HQ_C_c2300/f2p6/794	794	Y	N	N	N
i0_HQ_N_c137704/f3p7/564	564	N	N	N	Y	i0_HQ_C_c23018/f2p0/910	910	N	N	Y	N
i0_HQ_N_c137709/f2p4/306	306	N	Y	Y	Y	i0_HQ_C_c23031/f2p5/519	519	N	N	Y	Y
i0_HQ_N_c137714/f13p5/823	823	N	N	N	Y	i0_HQ_C_c2306/f2p1/306	306	N	Y	Y	Y
i0_HQ_N_c137718/f13p0/225	225	Y	Y	Y	Y	i0_HQ_C_c2307/f2p1/844	844	N	N	Y	Y
i0_HQ_N_c137719/f14p4/660	660	N	N	Y	Y	i0_HQ_C_c23072/f2p4/628	628	N	N	N	Y
i0_HQ_N_c137740/f10p4/416	416	Y	N	N	Y	i0_HQ_C_c23073/f2p0/740	740	N	N	N	Y
i0_HQ_N_c137742/f10p0/913	913	Y	N	Y	Y	i0_HQ_C_c23074/f2p0/595	595	N	N	Y	Y
i0_HQ_N_c13775/f3p4/637	637	Y	N	Y	Y	i0_HQ_C_c2308/f2p1/642	642	N	N	N	Y
i0_HQ_N_c137757/f10p0/365	365	Y	Y	Y	Y	i0_HQ_C_c23080/f2p1/537	537	N	N	N	Y
i0_HQ_N_c137760/f3p2/909	909	N	N	Y	N	i0_HQ_C_c2311/f2p0/978	978	N	N	Y	Y
i0_HQ_N_c13777/f7p4/537	537	N	N	Y	Y	i0_HQ_C_c23114/f2p10/415	415	N	N	Y	Y
i0_HQ_N_c1378/f5p5/611	611	N	N	N	Y	i0_HQ_C_c23117/f3p84/615	615	Y	N	Y	Y
i0_HQ_N_c13780/f7p1/569	569	N	N	N	Y	i0_HQ_C_c23122/f2p0/606	606	Y	Y	Y	Y
i0_HQ_N_c137800/f2p1/534	534	Y	N	Y	Y	i0_HQ_C_c23126/f2p1/420	420	N	N	Y	Y
i0_HQ_N_c137805/f2p3/785	785	N	N	N	Y	i0_HQ_C_c23129/f2p0/299	299	N	Y	Y	Y
i0_HQ_N_c13783/f2p0/432	432	Y	Y	Y	Y	i0_HQ_C_c23146/f2p7/680	680	N	N	N	Y
i0_HQ_N_c137833/f2p3/632	632	N	N	Y	Y	i0_HQ_C_c2315/f2p0/248	248	Y	Y	Y	Y
i0_HQ_N_c137835/f3p3/906	906	N	N	Y	Y	i0_HQ_C_c2316/f15p4/691	691	N	N	Y	Y
i0_HQ_N_c137837/f3p3/778	778	N	N	N	Y	i0_HQ_C_c2318/f2p0/265	265	Y	Y	Y	Y
i0_HQ_N_c137844/f2p2/630	630	N	N	N	Y	i0_HQ_C_c23186/f3p14/989	989	N	N	Y	N
i0_HQ_N_c137867/f4p5/410	410	Y	Y	Y	Y	i0_HQ_C_c2319/f5p0/514	514	N	Y	Y	Y
i0_HQ_N_c137877/f3p1/803	803	N	N	Y	Y	i0_HQ_C_c23195/f2p0/771	771	N	N	N	Y
i0_HQ_N_c137894/f2p3/512	512	Y	N	Y	Y	i0_HQ_C_c2320/f2p0/816	816	N	N	N	Y
i0_HQ_N_c1379/f5p0/988	988	N	N	Y	Y	i0_HQ_C_c23200/f2p0/889	889	N	N	Y	N
[truncated: 147,306 more rows]
